# Supplementary material for: Iron-catalyzed cascade cyclization of diaryldiyn-3-ones with P(O)H compounds: a rapid method for accessing 10-phosphorylated benzo[b]fluorenones
Source: Royal Society of Chemistry journal article supplement (doi:10.1039/d4qo00703d), 2024-01-01
Supplement: d4qo00703d1.pdf [file d4qo00703d1.pdf]

## Electronic Supplementary Information

for

### **Iron-catalyzed cascade cyclization of diaryldiyn-3-ones with P(O)H compounds: a rapid way for accessing 10-phosphorylated benzo[*b*]fluorenones**

Yinwei Cao, Yue Ying, Jieyi Wu, Fushan Chen,\* Guo Tang,\* and Yufen Zhao

Department of Chemistry, College of Chemistry and Chemical Engineering, and the Key Laboratory  
for Chemical Biology of Fujian Province, Xiamen University, Xiamen, Fujian 361005, China.

E-mail: [17706925334@163.com](mailto:17706925334@163.com); [t12g21@xmu.edu.cn](mailto:t12g21@xmu.edu.cn)

### Table of Contents

|          |                                                          |            |
|----------|----------------------------------------------------------|------------|
| <b>1</b> | <b>General information</b>                               | <b>S2</b>  |
| <b>2</b> | <b>General experimental procedures</b>                   | <b>S3</b>  |
| <b>3</b> | <b>Characterization for products</b>                     | <b>S6</b>  |
| <b>4</b> | <b>Photophysical properties of the selected products</b> | <b>S21</b> |
| <b>5</b> | <b>NMR spectrum of isolated products</b>                 | <b>S22</b> |
| <b>6</b> | <b>Crystallographic spectrum for 3a</b>                  | <b>S59</b> |

## 1. General information.

All reactions were carried out under dry Ar (unless otherwise noted). All glassware was oven-dried prior to use. The commercially available reagents were purchased from TCI, Energy Chemical and Bide Pharmatech Ltd and used without further purification. 1,6-diyne-3-one derivatives were prepared from literary. Toluene, *N,N*-dimethylformamide, dimethyl sulfoxide, tetrahydrofuran, acetonitrile and dichloroethane (exact dry, water < 50 ppm) were purchased from Sinopharm Chemical Reagent Co., Ltd and used as the solvent. petroleum ether and ethyl acetate are all AR grade were obtained commercially and used as eluent without further purification. <sup>1</sup>H, <sup>13</sup>C, <sup>31</sup>P, <sup>19</sup>F and spectra were measured on Bruker AV 500M spectrometers with CDCl<sub>3</sub> as solvent. Data were reported relative to solvent peaks CDCl<sub>3</sub> 7.26 ppm for <sup>1</sup>H NMR and CDCl<sub>3</sub> 77.26 ppm for <sup>13</sup>C NMR. 85% H<sub>3</sub>PO<sub>4</sub> as external standard for <sup>31</sup>P{<sup>1</sup>H} NMR spectra. Data are represented as follows: chemical shift, multiplicity (s = singlet, d = doublet, t = triplet, q = quartet, m = multiplet, dd = doublet of doublets, dt = doublet of triplets, br = broad), coupling constants in Hertz (Hz). The products were purified by column chromatography on silica gel 300-400 mesh. Isolated products were further characterized by HRMS (FT-ICR-MS) and an electrospray ionization source in positive-ion mode.

## 2 General experimental procedures

### Iron-catalyzed cascade cyclization of diaryldiyn-3-ones with P(O)H compounds

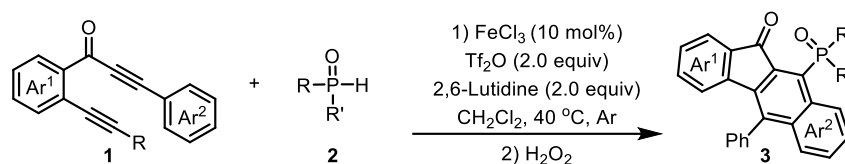

A schlenk tube containing diaryldiyn-3-ones (**1**, 0.30 mmol), P(O)H compounds (**2**, 0.60 mmol) and FeCl<sub>3</sub> (0.03 mmol) were evacuated and purged with argon three times. CH<sub>2</sub>Cl<sub>2</sub> (3.0 mL), 2,6-Lutidine (0.60 mmol) and Tf<sub>2</sub>O (0.60 mmol) were sequentially added to the system at room temperature. Then the system stirred at 40 °C for 4 h. Upon completion of reaction, saturated NaHCO<sub>3</sub> was added and the reaction was oxidized by H<sub>2</sub>O<sub>2</sub> (30% aq. 0.5 mL) for 30 min under air. The resulting mixture was quenched with saturated Na<sub>2</sub>S<sub>2</sub>O<sub>3</sub> and extracted with ethyl acetate (3 x 10.0 mL). The combined organic layer was removed in vacuum, dried over with MgSO<sub>4</sub>. The crude residues were purified by silica gel column chromatography using petroleum ether/ethyl acetate as the eluent (8:1–2:1) to afford the desired phosphorylation products as yellow solids.

### Preparation of Aryl-Fused 1,6-Diyn-3-ones

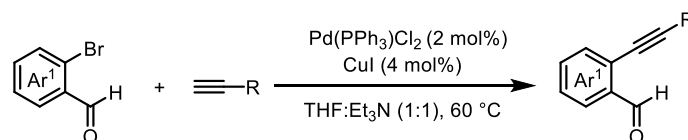

2'-Bromo-benzaldehyde derivatives (1.0 equiv), Pd(PPh<sub>3</sub>)<sub>2</sub>Cl<sub>2</sub> (2 mol%), and CuI (4 mol%) were dissolved in dry THF/Et<sub>3</sub>N (1:1) in a round-bottom flask under a nitrogen atmosphere at room temperature. After 5 min of stirring, the corresponding terminal alkyne (1.2 equiv) was added and the reaction mixture was refluxed at 60 °C using an oil bath. After the completion of the reaction as indicated by TLC, the reaction mixture was filtered through Celite and the solvents were evaporated under reduced pressure. Finally, the crude product was purified by column chromatography (silica gel, hexanes/EtOAc) to get pure 2-(arylethynyl)benzaldehyde derivatives.

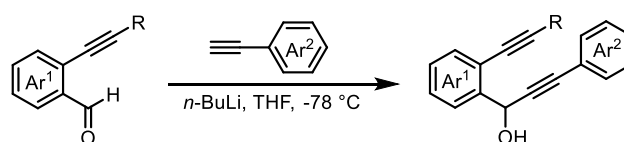

To a solution of alkyne (1.2 equiv) in dry THF at -78 °C, *n*-BuLi (2.5 M in hexanes, 1.2 equiv) was added slowly and stirred for 45 min at -78 °C and then a solution of 2-(arylethynyl)benzaldehyde derivatives (1.0 equiv) in THF was added slowly. The resulting mixture was allowed to stir for 2 h at room temperature. After completion of the reaction as mentioned by TLC, the reaction mixture was quenched by aqueous NH<sub>4</sub>Cl solution and the organic layer was

extracted with EtOAc and dried over anhydrous Na<sub>2</sub>SO<sub>4</sub>. The organic layer was concentrated under reduced pressure, and it was directly used for further reaction.

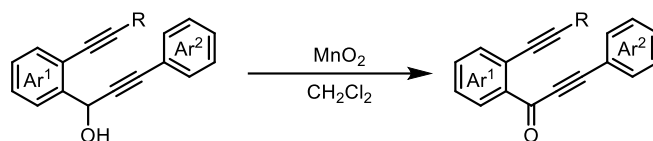

MnO<sub>2</sub> (15.0 equiv) was added in portions to a solution of the alcohol derivatives in CH<sub>2</sub>Cl<sub>2</sub> and stirred at room temperature. After completion of the reaction as indicated by TLC, the reaction mixture was filtered through Celite and concentrated under reduced pressure. The residue was purified by column chromatography to yield the corresponding 1,6-diyne-3-ones.

### Gram scale preparation of **3a**

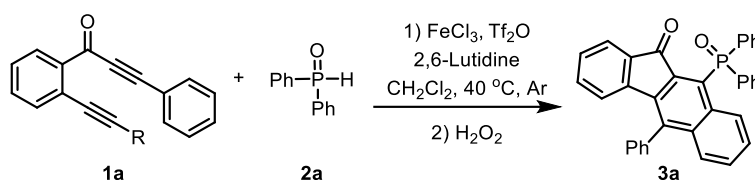

To a 50 mL Schlenk tube was added **1a** (1.55 g, 5.00 mmol), FeCl<sub>3</sub> (80.0 mg, 0.50 mmol), **2a** (2.02 g, 10.00 mmol) and 30 mL CH<sub>2</sub>Cl<sub>2</sub>. Then 2,6-lutidine (1.2 mL, 10.00 mmol) and Tf<sub>2</sub>O (1.5 mL, 10.00 mmol) was added. The mixture was stirred at 40°C oil bath for 12 h. Upon completion of reaction, saturated NaHCO<sub>3</sub> solution (10.0 mL) and 30% H<sub>2</sub>O<sub>2</sub> (10.0 mL) were added and stirred for 1 h. The mixture was quenched with Na<sub>2</sub>S<sub>2</sub>O<sub>3</sub> solution. Then mixture was extracted with EA (3 x 30.0 mL), The combined organic layers were dried over NaSO<sub>4</sub>, filtered, and concentrated in vacuo. The residue was separated by flash column chromatography to give **3a** as a yellow solid (1.34 g, 53% yield).

### Further transformation of products

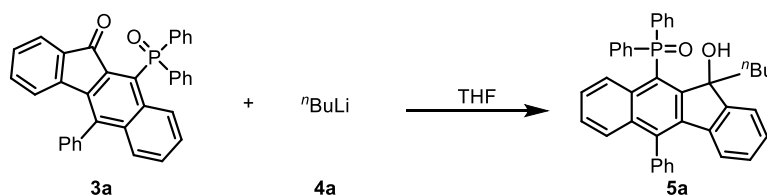

A stirred solution of compound **3a** (0.20 mmol) in anhydrous THF (2.0 mL) was added *n*-BuLi (100 μL, 2.5 M in hexane) at -40 °C. Then the mixture was stirred at room temperature overnight. TLC monitored the reaction to reach completion. The reaction was quenched by addition of saturated NH<sub>4</sub>Cl solution (3.0 mL). Extracted with EA (3 x 5.0 mL), the combined organic layers were washed with brine, dried over Na<sub>2</sub>SO<sub>4</sub>. The concentrated residue was purified by column chromatography to afford the desired product **5a** as a yellow solid (68.8 mg, 61% yield).

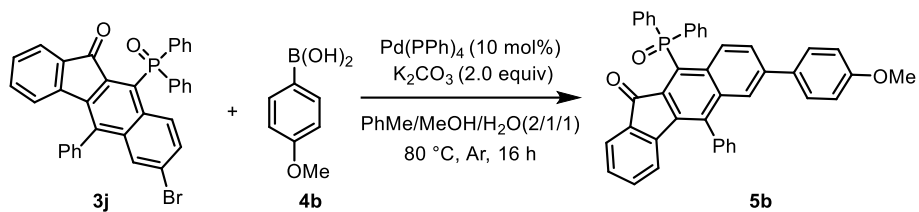

A mixture of **3j** (0.20 mmol, 1.0 equiv) and (4-methoxyphenyl)boronic acid (0.40 mmol, 2.0 equiv), Pd(PPh)<sub>4</sub> (0.02 mmol, 0.1 equiv), K<sub>2</sub>CO<sub>3</sub> (0.20 mmol, 2.0 equiv), and the solvent (PhMe/MeOH/H<sub>2</sub>O, 2.0 mL/1.0 mL/1.0 mL) added into a 10.0 mL Schlenk flask. The reaction was then carried out at 80 °C for 16 h under an argon atmosphere. After cooling, 3.0 mL H<sub>2</sub>O was added and the product was extracted with CH<sub>2</sub>Cl<sub>2</sub> (3 x 5.0 mL). The organic layer was dried with anhydrous sodium sulfate, the solvent was evaporated under a vacuum and crude product was purified by column chromatography to afford the desired product **5b** as a yellow solid (99.1 mg, 81% yield).

### 3. Characterization for products

#### 5-phenyl-11H-benzo[b]fluoren-11-one (3a', new compound)

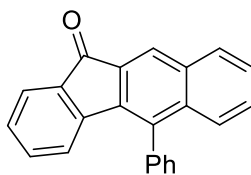

yellow solid; 18.4 mg, 20% yield; **m.p.**: 218-220 °C; **<sup>1</sup>H NMR (CDCl<sub>3</sub>, 500 MHz)**: δ 7.91 (s, 1H), 7.86 (d, *J* = 8.0 Hz, 1H), 7.75 (d, *J* = 7.7 Hz, 1H), 7.66-7.63 (m, 2H), 7.58-7.52 (m, 5H), 7.40-7.35 (m, 3H), 7.32 (t, *J* = 7.4 Hz, 1H); **<sup>13</sup>C{<sup>1</sup>H} NMR (CDCl<sub>3</sub>, 125 MHz)**: δ 192.4, 144.3, 141.4, 138.6, 136.9, 136.5, 135.7, 134.9, 134.0, 129.8, 129.4, 129.2, 129.0, 128.9, 128.3, 128.2, 127.0, 124.4, 120.9, 118.9; **FT-IR(film)**: 1705, 1277, 1181 cm<sup>-1</sup>; **HRMS**: [M+H]<sup>+</sup> *m/z* calcd for C<sub>23</sub>H<sub>15</sub>O<sup>+</sup> 307.1117, found 307.1115.

#### 10-(diphenylphosphanyl)-5-phenyl-11H-benzo[b]fluoren-11-one (new compound)

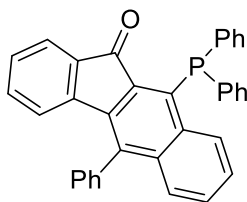

yellow gummy; 89.7 mg, 61% yield; **<sup>1</sup>H NMR (CDCl<sub>3</sub>, 500 MHz)**: δ 8.25 (d, *J* = 9.0 Hz, 1H), 7.66-7.62 (m, 4H), 7.55-7.52 (m, 4H), 7.50-7.44 (m, 4H), 7.34-7.29 (m, 6H), 7.21-7.11 (m, 3H), 6.24 (d, *J* = 7.4 Hz, 1H); **<sup>13</sup>C{<sup>1</sup>H} NMR (CDCl<sub>3</sub>, 125 MHz)**: δ 192.5 (d, *J* = 1.8 Hz), 143.9, 138.4 (d, *J* = 19.8 Hz), 137.7, 137.2 (d, *J* = 41.1 Hz), 137.1, 136.9, 136.8, 136.7, 136.3, 135.9 (d, *J* = 7.8 Hz), 135.5, 134.4, 132.3 (d, *J* = 19.5 Hz), 130.8 (d, *J* = 10.3 Hz), 129.5 (d, *J* = 21.6 Hz), 128.7, 128.49 (d, *J* = 5.8 Hz), 128.46, 128.3, 128.0, 127.7, 126.1, 124.2, 123.7; **<sup>31</sup>P NMR (CDCl<sub>3</sub>, 202 MHz)**: δ -16.1; **FT-IR(film)**: 1708, 1195, 957, 908 cm<sup>-1</sup>; **HRMS**: [M+H]<sup>+</sup> *m/z* calcd for C<sub>35</sub>H<sub>24</sub>OP<sup>+</sup> 491.1559, found 491.1551.

#### 10-(diphenylphosphoryl)-5-phenyl-11H-benzo[b]fluoren-11-one (3a, new compound)

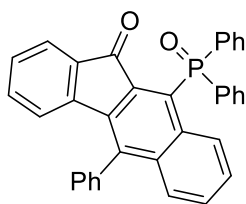

yellow solid; 107.8 mg, 71% yield; **m.p.**: 260-263 °C; **<sup>1</sup>H NMR (CDCl<sub>3</sub>, 500 MHz)**: δ 9.66 (d, *J* = 9.0 Hz, 1H), 7.91-7.87 (m, 4H), 7.65-7.60 (m, 3H), 7.51-7.47 (m, 4H), 7.46-7.40 (m, 7H), 7.32 (d, *J* = 6.7 Hz, 1H), 7.13-7.08 (m, 2H), 6.16 (d, *J* = 7.2 Hz, 1H); **<sup>13</sup>C{<sup>1</sup>H} NMR (CDCl<sub>3</sub>, 125 MHz)**: δ 191.3 (d, *J* = 3.5 Hz), 144.2, 139.0 (d, *J* = 2.2 Hz), 137.8 (d, *J* = 7.7 Hz), 137.4, 137.0 (d, *J* = 7.9 Hz), 136.5 (d, *J* = 6.9 Hz), 135.4, 135.1, 135.0 (d, *J* = 10.3 Hz), 134.2 (d, *J* = 110.3 Hz), 131.7 (d, *J* = 2.2 Hz), 131.6 (d, *J* = 11.1 Hz), 131.3 (d, *J* = 3.4 Hz), 130.7 (d, *J* = 89.1 Hz), 129.7, 129.5, 129.2, 129.0, 128.9, 128.4 (d, *J* = 13.0 Hz), 127.7, 127.6, 124.3, 124.0; **<sup>31</sup>P NMR (CDCl<sub>3</sub>, 202 MHz)**: δ 33.6; **FT-IR(film)**: 1710, 1437, 1174, 1119 cm<sup>-1</sup>; **HRMS**: [M+H]<sup>+</sup> *m/z* calcd for C<sub>35</sub>H<sub>24</sub>O<sub>2</sub>P<sup>+</sup> 507.1508, found 507.1512.

**10-(diphenylphosphoryl)-3-methyl-5-phenyl-11H-benzo[b]fluoren-11-one (3b, new compound)**

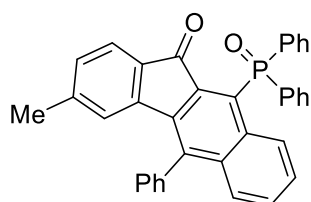

yellow solid; 120.1 mg, 77% yield; **m.p.**: 258-259 °C; **<sup>1</sup>H NMR (CDCl<sub>3</sub>, 500 MHz)**: δ 9.69 (d, *J* = 8.6 Hz, 1H), 7.93 (d, *J* = 7.3 Hz, 2H), 7.91 (d, *J* = 7.3 Hz, 2H), 7.66-7.63 (m, 4H), 7.54-7.48 (m, 4H), 7.46-7.42 (m, 7H), 7.24 (d, *J* = 7.8 Hz, 1H), 6.91 (d, *J* = 7.6 Hz, 1H), 5.92 (s, 1H), 2.07 (s, 3H); **<sup>13</sup>C{<sup>1</sup>H} NMR (CDCl<sub>3</sub>, 125 MHz)**: δ 190.8 (d, *J* = 3.2 Hz), 146.1, 144.4, 138.7 (d, *J* = 2.5 Hz), 138.4 (d, *J* = 7.2 Hz), 137.4, 136.8 (d, *J* = 8.6 Hz), 136.4 (d, *J* = 6.6 Hz), 135.0 (d, *J* = 11.1 Hz), 134.3 (d, *J* = 109.6 Hz), 133.1, 131.52 (d, *J* = 2.2 Hz), 131.51 (d, *J* = 11.1 Hz), 131.2 (d, *J* = 4.3 Hz), 130.3 (d, *J* = 89.2 Hz), 129.65, 129.56, 129.4, 129.0, 128.7, 128.3 (d, *J* = 13.0 Hz), 127.51, 127.49, 124.8, 124.2, 22.4; **<sup>31</sup>P NMR (CDCl<sub>3</sub>, 202 MHz)**: δ 33.6; **FT-IR(film)**: 1707, 1437, 1173, 1119 cm<sup>-1</sup>; **HRMS**: [M+H]<sup>+</sup> *m/z* calcd for C<sub>36</sub>H<sub>26</sub>O<sub>2</sub>P<sup>+</sup> 521.1665, found 521.1668.

**10-(diphenylphosphoryl)-3-fluoro-5-phenyl-11H-benzo[b]fluoren-11-one (3c, new compound)**

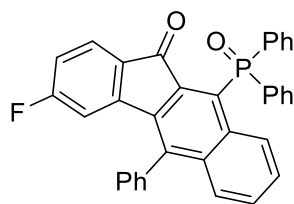

yellow solid; 107.0 mg, 68% yield; **m.p.**: 245-247 °C; **<sup>1</sup>H NMR (CDCl<sub>3</sub>, 500 MHz)**: δ 9.67 (d, *J* = 9.2 Hz, 1H), 7.90-7.87 (m, 4H), 7.68-7.64 (m, 3H), 7.54-7.44 (m, 9H), 7.41-7.40 (m, 2H), 7.35-7.33 (m, 1H), 7.77 (dt, *J*<sub>1</sub> = 8.5 Hz, *J*<sub>2</sub> = 2.1 Hz, 1H), 5.78 (dd, *J*<sub>1</sub> = 9.6 Hz, *J*<sub>2</sub> = 2.2 Hz, 1H); **<sup>13</sup>C{<sup>1</sup>H} NMR (CDCl<sub>3</sub>, 125 MHz)**: δ 189.4 (d, *J* = 3.2 Hz), 166.8 (d, *J* = 255.1 Hz), 146.7 (d, *J* = 10.9 Hz), 139.4 (d, *J* = 2.0 Hz), 137.6 (d, *J* = 6.6 Hz), 136.60 (d, *J* = 7.6 Hz), 136.56, 136.5 (d, *J* = 6.5 Hz), 134.0 (d, *J* = 109.6 Hz), 133.5 (d, *J* = 10.1 Hz), 131.6 (d, *J* = 2.0 Hz), 131.4 (d, *J* = 10.0 Hz), 131.2 (d, *J* = 3.6 Hz), 130.7 (d, *J* = 88.5 Hz), 129.7, 129.2, 129.1, 129.0, 128.3 (d, *J* = 12.8 Hz), 127.8, 127.6, 126.3, 126.2, 115.8 (d, *J* = 23.7 Hz), 111.4 (d, *J* = 25.8 Hz); **<sup>31</sup>P NMR (CDCl<sub>3</sub>, 202 MHz)**: δ 33.3; **<sup>19</sup>F NMR (CDCl<sub>3</sub>, 471 MHz)**: δ -103.01; **FT-IR(film)**: 1713, 1611, 1436, 1176, 1119 cm<sup>-1</sup>; **HRMS**: [M+Na]<sup>+</sup> *m/z* calcd for C<sub>35</sub>H<sub>22</sub>FN<sub>2</sub>O<sub>2</sub>P<sup>+</sup> 547.1234, found 547.1238.

### 3-chloro-10-(diphenylphosphoryl)-5-phenyl-11H-benzo[b]fluoren-11-one (3d, new compound)

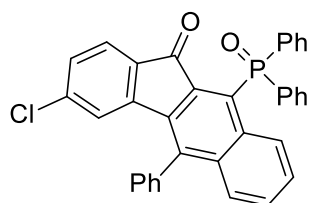

yellow solid; 115.0 mg, 71% yield; **m.p.**: 261-263 °C; **<sup>1</sup>H NMR (CDCl<sub>3</sub>, 500 MHz)**: δ 9.65 (d, *J* = 8.5 Hz, 1H), 7.90-7.88 (m, 4H), 7.69-7.64 (m, 3H), 7.55-7.48 (m, 5H), 7.47-7.44 (m, 4H), 7.42-7.40 (m, 2H), 7.26 (d, *J* = 7.9 Hz, 1H), 7.08 (dd, *J*<sub>1</sub> = 8.2 Hz, *J*<sub>2</sub> = 1.0 Hz, 1H), 6.05 (d, *J* = 1.6 Hz, 1H); **<sup>13</sup>C{<sup>1</sup>H} NMR (CDCl<sub>3</sub>, 125 MHz)**: δ 190.0 (d, *J* = 3.4 Hz), 145.7, 141.3, 139.7 (d, *J* = 2.1 Hz), 137.6 (d, *J* = 6.8 Hz), 136.81, 136.78 (d, *J* = 5.5 Hz), 136.7 (d, *J* = 6.6 Hz), 134.1 (d, *J* = 109.6 Hz), 133.9 (d, *J* = 10.5 Hz), 133.6, 131.8 (d, *J* = 3.0 Hz), 131.6 (d, *J* = 11.0 Hz), 131.4 (d, *J* = 4.4 Hz), 131.3 (d, *J* = 84.2 Hz), 129.9, 129.4, 129.3, 129.2, 129.1, 128.5 (d, *J* = 13.3 Hz), 128.1, 127.8, 125.3, 124.4; **<sup>31</sup>P NMR (CDCl<sub>3</sub>, 202 MHz)**: δ 33.2; **FT-IR(film)**: 1710, 1436, 1180, 1119 cm<sup>-1</sup>; **HRMS**: [M+H]<sup>+</sup> *m/z* calcd for C<sub>35</sub>H<sub>23</sub>ClO<sub>2</sub>P<sup>+</sup> 541.1119, found 541.1126.



**10-(diphenylphosphoryl)-5-phenyl-3-(trifluoromethyl)-11H-benzo[b]fluoren-11-one (3e, new compound)**

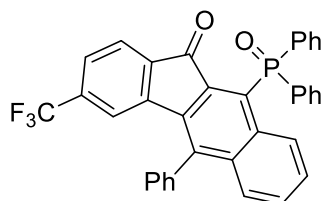

yellow solid; 115.4 mg, 67% yield; **m.p.**: 255-257 °C; **<sup>1</sup>H NMR (CDCl<sub>3</sub>, 500 MHz)**: δ 9.69 (d, *J* = 8.5 Hz, 1H), 7.92-7.88 (m, 4H), 7.69-7.64 (m, 3H), 7.61 (d, *J* = 8.2 Hz, 1H), 7.56-7.50 (m, 4H), 7.47-7.43 (m, 7H), 7.36 (d, *J* = 7.7 Hz, 1H), 6.33 (s, 1H); **<sup>13</sup>C{<sup>1</sup>H} NMR (CDCl<sub>3</sub>, 125 MHz)**: δ 190.0 (d, *J* = 3.1 Hz), 144.5, 140.0 (d, *J* = 2.0 Hz), 137.6, 137.0 (d, *J* = 7.4 Hz), 136.8 (d, *J* = 7.8 Hz), 136.7 (d, *J* = 6.4 Hz), 136.6, 136.1 (q, *J* = 32.2 Hz), 133.96 (d, *J* = 109.6 Hz), 133.95 (d, *J* = 12.1 Hz), 131.9 (d, *J* = 88.0 Hz), 131.8 (d, *J* = 3.3 Hz), 131.6 (d, *J* = 10.7 Hz), 131.5 (d, *J* = 3.9 Hz), 129.9, 129.6, 129.23, 129.21, 128.5 (d, *J* = 12.7 Hz), 128.2, 127.9, 125.9 (q, *J* = 3.3 Hz), 124.4, 123.3 (q, *J* = 274.5 Hz), 120.9 (q, *J* = 4.4 Hz); **<sup>31</sup>P NMR (CDCl<sub>3</sub>, 202 MHz)**: δ 32.9; **<sup>19</sup>F NMR (CDCl<sub>3</sub>, 471 MHz)**: δ -64.05; **FT-IR(film)**: 1716, 1437, 1318, 1171, 1121 cm<sup>-1</sup>; **HRMS: [M+H]<sup>+</sup> m/z calcd for C<sub>36</sub>H<sub>23</sub>F<sub>3</sub>O<sub>2</sub>P<sup>+</sup> 575.1382, found 575.1390.**

**10-(diphenylphosphoryl)-7-methyl-5-phenyl-11H-benzo[b]fluoren-11-one (3f, new compound)**

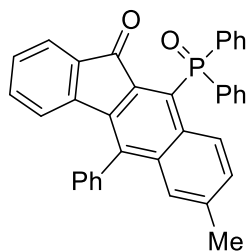

yellow solid; 113.9 mg, 73% yield; **m.p.**: 252-255 °C; **<sup>1</sup>H NMR (CDCl<sub>3</sub>, 500 MHz)**: δ 9.64 (d, *J* = 8.8 Hz, 1H), 7.93-7.89 (m, 4H), 7.66-7.61 (m, 3H), 7.50-7.48 (m, 2H), 7.46-7.41 (m, 6H), 7.36-7.32 (m, 2H), 7.28 (s, 1H), 7.11-7.06 (m, 2H), 6.13 (dd, *J*<sub>1</sub> = 7.3 Hz, *J*<sub>2</sub> = 1.6 Hz, 1H), 2.36 (s, 3H); **<sup>13</sup>C{<sup>1</sup>H} NMR (CDCl<sub>3</sub>, 125 MHz)**: δ 191.2(d, *J* = 3.3 Hz), 144.1, 139.6, 138.4 (d, *J* = 2.1 Hz), 137.5, 137.2 (d, *J* = 8.0 Hz), 136.7 (d, *J* = 7.0 Hz), 135.4, 135.2 (d, *J* = 10.9 Hz), 134.9, 134.7 (d, *J* = 6.1 Hz), 134.3 (d, *J* = 110.1 Hz), 131.53 (d, *J* = 2.0 Hz), 131.49 (d, *J* = 8.9 Hz), 131.0 (d, *J* = 3.5 Hz), 130.4 (d, *J* = 89.0 Hz), 129.7, 129.6, 129.4, 128.8, 128.7, 128.3 (d, *J* = 13.5 Hz), 126.8, 124.1,

123.8, 22.0;  $^{31}\text{P}$  NMR ( $\text{CDCl}_3$ , 202 MHz):  $\delta$  33.7; FT-IR(film): 1709, 1437, 1174, 1120  $\text{cm}^{-1}$ ;  
HRMS:  $[\text{M}+\text{H}]^+$   $m/z$  calcd for  $\text{C}_{36}\text{H}_{26}\text{O}_2\text{P}^+$  521.1665, found 521.1668.

**7-(tert-butyl)-10-(diphenylphosphoryl)-5-phenyl-11H-benzo[b]fluoren-11-one (3g, new compound)**

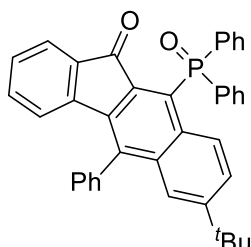

yellow solid; 138.3 mg, 82% yield; **m.p.**: 272-275  $^\circ\text{C}$ ;  $^1\text{H}$  NMR ( $\text{CDCl}_3$ , 500 MHz):  $\delta$  9.60 (d,  $J = 9.2$  Hz, 1H), 7.92-7.88 (m, 4H), 7.66-7.59 (m, 4H), 7.51-7.48 (m, 2H), 7.46-7.41 (m, 7H), 7.33-7.32 (m, 1H), 7.13-7.08 (m, 2H), 6.18 (dd,  $J_1 = 7.0$  Hz,  $J_2 = 1.7$  Hz, 1H), 1.23 (s, 9H);  $^{13}\text{C}\{^1\text{H}\}$  NMR ( $\text{CDCl}_3$ , 125 MHz):  $\delta$  191.4 (d,  $J = 3.3$  Hz), 152.2, 144.3, 139.1 (d,  $J = 3.3$  Hz), 137.6, 137.2 (d,  $J = 7.7$  Hz), 137.0 (d,  $J = 6.6$  Hz), 135.5, 135.1 (d,  $J = 11.0$  Hz), 134.9, 134.7 (d,  $J = 6.6$  Hz), 134.2 (d,  $J = 109.55$  Hz), 131.644 (d,  $J = 2.2$  Hz), 131.636 (d,  $J = 11.1$  Hz), 130.8 (d,  $J = 3.3$  Hz), 130.5 (d,  $J = 89.6$  Hz), 129.6, 129.5, 128.82, 128.80, 128.4 (d,  $J = 12.2$  Hz), 126.5, 124.2, 123.9, 123.0, 35.2, 30.9;  $^{31}\text{P}$  NMR ( $\text{CDCl}_3$ , 202 MHz):  $\delta$  33.5; FT-IR(film): 1710, 1610, 1436, 1174, 1118  $\text{cm}^{-1}$ ; HRMS:  $[\text{M}+\text{Na}]^+$   $m/z$  calcd for  $\text{C}_{39}\text{H}_{31}\text{NaO}_2\text{P}^+$  585.1954, found 585.1954.

**10-(diphenylphosphoryl)-7-fluoro-5-phenyl-11H-benzo[b]fluoren-11-one (3h, new compound)**

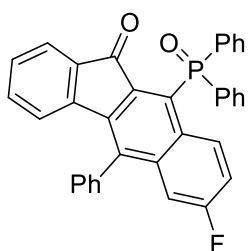

yellow solid; 125.8 mg, 74% yield; **m.p.**: 244-246  $^\circ\text{C}$ ;  $^1\text{H}$  NMR ( $\text{CDCl}_3$ , 500 MHz):  $\delta$  9.85 (dd,  $J_1 = 9.6$  Hz,  $J_2 = 5.9$  Hz, 1H), 7.88 (dd,  $J_1 = 12.8$  Hz,  $J_2 = 7.5$  Hz, 4H), 7.67-7.64 (m, 3H), 7.53-7.50 (m, 2H), 7.47-7.44 (m, 4H), 7.41-7.40 (m, 2H), 7.35-7.34 (m, 1H), 7.28-7.25 (m, 1H), 7.15-7.10 (m, 3H), 6.19-6.18 (m, 1H);  $^{13}\text{C}\{^1\text{H}\}$  NMR ( $\text{CDCl}_3$ , 125 MHz):  $\delta$  191.0 (d,  $J = 3.3$  Hz), 162.7 (d,  $J =$

252.1 Hz), 143.9, 139.4 (dd,  $J_1 = 8.2$  Hz,  $J_2 = 8.0$  Hz), 138.2 (dd,  $J_1 = 5.5$  Hz,  $J_2 = 2.5$  Hz), 137.0 (dd,  $J_1 = 6.6$  Hz,  $J_2 = 2.5$  Hz), 136.9, 136.2 (d,  $J = 11.1$  Hz), 135.5, 135.1, 134.3 (dd,  $J_1 = 8.8$  Hz,  $J_2 = 3.2$  Hz), 134.0 (d,  $J = 109.5$  Hz), 133.5 (d,  $J = 6.6$  Hz), 131.8 (d,  $J = 3.3$  Hz), 131.6 (d,  $J = 10.0$  Hz), 130.8 (d,  $J = 89.6$  Hz), 130.0, 129.4, 129.3, 129.2, 128.5 (d,  $J = 13.3$  Hz), 124.4, 124.1, 117.4 (d,  $J = 25.4$  Hz), 111.6 (d,  $J = 23.2$  Hz);  $^{31}\text{P}$  NMR ( $\text{CDCl}_3$ , 202 MHz):  $\delta$  33.7;  $^{19}\text{F}\{^1\text{H}\}$  NMR (471 MHz,  $\text{CDCl}_3$ ):  $\delta$  -101.05; FT-IR(film): 1712, 1611 1437, 1329, 1177 $\text{cm}^{-1}$ ; HRMS:  $[\text{M}+\text{Na}]^+$  m/z calcd for  $\text{C}_{35}\text{H}_{22}\text{FNaO}_2\text{P}^+$  547.1234, found 547.1232.

**7-chloro-10-(diphenylphosphoryl)-5-phenyl-11H-benzo[b]fluoren-11-one (3i, new compound)**

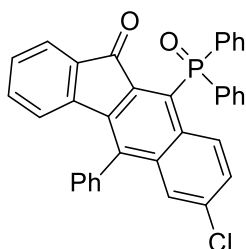

yellow solid; 124.8 mg, 77% yield; m.p: 268-269 °C;  $^1\text{H}$  NMR ( $\text{CDCl}_3$ , 500 MHz):  $\delta$  9.76 (d,  $J = 8.8$  Hz, 1H), 7.90-7.87 (m, 4H), 7.68-7.63 (m, 3H), 7.53-7.50 (m, 2H), 7.47-7.44 (m, 6H), 7.42-7.40 (m, 2H), 7.35-7.34 (m, 1H), 7.15-7.11 (m, 2H), 6.16-6.15 (m, 1H);  $^{13}\text{C}\{^1\text{H}\}$  NMR ( $\text{CDCl}_3$ , 125 MHz):  $\delta$  190.9 (d,  $J = 3.3$  Hz), 143.8, 138.2 (d,  $J = 8.8$  Hz), 138.0 (d,  $J = 2.2$  Hz), 137.7 (d,  $J = 7.7$  Hz), 136.6, 136.2 (d,  $J = 11.1$  Hz), 135.9, 135.4, 135.2, 134.8 (d,  $J = 6.6$  Hz), 133.9 (d,  $J = 109.5$  Hz), 132.9 (d,  $J = 3.3$  Hz), 131.8 (d,  $J = 3.3$  Hz), 131.6 (d,  $J = 10.0$  Hz), 130.7 (d,  $J = 87.3$  Hz), 129.9, 129.4, 129.3, 129.2, 128.5 (d,  $J = 12.2$  Hz), 128.3, 126.4, 124.4, 124.1;  $^{31}\text{P}$  NMR ( $\text{CDCl}_3$ , 202 MHz):  $\delta$  33.9; FT-IR(film): 1713, 1596, 1489, 1437, 1172 $\text{cm}^{-1}$ ; HRMS:  $[\text{M}+\text{H}]^+$  m/z calcd for  $\text{C}_{35}\text{H}_{23}\text{ClO}_2\text{P}^+$  541.1119, found 541.1119.

**7-bromo-10-(diphenylphosphoryl)-5-phenyl-11H-benzo[b]fluoren-11-one (3j, new compound)**

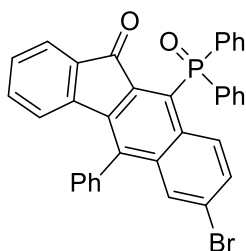

yellow solid; 110.4 mg, 63% yield; **m.p.**: 254-257 °C; **<sup>1</sup>H NMR (CDCl<sub>3</sub>, 500 MHz)**: δ 9.69 (d, *J* = 9.2 Hz, 1H), 7.90-7.87 (m, 4H), 7.67-7.64 (m, 4H), 7.60-7.58 (m, 1H), 7.52-7.50 (m, 2H), 7.47-7.40 (m, 6H), 7.35-7.34 (m, 1H), 7.15-7.10 (m, 2H), 6.15 (d, *J* = 7.0 Hz, 1H); **<sup>13</sup>C{<sup>1</sup>H} NMR (CDCl<sub>3</sub>, 125 MHz)**: δ 190.9 (d, *J* = 2.9 Hz), 143.7, 138.4 (d, *J* = 7.8 Hz), 137.9 (d, *J* = 1.7 Hz), 137.7 (d, *J* = 6.7 Hz), 136.5, 136.2 (d, *J* = 12.2 Hz), 135.3, 135.2, 135.0 (d, *J* = 6.5 Hz), 133.9 (d, *J* = 110.2 Hz), 132.8 (d, *J* = 3.0 Hz), 131.8 (d, *J* = 2.3 Hz), 131.5 (d, *J* = 10.4 Hz), 130.9, 130.8 (d, *J* = 88.0 Hz), 129.9, 129.6, 129.4, 129.3, 129.2, 128.4 (d, *J* = 13.0 Hz), 124.6, 124.3, 124.1; **<sup>31</sup>P NMR (CDCl<sub>3</sub>, 202 MHz)**: δ 33.8; **FT-IR(film)**: 1711, 1587, 1477, 1430, 1189cm<sup>-1</sup>; **HRMS**: [M+Na]<sup>+</sup> *m/z* calcd for C<sub>35</sub>H<sub>22</sub>BrNaO<sub>2</sub>P<sup>+</sup> 607.0433, found 607.0429.

**10-(diphenylphosphoryl)-5-phenyl-7-(trifluoromethyl)-11H-benzo[b]fluoren-11-one (3k, new compound)**

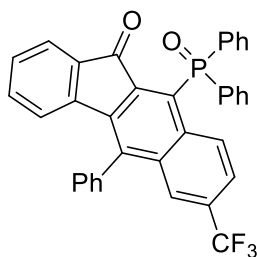

yellow solid; 79.2 mg, 46% yield; **m.p.**: 262-264 °C; **<sup>1</sup>H NMR (CDCl<sub>3</sub>, 500 MHz)**: δ 9.86 (d, *J* = 9.1 Hz, 1H), 7.91-7.86 (m, 4H), 7.78 (s, 1H), 7.69-7.66 (m, 4H), 7.55-7.51 (m, 2H), 7.49-7.41 (m, 6H), 7.39-7.35 (m, 1H), 7.19-7.13 (m, 2H), 6.20-6.18 (m, 1H); **<sup>13</sup>C{<sup>1</sup>H} NMR (CDCl<sub>3</sub>, 125 MHz)**: δ 190.8 (d, *J* = 3.1 Hz), 143.6, 139.3, 139.2 (d, *J* = 8.9 Hz), 137.8 (d, *J* = 7.3 Hz), 136.3 (d, *J* = 7.9 Hz), 136.09 (d, *J* = 9.8 Hz), 136.08, 135.2, 135.1, 135.6 (d, *J* = 109.7 Hz), 132.2 (d, *J* = 3.4 Hz), 131.7 (d, *J* = 2.2 Hz), 131.4 (d, *J* = 10.9 Hz), 130.7 (d, *J* = 88.3 Hz), 130.3 (q, *J* = 32.8 Hz), 129.8, 129.3, 129.24, 129.19, 128.3 (d, *J* = 13.2 Hz), 124.39 (q, *J* = 4.6 Hz), 124.36, 124.1, 123.8 (q, *J* = 272.4 Hz), 123.0 (q, *J* = 2.8 Hz); **<sup>31</sup>P NMR (CDCl<sub>3</sub>, 202 MHz)**: δ 33.5; **<sup>19</sup>F{<sup>1</sup>H} NMR (471 MHz, CDCl<sub>3</sub>)**: δ -63.30; **FT-IR(film)**: 1711, 1592, 1498, 1437, 1177cm<sup>-1</sup>; **HRMS**: [M+H]<sup>+</sup> *m/z* calcd for C<sub>36</sub>H<sub>23</sub>F<sub>3</sub>O<sub>2</sub>P<sup>+</sup> 575.1328, found 575.1326.

**10-(diphenylphosphoryl)-11-oxo-5-phenyl-11H-benzo[b]fluorene-7-carbonitrile (3l, new compound)**

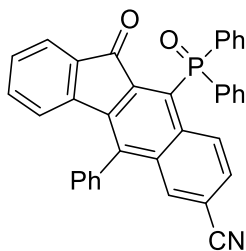

yellow solid; 84.6 mg, 53% yield; **m.p.**: 241-243 °C; **<sup>1</sup>H NMR (CDCl<sub>3</sub>, 500 MHz)**: δ 9.85 (d, *J* = 8.9 Hz, 1H), 7.89-7.85 (m, 5H), 7.70-7.68 (m, 3H), 9.64 (d, *J* = 8.9 Hz, 1H), 7.55-7.52 (m, 2H), 7.48-7.46 (m, 4H), 7.40-7.36 (m, 3H), 7.19-7.15 (m, 2H), 7.21 (dd, *J*<sub>1</sub> = 6.4 Hz, *J*<sub>2</sub> = 1.8 Hz, 1H); **<sup>13</sup>C{<sup>1</sup>H} NMR (CDCl<sub>3</sub>, 125 MHz)**: δ 190.6 (d, *J* = 2.2 Hz), 143.3, 140.0 (d, *J* = 6.6 Hz), 138.7, 138.0 (d, *J* = 6.6 Hz), 136.4 (d, *J* = 9.9 Hz), 136.3 (d, *J* = 7.7 Hz), 135.6, 135.4, 135.0, 133.3 (d, *J* = 11.6 Hz), 132.7, 132.3 (d, *J* = 3.3 Hz), 131.9, 131.4 (d, *J* = 11.0 Hz), 130.7 (d, *J* = 87.4 Hz), 130.0, 129.6, 129.5, 129.1, 128.4 (d, *J* = 13.3 Hz), 127.8, 124.5, 124.2, 118.6, 112.3; **<sup>31</sup>P NMR (CDCl<sub>3</sub>, 202 MHz)**: δ 33.7; **FT-IR(film)**: 2229, 1716, 1469, 1437, 1170, 1119 cm<sup>-1</sup>; **HRMS**: [M+Na]<sup>+</sup> *m/z* calcd for C<sub>36</sub>H<sub>22</sub>NNaO<sub>2</sub>P<sup>+</sup> 554.1280, found 554.1267.

**13-(diphenylphosphoryl)-7-phenyl-12H-indeno[1,2-b]phenanthren-12-one (3n, new compound)**

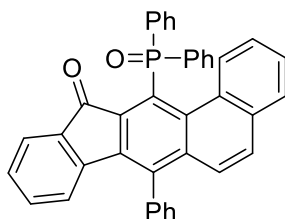

yellow solid; 111.8 mg, 67% yield; **m.p.**: 217-220 °C; **<sup>1</sup>H NMR (CDCl<sub>3</sub>, 500 MHz)**: δ 9.71 (d, *J* = 8.6 Hz, 1H), 8.14 (d, *J* = 8.2 Hz, 1H), 8.05 (d, *J* = 8.0 Hz, 1H), 7.96-7.91 (m, 6H), 7.67-7.61 (m, 2H), 7.54-7.41 (m, 11H), 7.35 (d, *J* = 8.0 Hz, 1H), 7.07 (t, *J* = 7.3 Hz, 1H), 7.01 (t, *J* = 7.6 Hz, 1H), 6.18 (d, *J* = 7.8 Hz, 1H); **<sup>13</sup>C{<sup>1</sup>H} NMR (CDCl<sub>3</sub>, 125 MHz)**: δ 191.3 (d, *J* = 3.1 Hz), 144.1, 138.8 (d, *J* = 2.1 Hz), 137.8 (d, *J* = 6.8 Hz), 137.1 (d, *J* = 7.8 Hz), 136.5 (d, *J* = 6.6 Hz), 135.4, 135.2 (d, *J* = 8.8 Hz), 135.1, 134.7, 134.3 (d, *J* = 110.0 Hz), 134.1 (d, *J* = 109.6 Hz), 133.8, 133.3, 131.7 (d, *J* = 3.3 Hz), 131.7 (d, *J* = 3.3 Hz), 131.6 (d, *J* = 10.2 Hz), 131.5 (d, *J* = 11.1 Hz), 131.3 (d, *J* = 4.4 Hz), 130.8 (d, *J* = 88.9 Hz), 129.6, 129.2, 129.0, 128.7, 128.45 (d, *J* = 2.8 Hz), 128.44, 128.4 (d, *J* = 3.4 Hz), 128.3, 127.7, 127.3, 127.1, 124.3, 124.0; **<sup>31</sup>P NMR (CDCl<sub>3</sub>, 202 MHz)**: δ 33.6; **FT-**

**IR(film):** 1711, 1436, 1175, 1118  $\text{cm}^{-1}$ ; **HRMS:**  $[\text{M}+\text{H}]^+$   $m/z$  calcd for  $\text{C}_{39}\text{H}_{26}\text{O}_2\text{P}^+$  557.1665, found 557.1665.

**10-(diphenylphosphoryl)-5-(4-methoxyphenyl)-11H-benzo[b]fluoren-11-one (3o, new compound)**

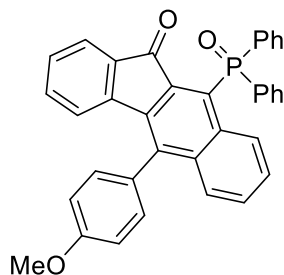

yellow solid; 90.0 mg, 56% yield; **m.p:** 263-264 °C;  **$^1\text{H}$  NMR ( $\text{CDCl}_3$ , 500 MHz):**  $\delta$  9.63 (d,  $J$  = 8.2 Hz, 1H), 7.91-7.86 (m, 4H), 7.56-7.42 (m, 9H), 7.35-7.30 (m, 3H), 7.18-7.08 (m, 4H) 6.31 (d,  $J$  = 7.6 Hz, 1H), 3.97 (s, 3H);  **$^{13}\text{C}\{^1\text{H}\}$  NMR ( $\text{CDCl}_3$ , 125 MHz):**  $\delta$  191.4 (d,  $J$  = 3.1 Hz), 160.1, 144.4, 139.0 (d,  $J$  = 2.4 Hz), 137.9 (d,  $J$  = 6.9 Hz), 137.5 (d,  $J$  = 7.8 Hz), 136.5 (d,  $J$  = 6.4 Hz), 135.7 (d,  $J$  = 10.4 Hz), 135.41, 135.37, 135.1, 134.3 (d,  $J$  = 109.7 Hz), 133.7, 131.7, 131.3 (d,  $J$  = 3.5 Hz), 131.1 (d,  $J$  = 84.3 Hz), 130.7, 129.3, 129.1, 128.9, 128.4 (d,  $J$  = 12.9 Hz), 127.6, 124.3, 124.1, 115.1, 55.7;  **$^{31}\text{P}$  NMR ( $\text{CDCl}_3$ , 202 MHz):**  $\delta$  33.8; **FT-IR(film):** 1712, 1611, 1505, 1437, 1248, 1175, 1118  $\text{cm}^{-1}$ ; **HRMS:**  $[\text{M}+\text{H}]^+$   $m/z$  calcd for  $\text{C}_{36}\text{H}_{26}\text{O}_3\text{P}^+$  537.1614, found 537.1612.

**10-(diphenylphosphoryl)-5-hexyl-11H-benzo[b]fluoren-11-one (3p, new compound)**

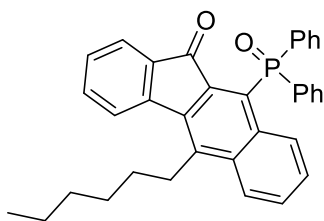

yellow solid; 90.9 mg, 59% yield; **m.p:** 221-223 °C;  **$^1\text{H}$  NMR ( $\text{CDCl}_3$ , 500 MHz):**  $\delta$  9.55 (d,  $J$  = 8.6 Hz, 1H), 8.17 (d,  $J$  = 8.6 Hz, 1H), 7.83-7.78 (m, 5H), 7.74 (t,  $J$  = 8.0 Hz, 1H), 7.57 (t,  $J$  = 8.0 Hz, 1H), 7.52-7.46 (m, 3H), 7.42-7.39 (m, 5H), 7.25 (t,  $J$  = 7.3 Hz, 1H), 3.42-3.39 (m, 2H), 1.87-1.81 (m, 2H), 1.71-1.66 (m, 2H), 1.49-1.39 (m, 4H), 0.96 (t,  $J$  = 7.1 Hz, 3H);  **$^{13}\text{C}\{^1\text{H}\}$  NMR ( $\text{CDCl}_3$ , 125 MHz):**  $\delta$  191.2 (d,  $J$  = 3.3 Hz), 144.4, 139.7 (d,  $J$  = 2.2 Hz), 138.1 (d,  $J$  = 6.6 Hz), 136.4 (d,  $J$

= 6.6 Hz), 163.1 (d,  $J = 8.4$  Hz), 135.4, 135.3 (d,  $J = 3.3$  Hz), 134.6 (d,  $J = 11.1$  Hz), 139.2 (d,  $J = 110.0$  Hz), 131.7 (d,  $J = 4.4$  Hz), 131.4 (d,  $J = 3.3$  Hz), 131.3 (d,  $J = 8.9$  Hz), 129.12, 129.11 (d,  $J = 90.7$  Hz), 126.6, 128.2 (d,  $J = 12.8$  Hz), 127.3, 124.5, 124.4, 124.1, 31.7, 30.0, 29.2, 29.0, 22.7, 14.1;  $^{31}\text{P}$  NMR ( $\text{CDCl}_3$ , 202 MHz):  $\delta$  33.9; FT-IR(film): 1708, 1437, 1177, 1117  $\text{cm}^{-1}$ ; HRMS:  $[\text{M}+\text{Na}]^+$   $m/z$  calcd for  $\text{C}_{35}\text{H}_{31}\text{NaO}_2\text{P}^+$  537.1954, found 537.1950.

**10-(di-*p*-tolylphosphoryl)-5-phenyl-11H-benzo[*b*]fluoren-11-one (3q, new compound)**

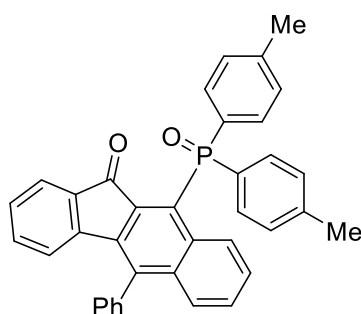

yellow solid; 115.3 mg, 72% yield; **m.p.**: 267-270 °C;  $^1\text{H}$  NMR ( $\text{CDCl}_3$ , 500 MHz):  $\delta$  9.64 (d,  $J = 9.1$  Hz, 1H), 7.79-7.75 (m, 4H), 7.65-7.60 (m, 3H), 7.49-7.48 (m, 2H), 7.45-7.40 (m, 3H), 7.37-7.35 (m, 1H), 7.25-7.24 (m, 4H), 7.13-7.09 (m, 2H), 6.16 (d,  $J = 6.9$  Hz, 1H), 2.38 (s, 6H);  $^{13}\text{C}\{^1\text{H}\}$  NMR ( $\text{CDCl}_3$ , 125 MHz):  $\delta$  191.3 (d,  $J = 3.3$  Hz), 144.2, 142.0 (d,  $J = 2.2$  Hz), 138.8 (d,  $J = 2.2$  Hz), 137.7 (d,  $J = 7.7$  Hz), 137.5, 136.9 (d,  $J = 7.7$  Hz), 136.5 (d,  $J = 6.6$  Hz), 135.5, 135.05 (d,  $J = 11.1$  Hz), 134.98, 131.6 (d,  $J = 11.1$  Hz), 131.5 (d,  $J = 89.6$  Hz), 131.4 (d,  $J = 4.4$  Hz), 131.2 (d,  $J = 111.2$  Hz), 129.7, 129.6, 129.15 (d,  $J = 13.3$  Hz), 129.11, 128.9, 128.8, 127.58, 127.57, 124.3, 114.0, 21.9;  $^{31}\text{P}$  NMR ( $\text{CDCl}_3$ , 202 MHz):  $\delta$  33.4; FT-IR(film): 1712, 1600, 1173, 1116, 1097  $\text{cm}^{-1}$ ; HRMS:  $[\text{M}+\text{Na}]^+$   $m/z$  calcd for  $\text{C}_{37}\text{H}_{27}\text{NaO}_2\text{P}^+$  557.1641, found 557.1638.

**10-(bis(4-methoxyphenyl)phosphoryl)-5-phenyl-11H-benzo[*b*]fluoren-11-one (3r, new compound)**

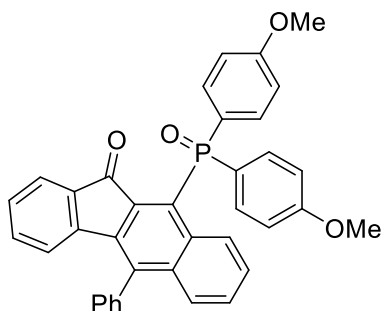

yellow solid; 110.4 mg, 65% yield; **m.p.**: 235-238 °C; **<sup>1</sup>H NMR (CDCl<sub>3</sub>, 500 MHz)**: δ 9.60 (d, *J* = 8.6 Hz, 1H), 7.83-7.80 (m, 4H), 7.64-7.61 (m, 3H), 7.50-7.47 (m, 2H), 7.45-7.42 (m, 1H), 7.41-7.39 (m, 2H), 7.37-7.36 (m, 1H), 7.13-7.09 (m, 2H), 6.96-6.94 (m, 4H), 6.16-6.15 (m, 1H), 3.82 (s, 6H); **<sup>13</sup>C{<sup>1</sup>H} NMR (CDCl<sub>3</sub>, 125 MHz)**: δ 191.4 (d, *J* = 3.3 Hz), 162.2 (d, *J* = 3.3 Hz), 144.1, 138.7 (d, *J* = 2.2 Hz), 137.6 (d, *J* = 6.9 Hz), 137.5, 136.9 (d, *J* = 7.8 Hz), 136.4 (d, *J* = 6.6 Hz), 135.5, 135.04 (d, *J* = 10.8 Hz), 134.97, 133.6 (d, *J* = 11.9 Hz), 132.2 (d, *J* = 89.7 Hz), 131.4 (d, *J* = 3.8 Hz), 129.7, 129.5, 129.1, 128.9, 128.8, 127.54, 127.52, 126.0 (d, *J* = 116.7 Hz), 124.3, 124.0, 113.9 (d, *J* = 13.7 Hz), 55.5; **<sup>31</sup>P NMR (CDCl<sub>3</sub>, 202 MHz)**: δ 32.4; **FT-IR(film)**: 1712, 1597, 1504, 1254, 1179, 1119 cm<sup>-1</sup>; **HRMS**: [M+H]<sup>+</sup> *m/z* calcd for C<sub>37</sub>H<sub>28</sub>O<sub>4</sub>P<sup>+</sup> 567.1720, found 567.1725.

**10-(di([1,1'-biphenyl]-4-yl)phosphoryl)-5-phenyl-11H-benzo[b]fluoren-11-one (3s, new compound)**

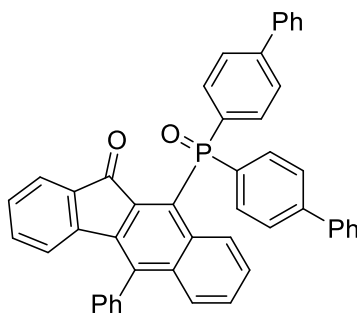

yellow solid; 146.1 mg, 74% yield; **m.p.**: 228-230 °C; **<sup>1</sup>H NMR (CDCl<sub>3</sub>, 500 MHz)**: δ 9.76 (d, *J* = 8.4 Hz, 1H), 8.02-7.98 (m, 4H), 7.71-7.69 (m, 4H), 7.67-7.61 (m, 7H), 7.56-7.53 (m, 2H), 7.50-7.44 (m, 7H), 7.39-7.36 (m, 3H), 7.15-7.10 (m, 2H), 6.19 (d, *J* = 7.4 Hz, 1H); **<sup>13</sup>C{<sup>1</sup>H} NMR (CDCl<sub>3</sub>, 125 MHz)**: δ 191.5 (d, *J* = 3.3 Hz), 144.4 (d, *J* = 3.3 Hz), 144.3, 140.5, 139.1 (d, *J* = 3.3 Hz), 137.8 (d, *J* = 7.7 Hz), 137.4, 137.1 (d, *J* = 7.7 Hz), 136.6 (d, *J* = 6.6 Hz), 135.4, 135.2, 135.1 (d, *J* = 8.8 Hz), 133.0 (d, *J* = 110.6 Hz), 132.1 (d, *J* = 11.1 Hz), 131.4 (d, *J* = 4.4 Hz), 130.7 (d, *J* = 89.6 Hz), 129.8, 129.5, 129.3, 129.10, 129.05, 128.92, 128.2, 127.8, 127.7, 127.5, 127.2 (d, *J* = 13.3 Hz), 124.4, 124.0; **<sup>31</sup>P NMR (CDCl<sub>3</sub>, 202 MHz)**: δ 33.4; **FT-IR(film)**: 1710, 1598, 1483, 1171, 1120 cm<sup>-1</sup>; **HRMS**: [M+H]<sup>+</sup> *m/z* calcd for C<sub>47</sub>H<sub>32</sub>O<sub>2</sub>P<sup>+</sup> 659.2134 found 659.2134.

**10-(bis(4-(tert-butyl)phenyl)phosphoryl)-5-phenyl-11H-benzo[b]fluoren-11-one (3t, new compound)**



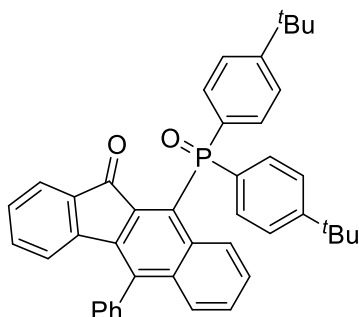

yellow solid; 61.2 mg, 33% yield; **m.p.**: 255-257 °C; **<sup>1</sup>H NMR (CDCl<sub>3</sub>, 500 MHz)**: δ 9.67 (d, *J* = 8.8 Hz, 1H), 7.82-7.79 (m, 4H), 7.66-7.60 (m, 3H), 7.51-7.45 (m, 7H), 7.42-7.40 (m, 2H), 7.31-7.30 (m, 1H), 7.14-7.09 (m, 2H), 6.17 (d, *J* = 6.9 Hz, 1H), 1.31 (s, 18H); **<sup>13</sup>C{<sup>1</sup>H} NMR (CDCl<sub>3</sub>, 125 MHz)**: δ 191.0 (d, *J* = 3.3 Hz), 154.7 (d, *J* = 3.1 Hz), 144.0, 138.6 (d, *J* = 3.0 Hz), 137.6 (d, *J* = 6.8 Hz), 137.3, 136.7 (d, *J* = 7.8 Hz), 136.4 (d, *J* = 6.5 Hz), 135.4, 134.76 (d, *J* = 9.8 Hz), 134.75, 131.4 (d, *J* = 89.6 Hz), 131.33 (d, *J* = 10.9 Hz), 131.26 (d, *J* = 4.4 Hz), 130.9 (d, *J* = 110.2 Hz), 129.5, 129.3, 128.9, 128.7, 128.6, 127.40, 127.36, 125.2 (d, *J* = 13.1 Hz), 123.9, 123.8, 35.0, 31.1; **<sup>31</sup>P NMR (CDCl<sub>3</sub>, 202 MHz)**: δ 33.6; **FT-IR(film)**: 1712, 1599, 1470, 1177, 1092 cm<sup>-1</sup>; **HRMS**: [M+Na]<sup>+</sup> *m/z* calcd for C<sub>43</sub>H<sub>39</sub>NaO<sub>2</sub>P<sup>+</sup> 641.2580 found 641.2574.

**10-(bis(3,5-dimethylphenyl)phosphoryl)-5-phenyl-11H-benzo[b]fluoren-11-one (3u, new compound)**

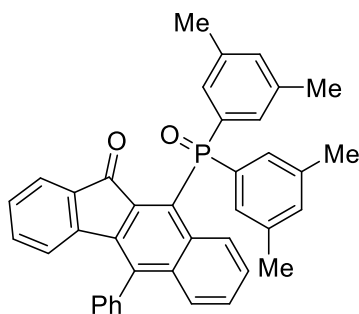

yellow solid; 82.6 mg, 49% yield; **m.p.**: 265-268 °C; **<sup>1</sup>H NMR (CDCl<sub>3</sub>, 500 MHz)**: δ 9.62 (d, *J* = 9.1 Hz, 1H), 7.66-7.60 (m, 3H), 7.52-7.43 (m, 9H), 7.38 (d, *J* = 7.8 Hz, 1H), 7.14-7.09 (m, 4H), 6.20-6.18 (m, 1H), 2.31 (s, 12H); **<sup>13</sup>C{<sup>1</sup>H} NMR (CDCl<sub>3</sub>, 125 MHz)**: δ 191.0 (d, *J* = 3.3 Hz), 144.0, 138.6 (d, *J* = 2.2 Hz), 137.7 (d, *J* = 17.3 Hz), 137.6 (d, *J* = 6.6 Hz), 137.3, 136.8 (d, *J* = 7.7 Hz), 136.3 (d, *J* = 6.6 Hz), 135.4, 134.8 (d, *J* = 9.9 Hz), 134.7, 133.9 (d, *J* = 108.9 Hz), 133.3 (d, *J* = 3.3 Hz), 131.2 (d, *J* = 4.4 Hz), 131.0 (d, *J* = 86.9 Hz), 129.5, 129.4, 129.0 (d, *J* = 9.9 Hz), 128.9, 128.72, 128.66, 127.4, 127.3, 124.2, 123.8, 21.5; **<sup>31</sup>P NMR (CDCl<sub>3</sub>, 202 MHz)**: δ 34.4; **FT-IR(film)**: 1712,

1600, 1470, 1175, 1131  $\text{cm}^{-1}$ ; **HRMS:**  $[\text{M}+\text{Na}]^+$   $m/z$  calcd for  $\text{C}_{39}\text{H}_{31}\text{NaO}_2\text{P}^+$  585.1954 found 585.1954.

**10-(bis(4-fluorophenyl)phosphoryl)-5-phenyl-11H-benzo[b]fluoren-11-one** (3v, new compound)

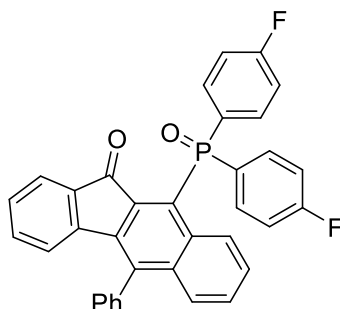

yellow solid; 105.7 mg, 65% yield; **m.p:** 248-250  $^{\circ}\text{C}$ ;  **$^1\text{H}$  NMR ( $\text{CDCl}_3$ , 500 MHz):**  $\delta$  9.63 (d,  $J = 8.5$  Hz, 1H), 7.93-7.86 (m, 3H), 7.66-7.61 (m, 3H), 7.54-7.40 (m, 8H), 7.36-7.34 (m, 1H), 7.15-7.09 (m, 4H), 6.18 (d,  $J = 7.0$  Hz, 1H);  **$^{13}\text{C}\{^1\text{H}\}$  NMR ( $\text{CDCl}_3$ , 125 MHz):**  $\delta$  191.3 (d,  $J = 4.4$  Hz), 164.7 (d,  $J = 252.6$  Hz), 144.0, 139.0, 137.6 (d,  $J = 6.6$  Hz), 137.1, 136.5 (dd,  $J_1 = 8.0$  Hz,  $J_2 = 5.7$  Hz), 135.11, 135.06, 134.9 (d,  $J = 9.6$  Hz), 134.0 (dd,  $J_1 = 9.6$  Hz,  $J_2 = 9.0$  Hz), 131.7, 131.3 (d,  $J = 10.2$  Hz), 131.0, 129.6, 129.3, 129.1, 128.9, 128.8, 128.4 (d,  $J = 11.9$  Hz), 127.6, 127.5, 124.2, 123.8, 115.5 (dd,  $J_1 = 21.1$  Hz,  $J_2 = 12.8$  Hz);  **$^{31}\text{P}$  NMR ( $\text{CDCl}_3$ , 202 MHz):**  $\delta$  32.7;  **$^{19}\text{F}\{^1\text{H}\}$  NMR (471 MHz,  $\text{CDCl}_3$ ):**  $\delta$  -105.80; **FT-IR(film):** 1712, 1592, 1498, 1161, 1116  $\text{cm}^{-1}$ ; **HRMS:**  $[\text{M}+\text{H}]^+$   $m/z$  calcd for  $\text{C}_{35}\text{H}_{22}\text{F}_2\text{O}_2\text{P}^+$  543.1320, found 543.1320.

**10-(bis(4-chlorophenyl)phosphoryl)-5-phenyl-11H-benzo[b]fluoren-11-one** (3w, new compound)

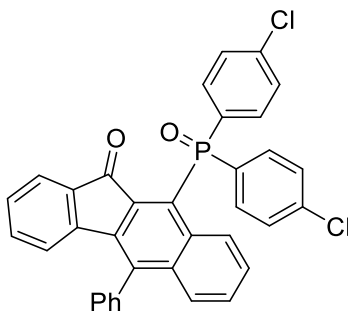

yellow solid; 113.7 mg, 61% yield; **m.p:** 271-273  $^{\circ}\text{C}$ ;  **$^1\text{H}$  NMR ( $\text{CDCl}_3$ , 500 MHz):**  $\delta$  9.63 (d,  $J = 8.5$  Hz, 1H), 7.82-7.79 (m, 4H), 7.66-7.61 (m, 3H), 7.53-7.46 (m, 3H), 7.43-7.37 (m, 7H), 7.16-

7.12 (m, 2H), 6.18-6.16 (m, 1H);  $^{13}\text{C}\{^1\text{H}\}$  NMR ( $\text{CDCl}_3$ , 125 MHz):  $\delta$  191.5 (d,  $J = 2.1$  Hz), 144.2, 139.4, 138.3 (d,  $J = 2.2$  Hz), 137.7 (d,  $J = 7.0$  Hz), 137.2, 137.1 (d,  $J = 8.0$  Hz), 136.3 (d,  $J = 7.8$  Hz), 135.4, 135.2, 135.1 (d,  $J = 8.7$  Hz), 133.0 (d,  $J = 11.3$  Hz), 132.5 (d,  $J = 111.4$  Hz), 131.0 (d,  $J = 3.1$  Hz), 129.8, 129.5 (d,  $J = 90.7$  Hz), 129.44, 129.43, 129.2, 129.0, 138.9 (d,  $J = 13.4$  Hz), 127.9, 127.8, 124.5, 124.1;  $^{31}\text{P}$  NMR ( $\text{CDCl}_3$ , 202 MHz):  $\delta$  32.0; FT-IR(film): 1709, 1481, 1275, 1180, 1086  $\text{cm}^{-1}$ ; HRMS:  $[\text{M}+\text{H}]^+$  m/z calcd for  $\text{C}_{35}\text{H}_{22}\text{Cl}_2\text{O}_2\text{P}^+$  575.0729, found 575.0735.

**10-(hexyl(phenyl)phosphoryl)-5-phenyl-11H-benzo[b]fluoren-11-one (3x, new compound)**

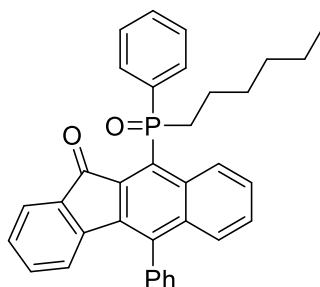

yellow solid; 83.3 mg, 54% yield; m.p: 209-211  $^{\circ}\text{C}$ ;  $^1\text{H}$  NMR ( $\text{CDCl}_3$ , 500 MHz):  $\delta$  10.23 (d,  $J = 8.7$  Hz, 1H), 7.82-7.79 (m, 2H), 7.64-7.60 (m, 3H), 7.58-7.56 (m, 1H), 7.49-7.47 (m, 3H), 7.44-7.39 (m, 5H), 7.15-7.11 (m, 2H), 6.14-6.12 (m, 1H), 3.03-2.96 (m, 1H), 2.88-2.80 (m, 1H), 1.62-1.55 (m, 1H), 1.47-1.39 (m, 2H), 1.26-1.20 (m, 5H), 0.79 (t,  $J = 6.9$  Hz, 3H);  $^{13}\text{C}\{^1\text{H}\}$  NMR ( $\text{CDCl}_3$ , 125 MHz):  $\delta$  192.3 (d,  $J = 3.3$  Hz), 144.3, 138.9 (d,  $J = 2.2$  Hz), 137.4, 137.3 (d,  $J = 5.5$  Hz), 136.9 (d,  $J = 7.7$  Hz), 136.4 (d,  $J = 103.9$  Hz), 135.9 (d,  $J = 7.7$  Hz), 135.31 (d,  $J = 11.1$  Hz), 135.28 (d,  $J = 9.9$  Hz), 131.3 (d,  $J = 2.2$  Hz), 131.2 (d,  $J = 2.2$  Hz), 130.9 (d,  $J = 79.6$  Hz), 130.0 (d,  $J = 16.6$  Hz), 129.9 (d,  $J = 9.9$  Hz), 129.7 (d,  $J = 2.2$  Hz), 129.5, 129.3, 128.9, 128.8, 128.4 (d,  $J = 12.2$  Hz), 127.9, 127.5, 124.4, 124.0, 31.5, 30.9 (d,  $J = 15.6$  Hz), 29.7 (d,  $J = 73.5$  Hz), 22.6, 22.4 (d,  $J = 3.9$  Hz), 14.2;  $^{31}\text{P}$  NMR ( $\text{CDCl}_3$ , 202 MHz):  $\delta$  42.8; FT-IR(film): 1716, 1437, 1322, 1281, 1127  $\text{cm}^{-1}$ ; HRMS:  $[\text{M}+\text{H}]^+$  m/z calcd for  $\text{C}_{35}\text{H}_{32}\text{O}_2\text{P}^+$  515.2134 found 515.2136..

**(11-butyl-11-hydroxy-5-phenyl-11H-benzo[b]fluoren-10-yl)diphenylphosphine oxide (5a, new compound)**

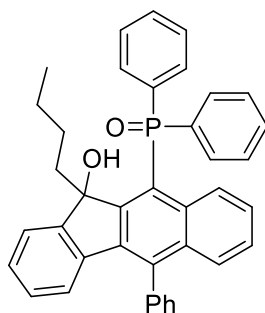

Light yellow solid; 68.8 mg, 61% yield; **m.p.**: 202-203 °C; **<sup>1</sup>H NMR (CDCl<sub>3</sub>, 500 MHz)**: δ 8.51 (s, 1H), 8.00-7.95 (m, 2H), 7.73-7.51 (m, 11H), 7.48-7.37 (m, 5H), 7.25 (t, *J* = 7.5 Hz, 1H), 7.22 (t, *J* = 7.7 Hz, 1H), 7.02-6.98 (m, 2H), 6.18 (d, *J* = 7.9 Hz, 1H), 2.82-2.74 (m, 1H), 2.26-2.19 (m, 1H), 0.88-0.77 (m, 1H), 0.62- 0.52 (m, 3H), 0.45 (t, *J* = 7.0 Hz, 3H); **<sup>13</sup>C{<sup>1</sup>H} NMR (CDCl<sub>3</sub>, 125 MHz)**: δ 160.0 (d, *J* = 6.8 Hz), 149.7, 138.7 (d, *J* = 2.8 Hz), 138.3, 137.8, 137.4 (d, *J* = 11.9 Hz), 136.1 (d, *J* = 107.7 Hz), 133.8 (d, *J* = 8.7 Hz), 132.6 (d, *J* = 3.6 Hz), 132.59 (d, *J* = 3.6 Hz), 132.57 (d, *J* = 10.3 Hz), 131.7 (d, *J* = 2.4 Hz), 131.5 (d, *J* = 103.7 Hz), 131.1 (d, *J* = 10.7 Hz), 129.7, 129.472, 129.465 (d, *J* = 10.3 Hz), 129.0 (d, *J* = 11.5 Hz), 128.9, 128.83, 128.80, 128.3, 128.2 (d, *J* = 7.6 Hz), 128.1, 127.3, 125.7, 125.2, 123.4, 123.3, 121.8 (d, *J* = 96.6 Hz), 83.8. (d, *J* = 3.2 Hz), 42.1, 26.6, 22.5, 13.7; **<sup>31</sup>P NMR (CDCl<sub>3</sub>, 202 MHz)**: δ 35.3; **FT-IR(film)**: 3626, 1437, 1154, 1117, 1098 cm<sup>-1</sup>; **HRMS**: [M+H]<sup>+</sup> *m/z* calcd for C<sub>39</sub>H<sub>34</sub>O<sub>2</sub>P<sup>+</sup> 565.2291 found 565.2294.

**10-(diphenylphosphoryl)-7-(4-methoxyphenyl)-5-phenyl-11H-benzo[b]fluoren-11-one (5b, new compound)**

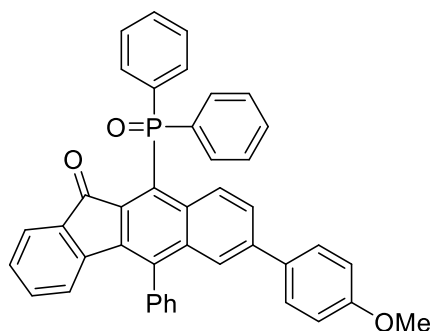

yellow solid; 99.1 mg, 81% yield; **m.p.**: 271-273 °C; **<sup>1</sup>H NMR (CDCl<sub>3</sub>, 500 MHz)**: δ 9.74 (d, *J* = 9.3 Hz, 1H), 7.96 (m, 4H), 7.76 (d, *J* = 9.1 Hz, 1H), 7.67-7.62 (m, 4H), 7.54-7.45 (m, 10H), 7.36 (d, *J* = 8.4 Hz, 1H), 7.15-7.09 (m, 2H), 7.94 (d, *J* = 8.1 Hz, 2H), 6.18 (t, *J* = 7.7 Hz, 1H), 3.81 (s, 3H); **<sup>13</sup>C{<sup>1</sup>H} NMR (CDCl<sub>3</sub>, 125 MHz)**: δ 191.2 (d, *J* = 3.6 Hz), 159.9, 144.1, 141.2, 139.0 (d, *J* = 2.3 Hz), 137.3, 137.2 (d, *J* = 6.8 Hz), 135.6 (d, *J* = 11.5 Hz), 135.5, 135.3 (d, *J* = 6.6 Hz), 135.0, 134.7,

133.1 (d,  $J = 101.3$  Hz), 129.8, 129.5, 129.0, 128.9, 128.5 (d,  $J = 11.1$  Hz), 128.3, 126.8, 124.5, 124.2, 124.0, 114.6, 55.5;  **$^{31}\text{P}$  NMR (CDCl<sub>3</sub>, 202 MHz):**  $\delta$  33.8; **FT-IR(film):** 1708, 1605, 1493, 1249, 1178 cm<sup>-1</sup>; **HRMS:** [M+H]<sup>+</sup> m/z calcd for C<sub>42</sub>H<sub>30</sub>O<sub>3</sub>P<sup>+</sup> 613.1927 found 613.1932.

#### 4. Photophysical properties of the selected products

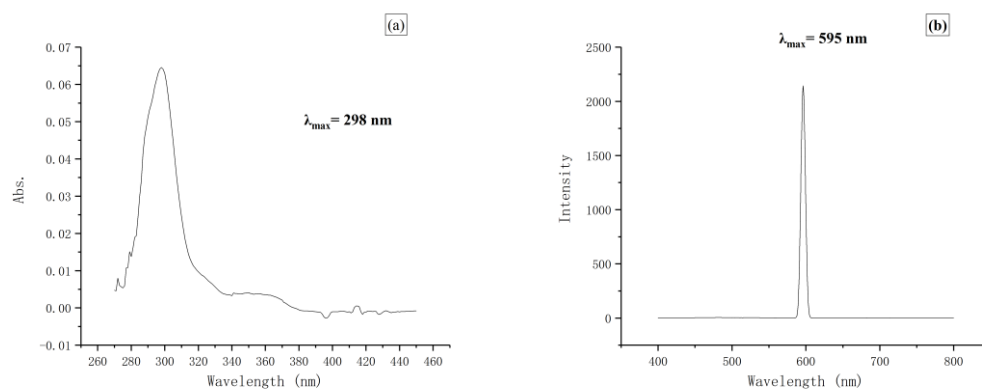

**Figure S1.** (a) Photoluminescence absorption spectrum of **3e** in solution of EtOH ( $5 \times 10^{-6}$  M). (b) Photoluminescence emission spectrum of **3e** in solution of EtOH ( $5 \times 10^{-6}$  M) upon excitation at 298 nm.

**PL quantum yield of 3e**,  $\Phi_u = \Phi_s \times F_u/F_s \times A_s/A_u = 33.1\%$  (Using Rhodamine 6G as a reference)

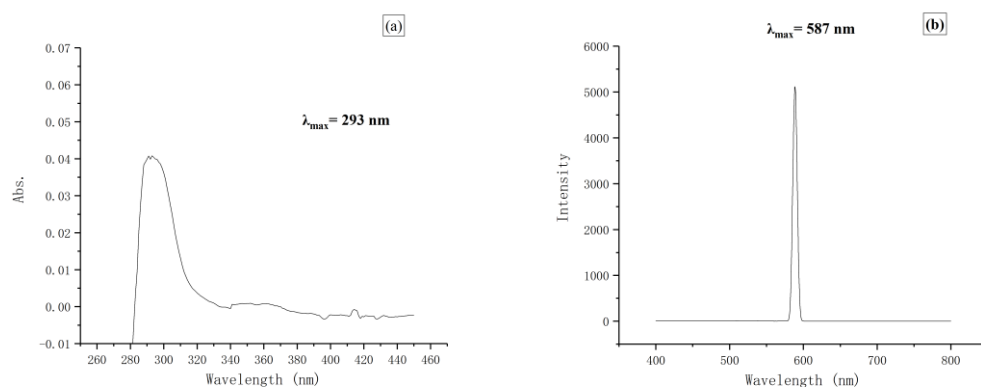

**Figure S2.** (a) Photoluminescence absorption spectrum of **3g** in solution of EtOH ( $2.5 \times 10^{-6}$  M). (b) Photoluminescence emission spectrum of **3g** in solution of EtOH ( $2.5 \times 10^{-6}$  M) upon excitation at 293 nm.

**PL quantum yield of 3e**,  $\Phi_u = \Phi_s \times F_u/F_s \times A_s/A_u = 24.8\%$  (Using Rhodamine 6G as a reference)

## 5. NMR spectrum of isolated products

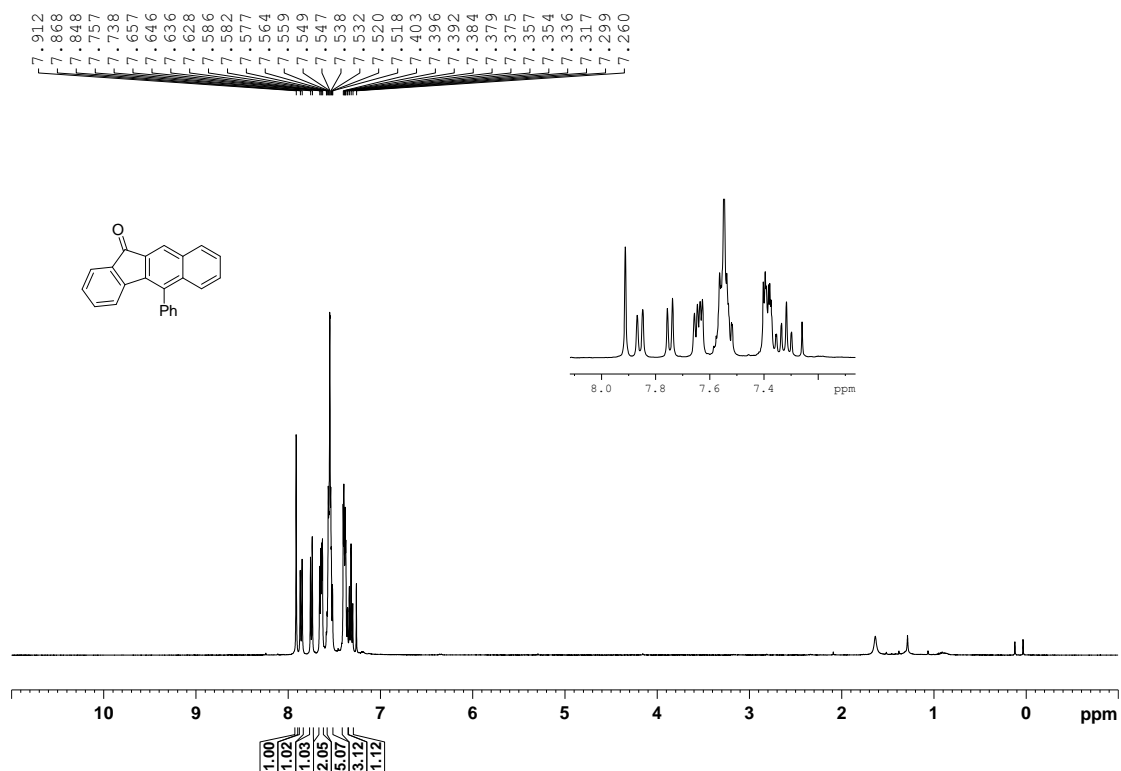

<sup>1</sup>H NMR (500 MHz, CDCl<sub>3</sub>) spectrum of compound **3a'**

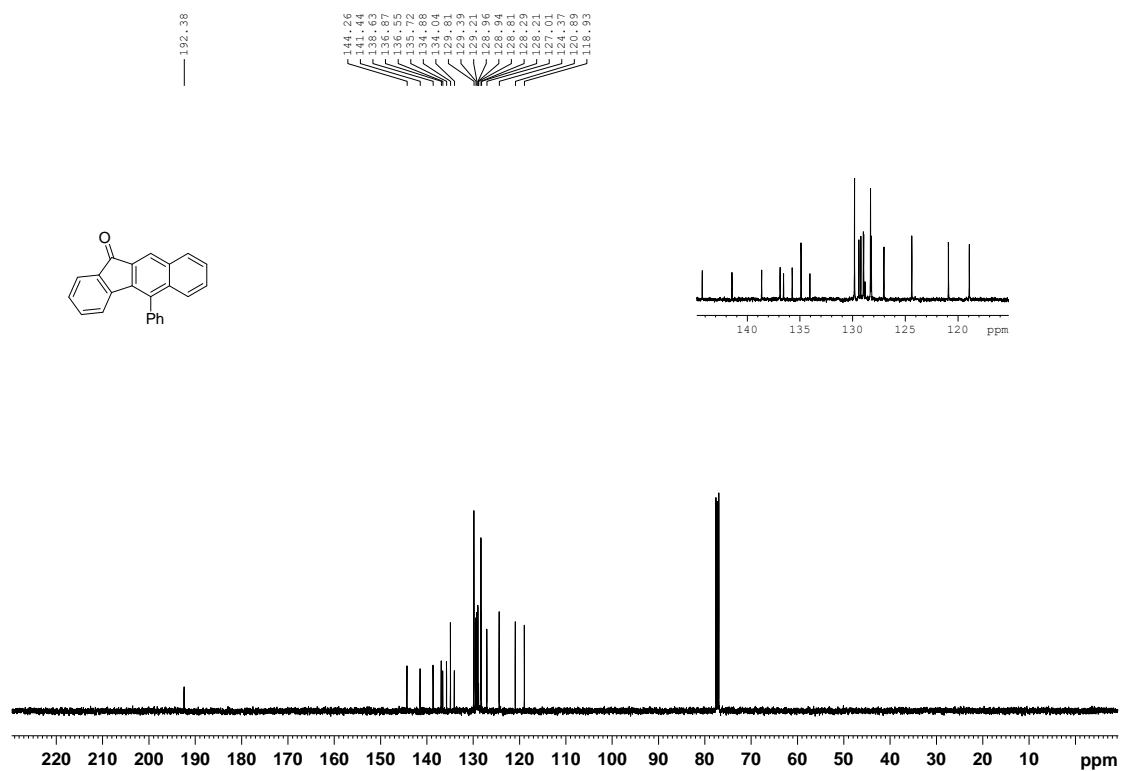

<sup>13</sup>C {<sup>1</sup>H} NMR (125 MHz, CDCl<sub>3</sub>) spectrum of compound **3a'**

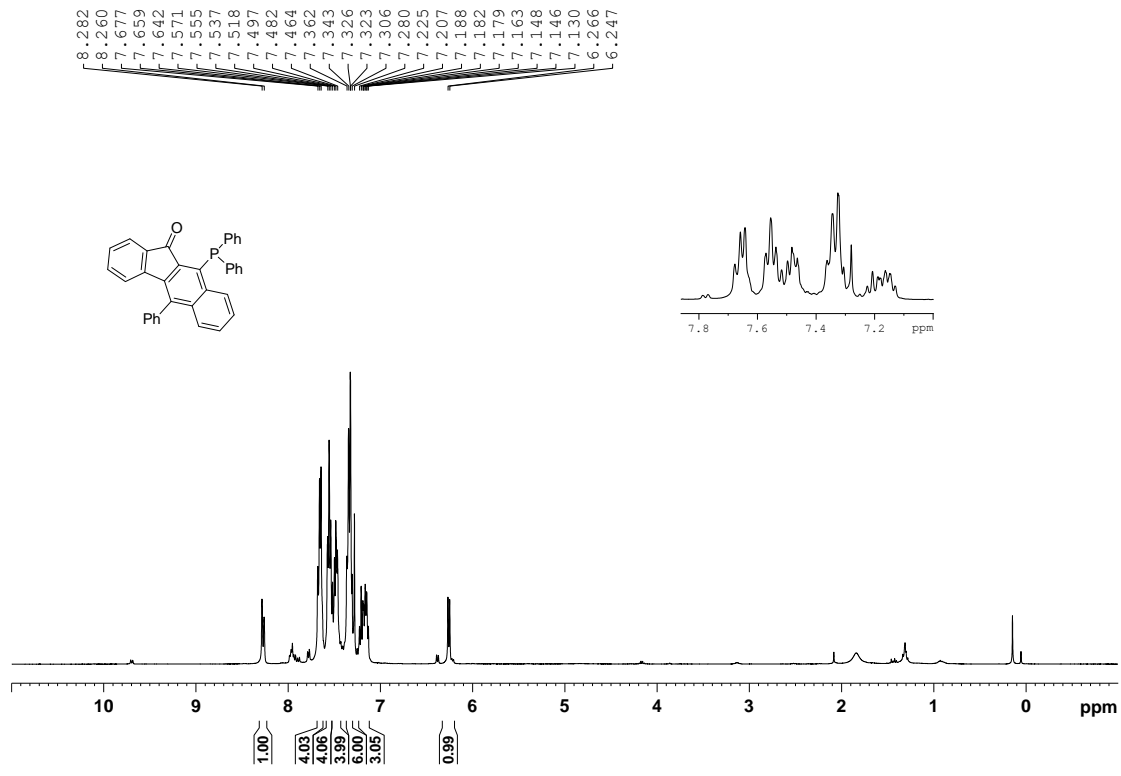

$^1\text{H}$  NMR (500 MHz,  $\text{CDCl}_3$ ) spectrum of compound without oxidation

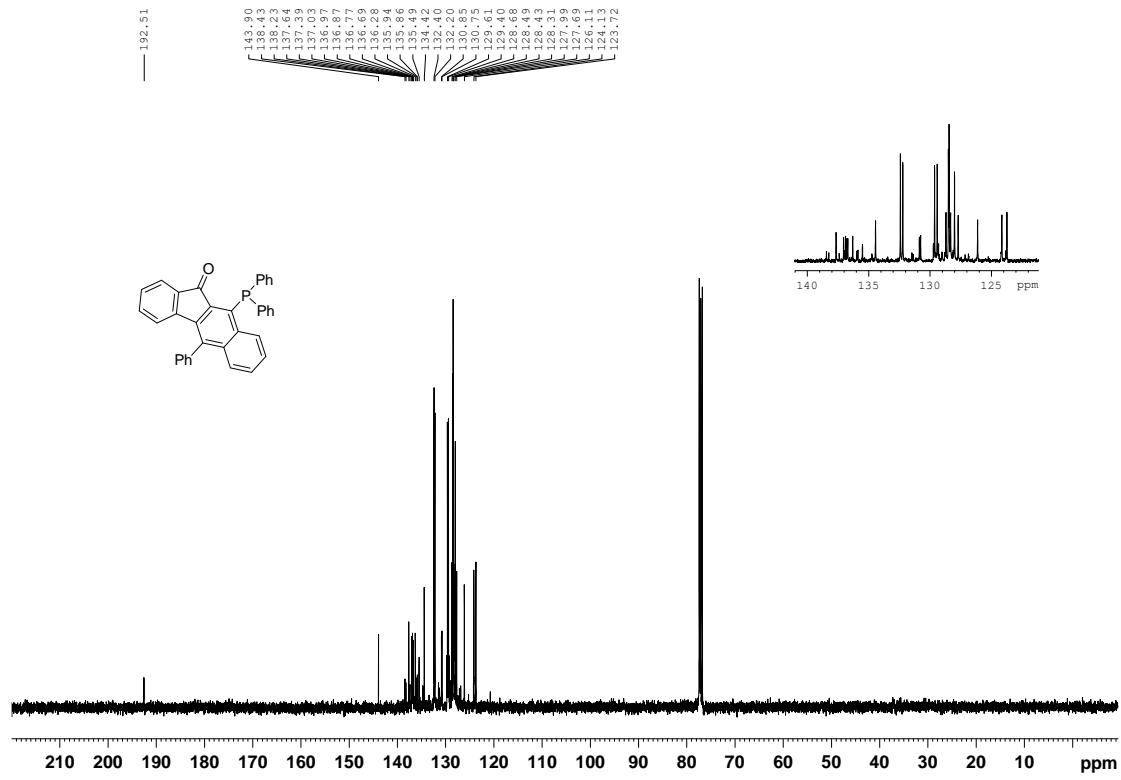

$^{13}\text{C}\{^1\text{H}\}$  NMR (125 MHz,  $\text{CDCl}_3$ ) spectrum of compound without oxidation



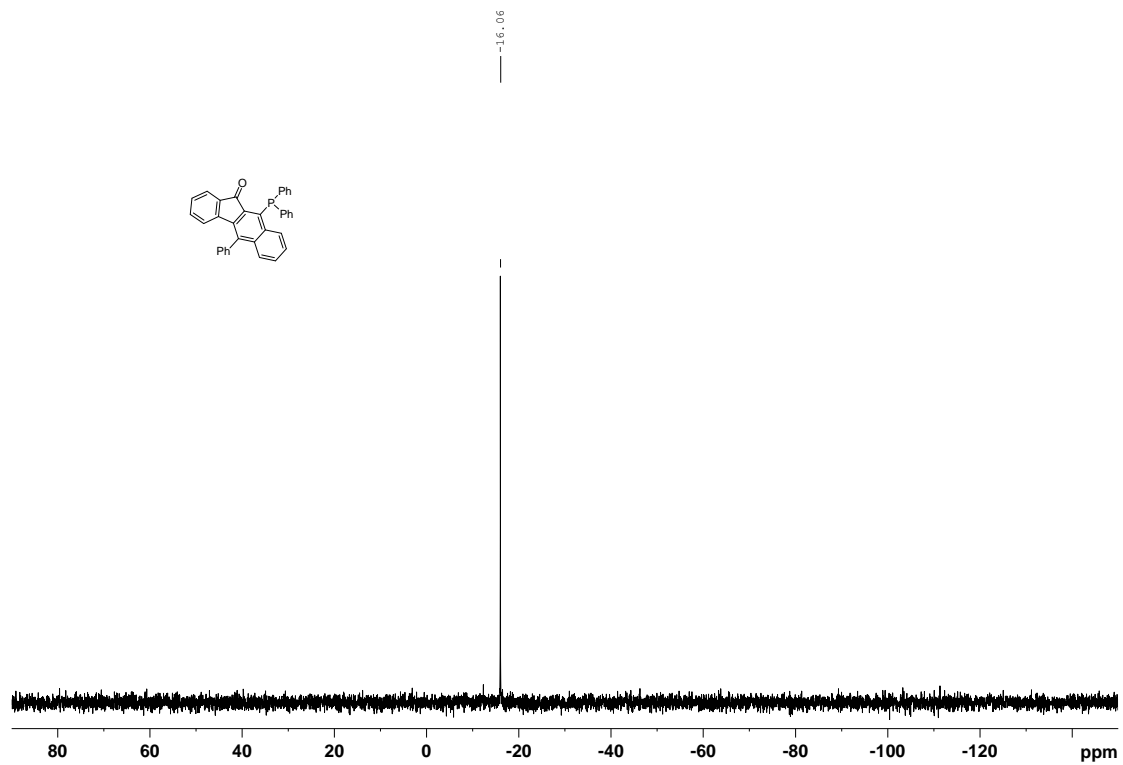

$^{31}\text{P}\{^1\text{H}\}$  NMR (202 MHz,  $\text{CDCl}_3$ ) spectrum of compound without oxidation

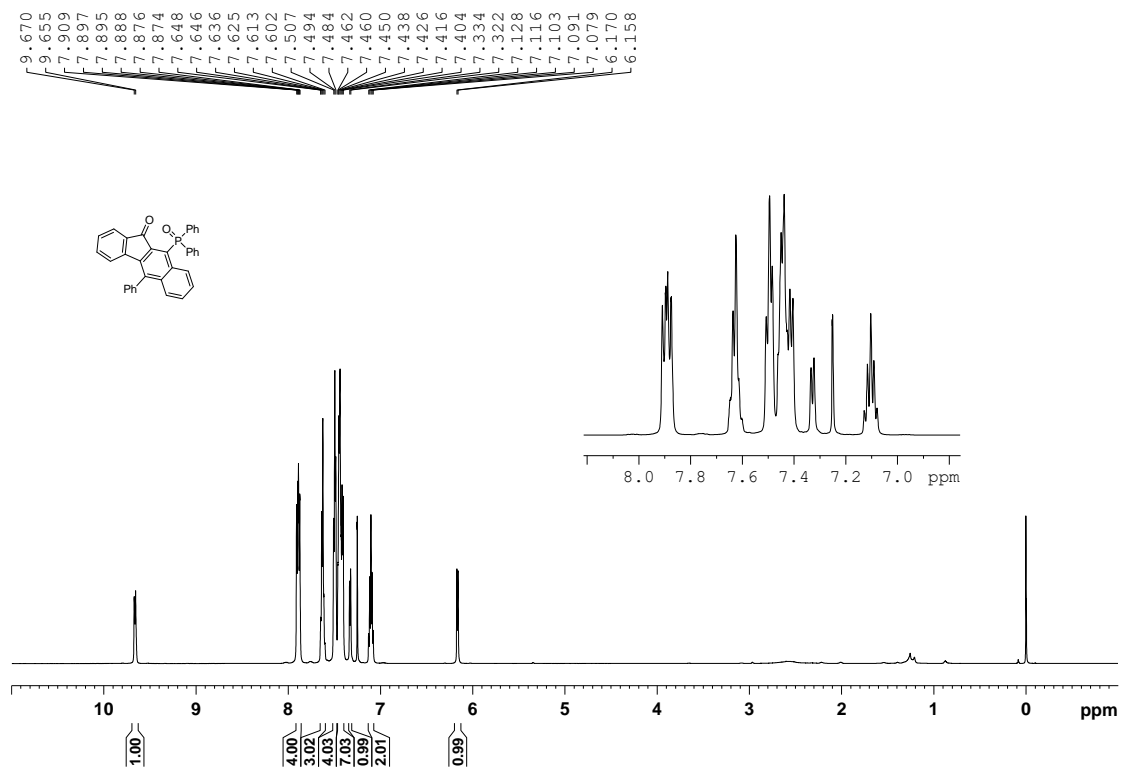

$^1\text{H}$  NMR (500 MHz,  $\text{CDCl}_3$ ) spectrum of compound 3a

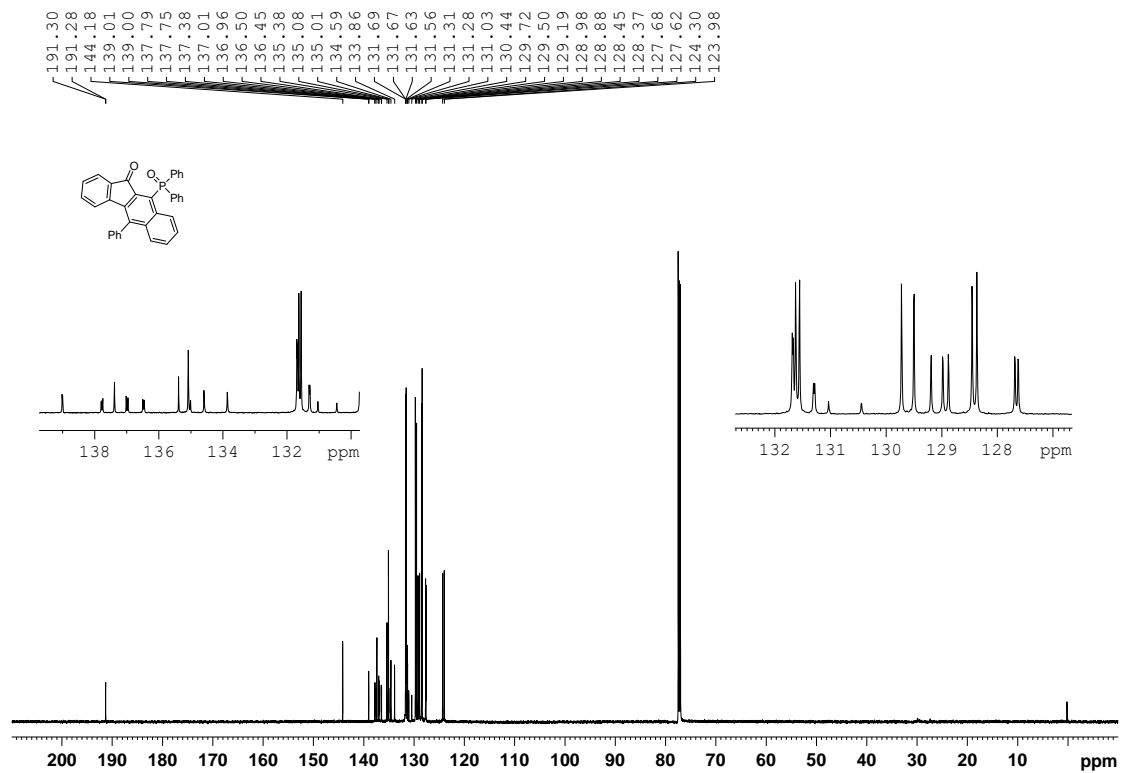

$^{13}\text{C}\{^1\text{H}\}$  NMR (125 MHz,  $\text{CDCl}_3$ ) spectrum of compound **3a**

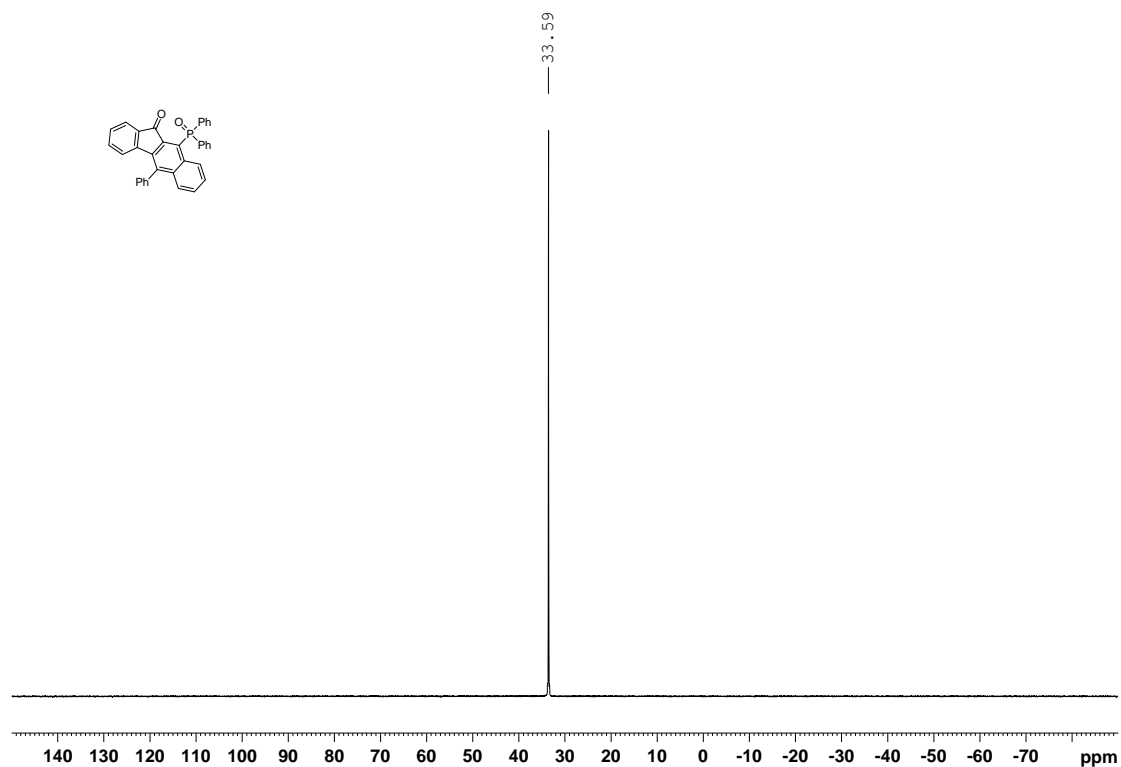

$^{31}\text{P}\{^1\text{H}\}$  NMR (202 MHz,  $\text{CDCl}_3$ ) spectrum of compound **3a**

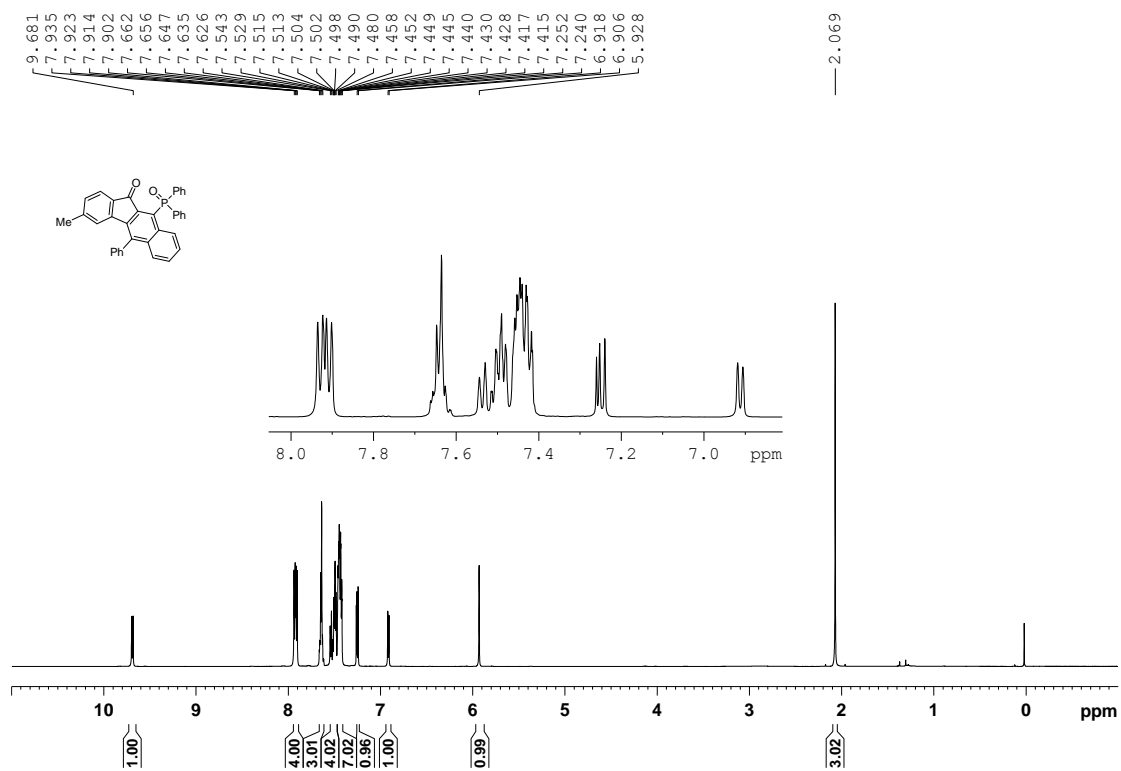

$^1\text{H NMR}$  (500 MHz,  $\text{CDCl}_3$ ) spectrum of compound **3b**

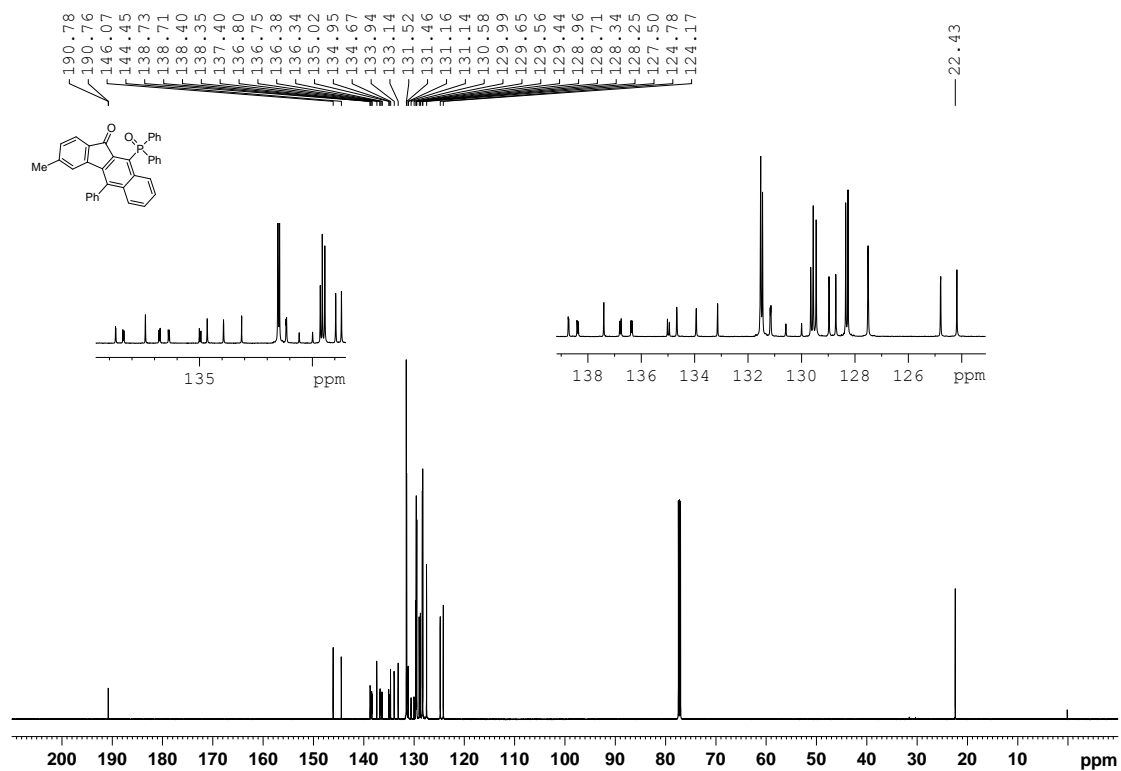

$^{13}\text{C}\{^1\text{H}\}$  NMR (125 MHz,  $\text{CDCl}_3$ ) spectrum of compound **3b**

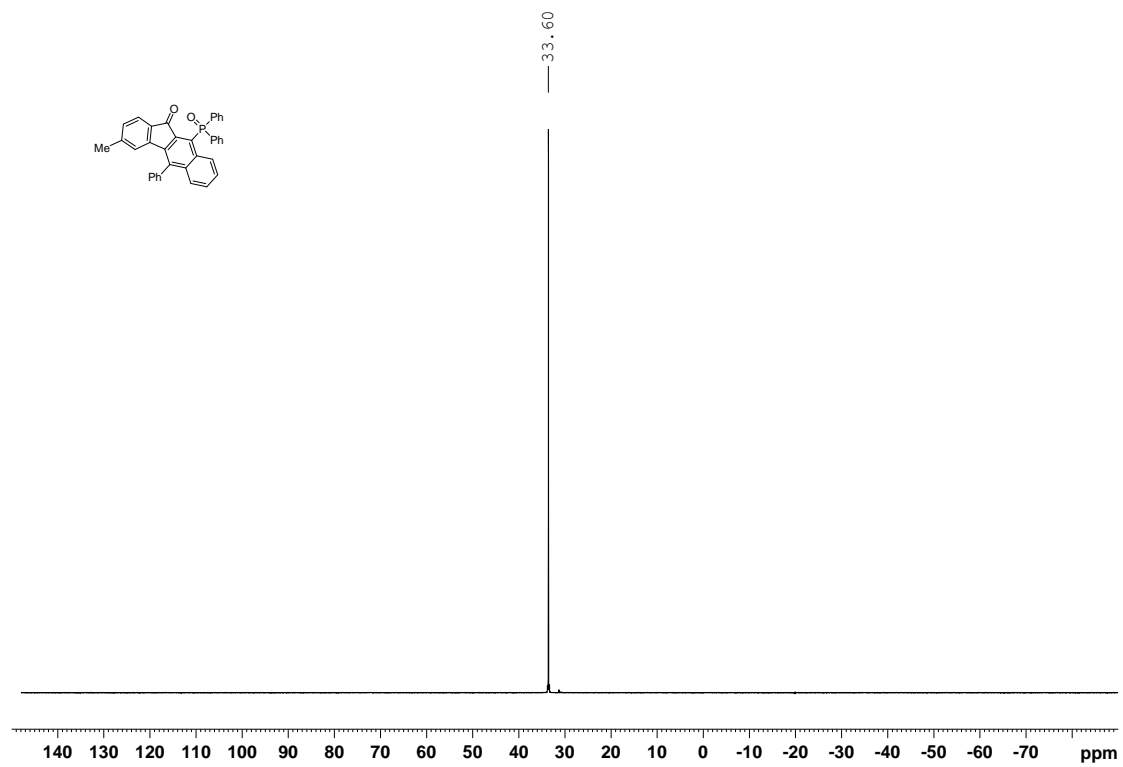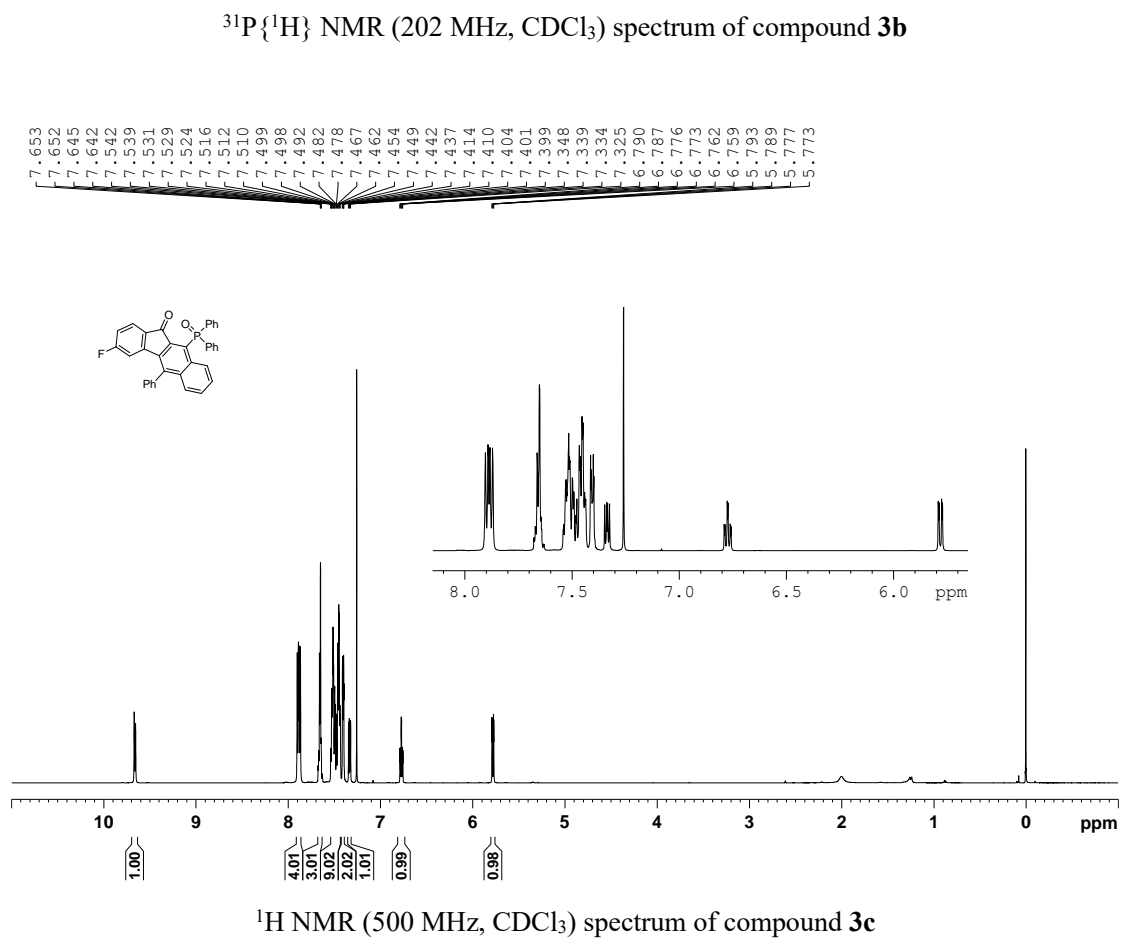

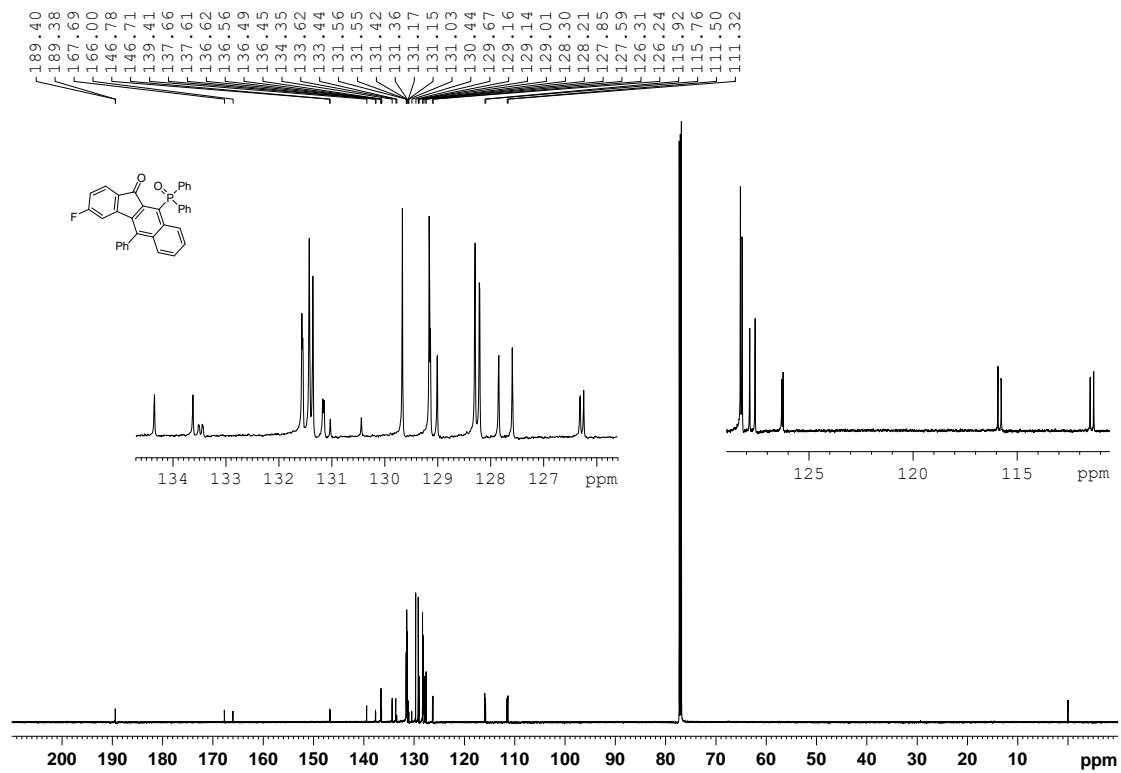

<sup>13</sup>C{<sup>1</sup>H} NMR (125 MHz, CDCl<sub>3</sub>) spectrum of compound **3c**

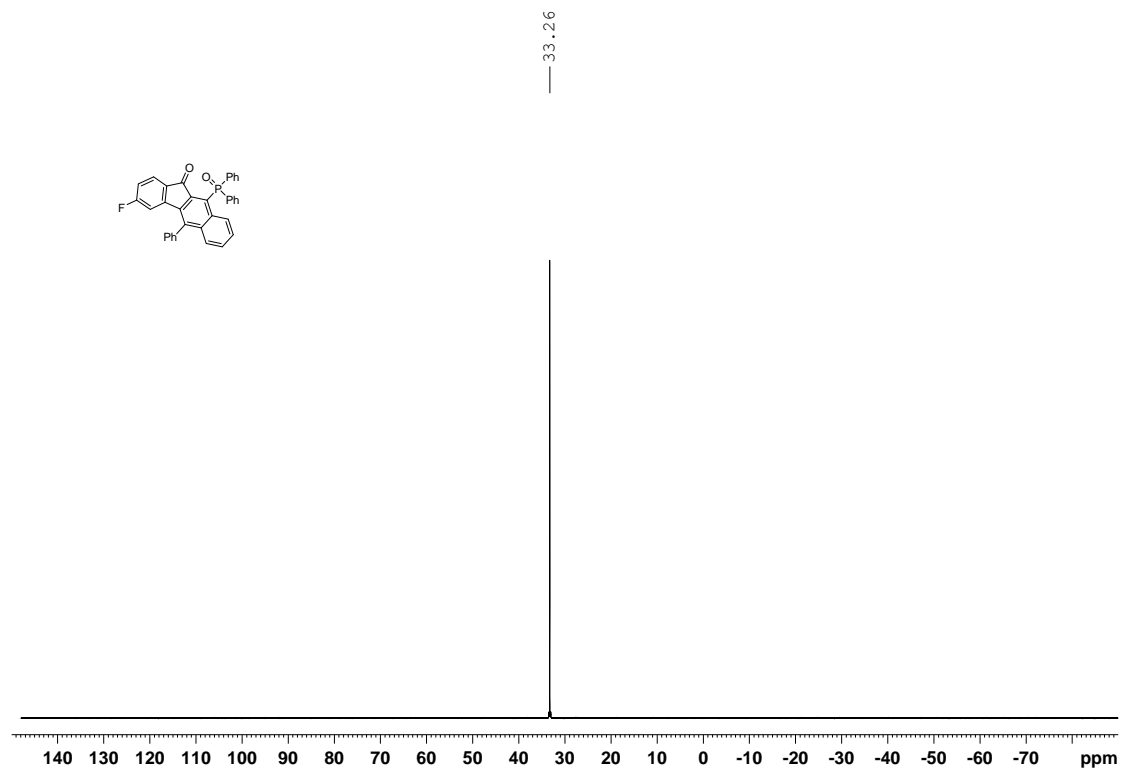

<sup>31</sup>P{<sup>1</sup>H} NMR (202 MHz, CDCl<sub>3</sub>) spectrum of compound **3c**

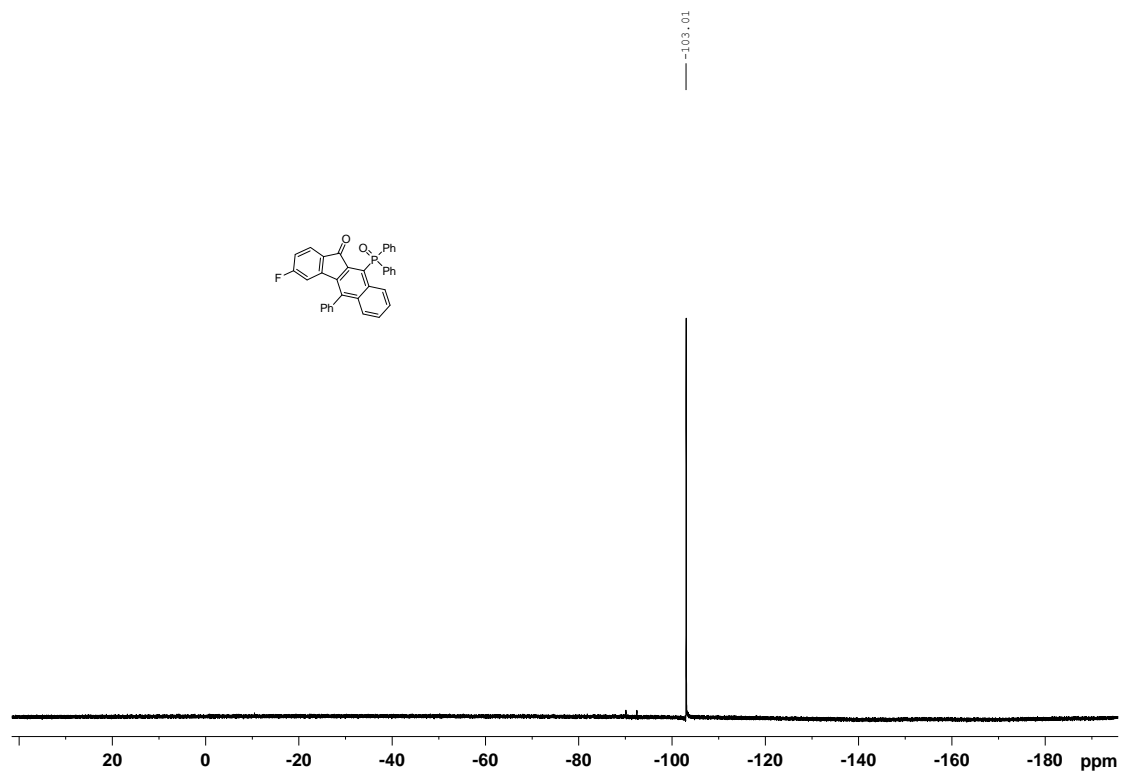

$^{19}\text{F}$  { $^1\text{H}$ } NMR (471 MHz,  $\text{CDCl}_3$ ) spectrum of compound **3c**

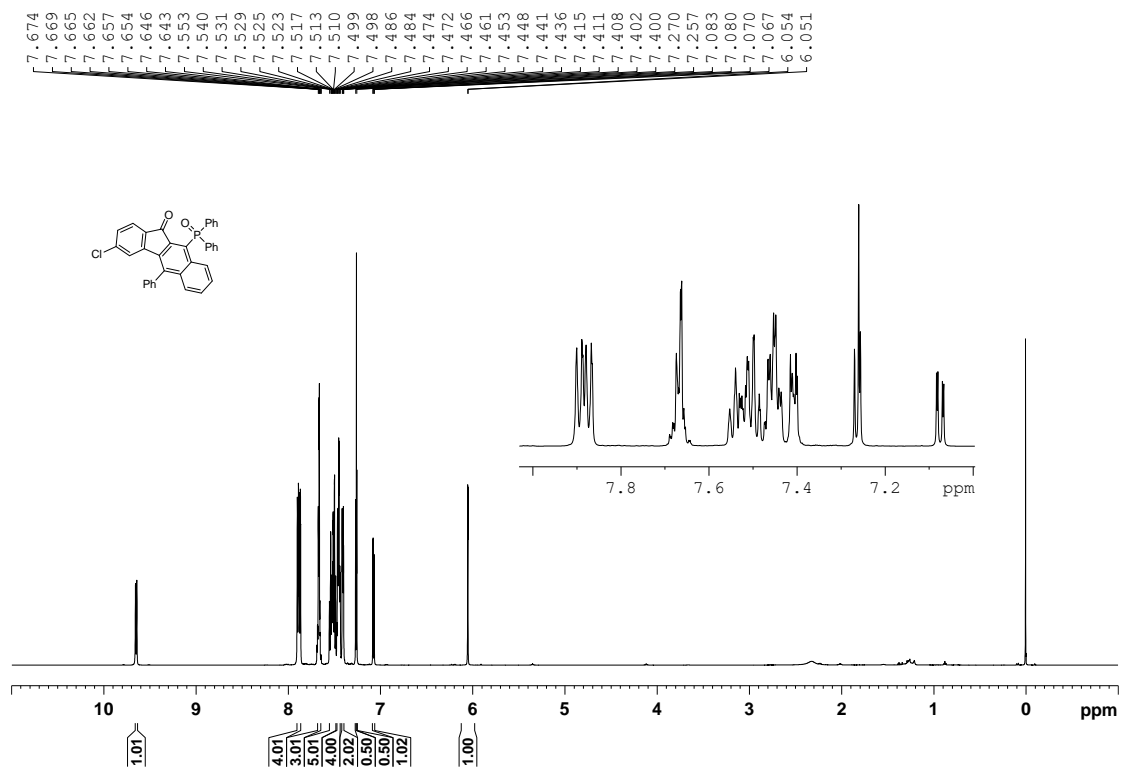

$^1\text{H}$  NMR (500 MHz,  $\text{CDCl}_3$ ) spectrum of compound **3d**

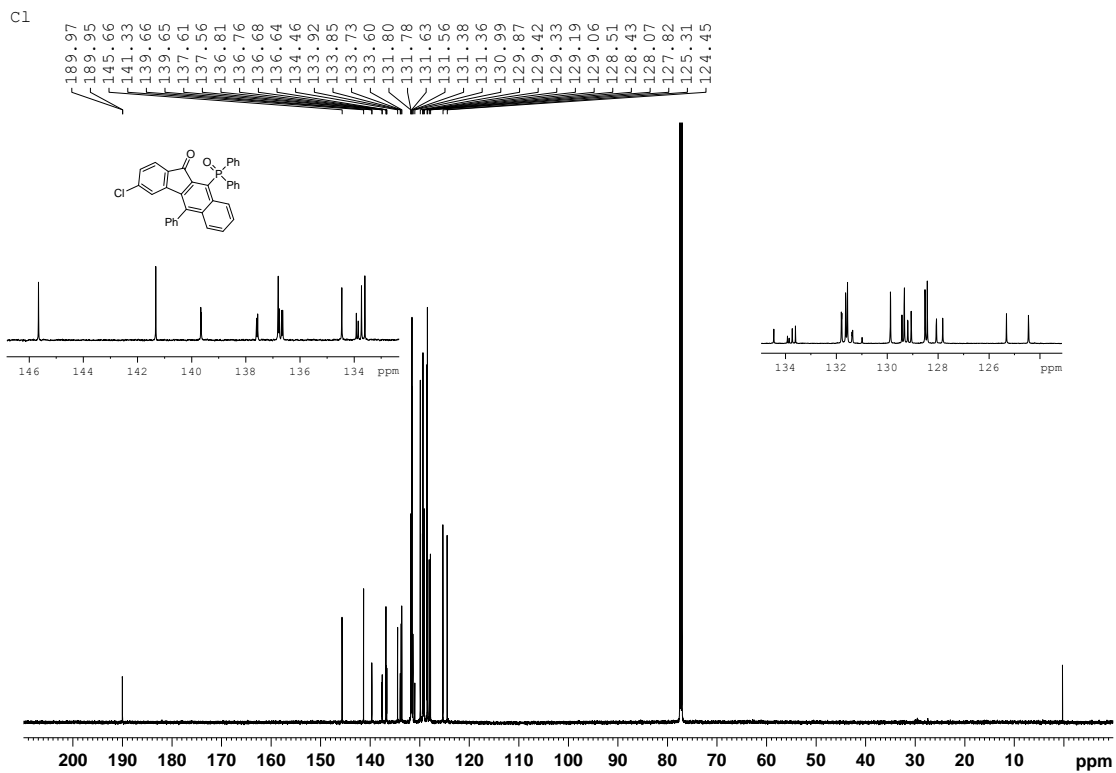

$^{13}\text{C}\{^1\text{H}\}$  NMR (125 MHz,  $\text{CDCl}_3$ ) spectrum of compound **3d**

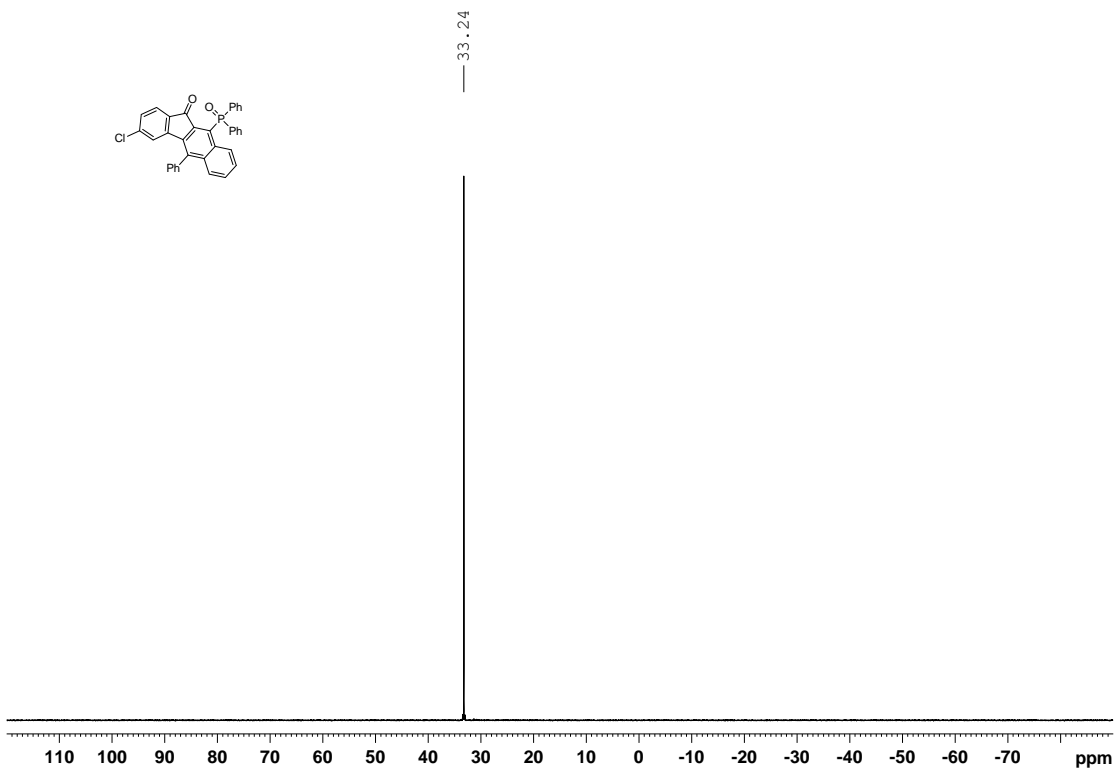

$^{31}\text{P}\{^1\text{H}\}$  NMR (202 MHz,  $\text{CDCl}_3$ ) spectrum of compound **3d**

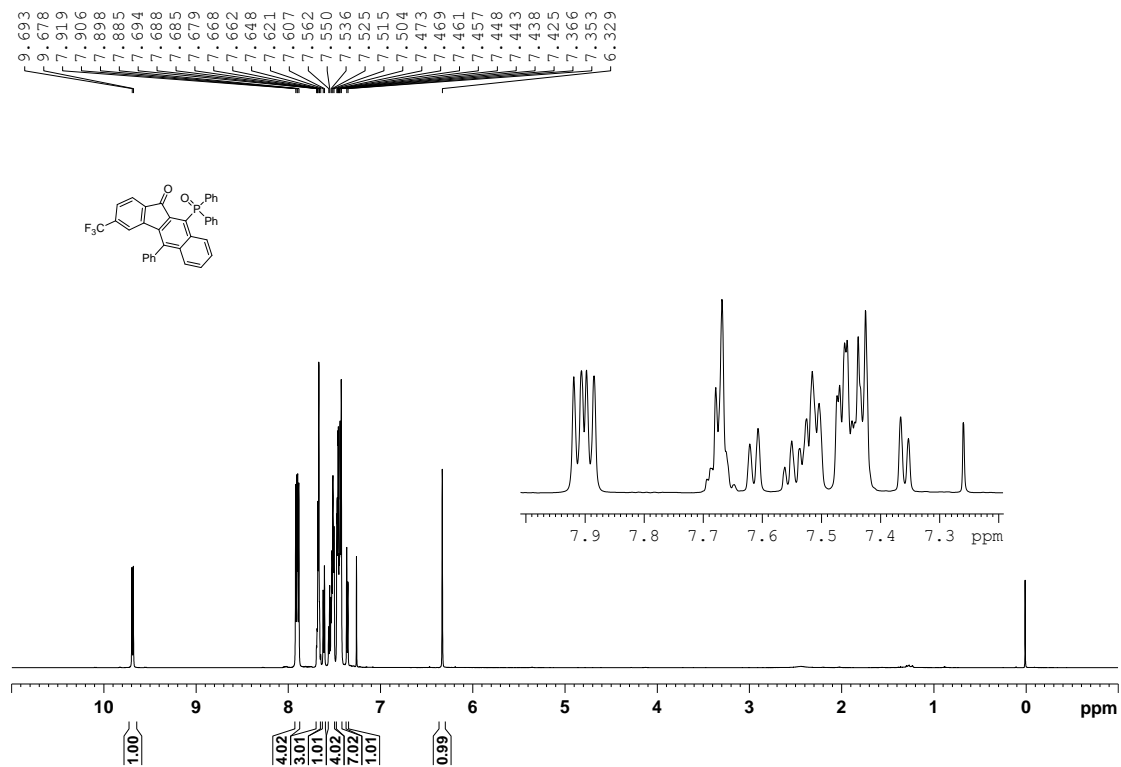

$^1\text{H}$  NMR (500 MHz,  $\text{CDCl}_3$ ) spectrum of compound **3e**

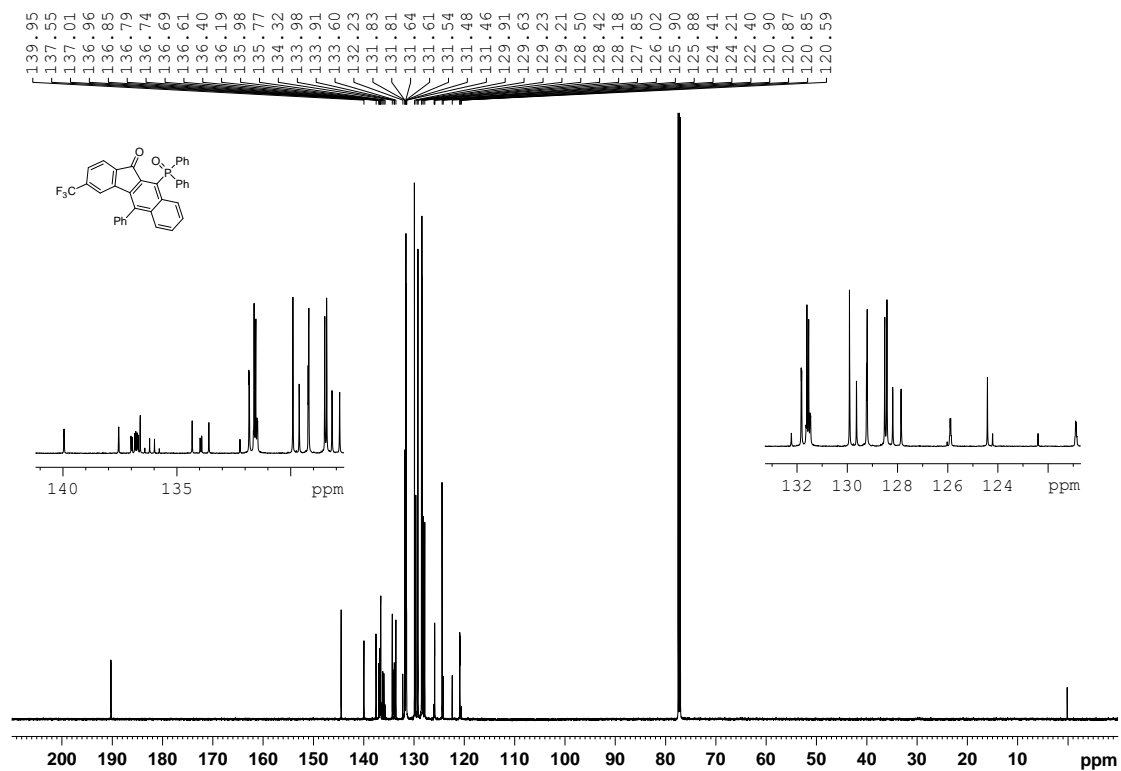

$^{13}\text{C}\{^1\text{H}\}$  NMR (125 MHz,  $\text{CDCl}_3$ ) spectrum of compound **3e**



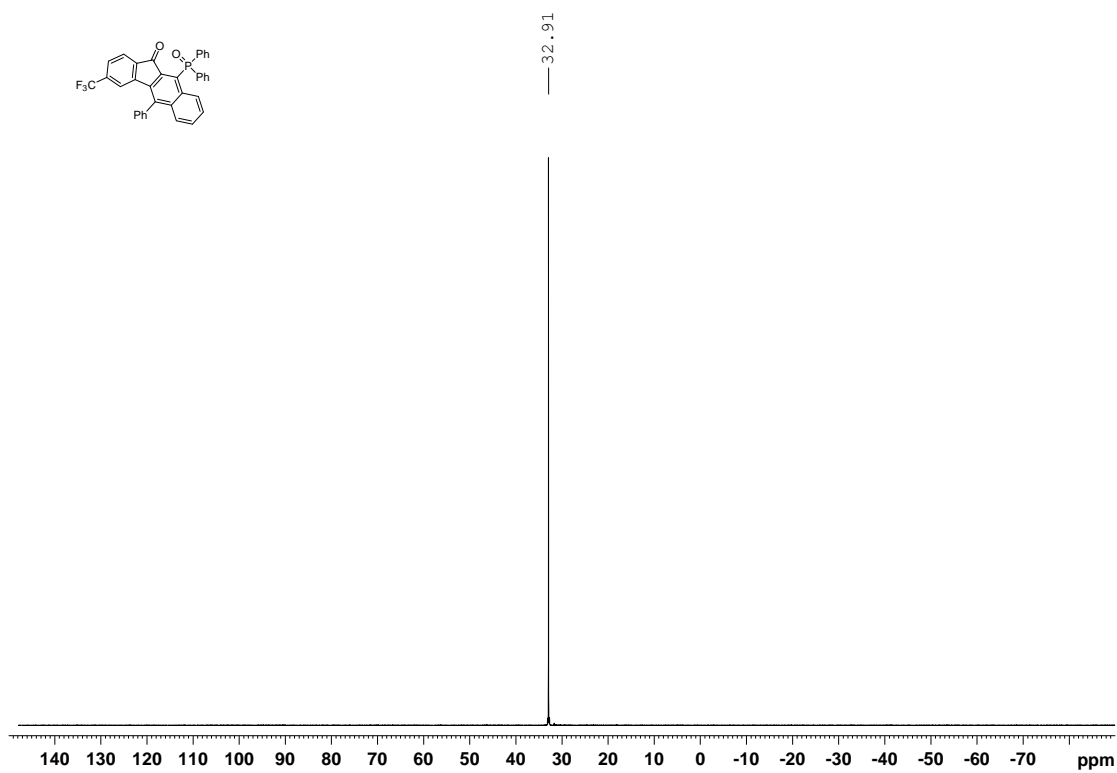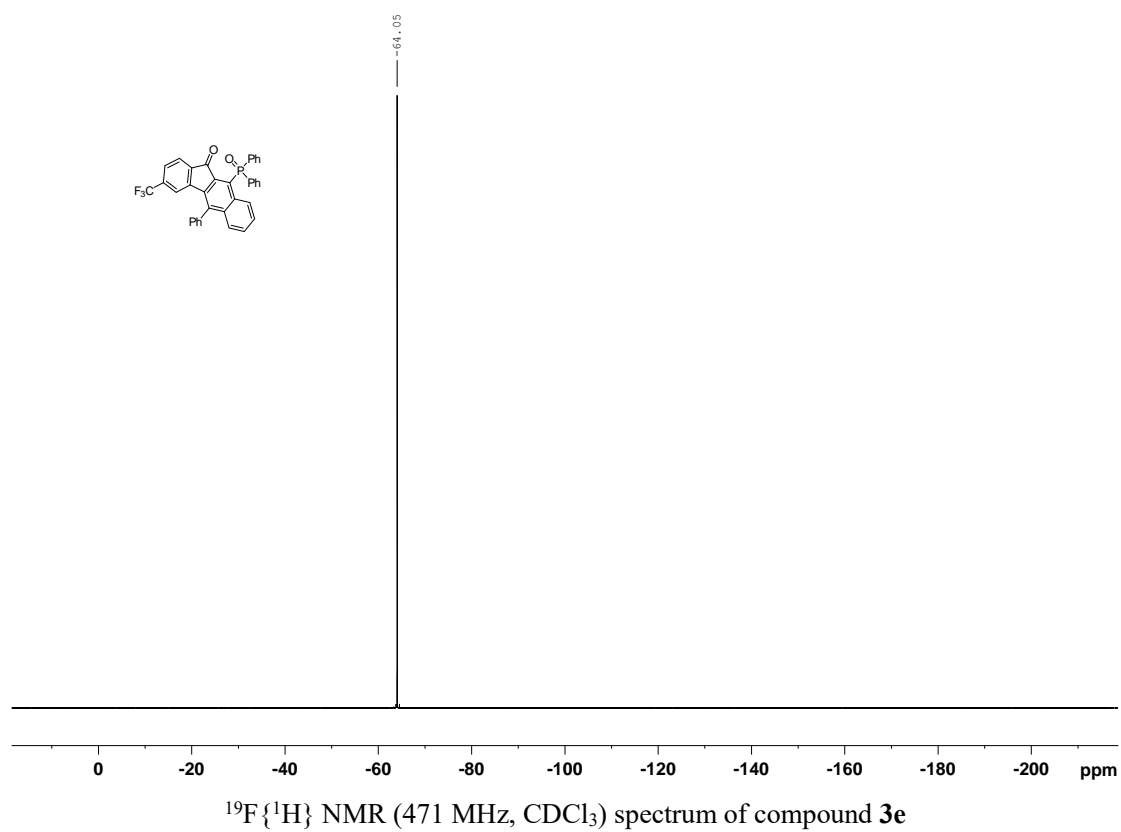

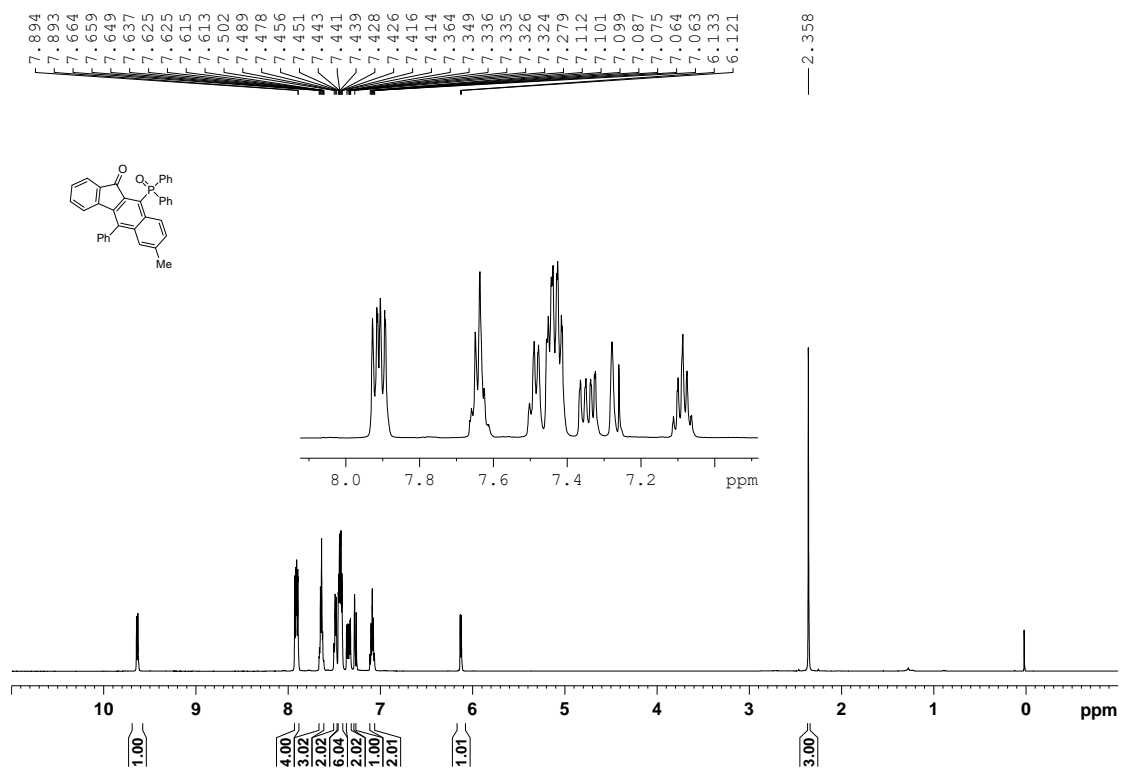

$^1\text{H NMR}$  (500 MHz,  $\text{CDCl}_3$ ) spectrum of compound **3f**

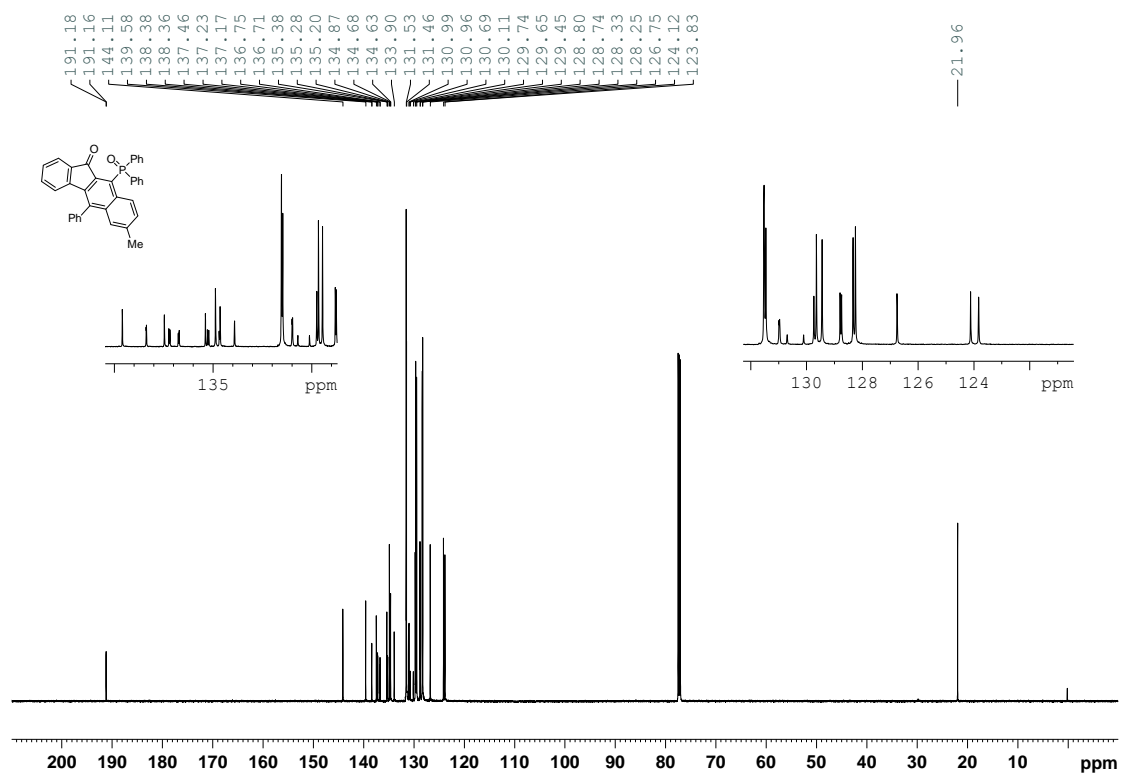

$^{13}\text{C}\{^1\text{H}\}$  NMR (125 MHz,  $\text{CDCl}_3$ ) spectrum of compound **3f**

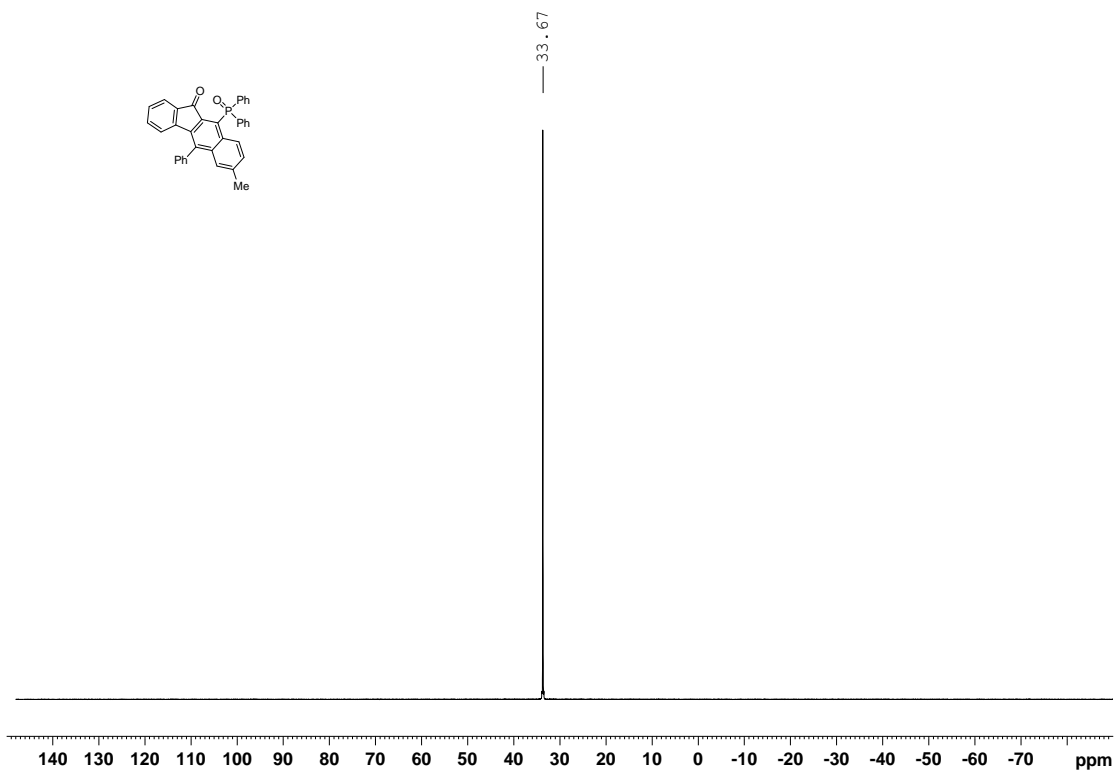

$^{31}\text{P}\{^1\text{H}\}$  NMR (202 MHz,  $\text{CDCl}_3$ ) spectrum of compound **3f**

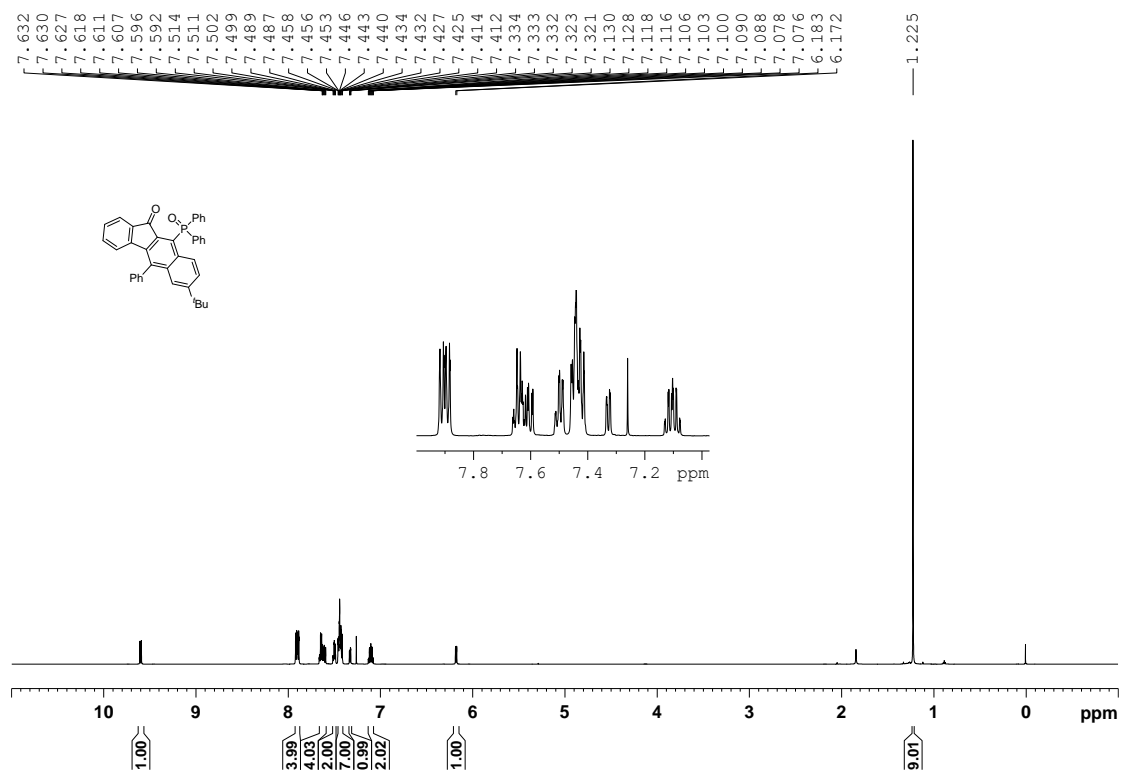

$^1\text{H}$  NMR (500 MHz,  $\text{CDCl}_3$ ) spectrum of compound **3g**

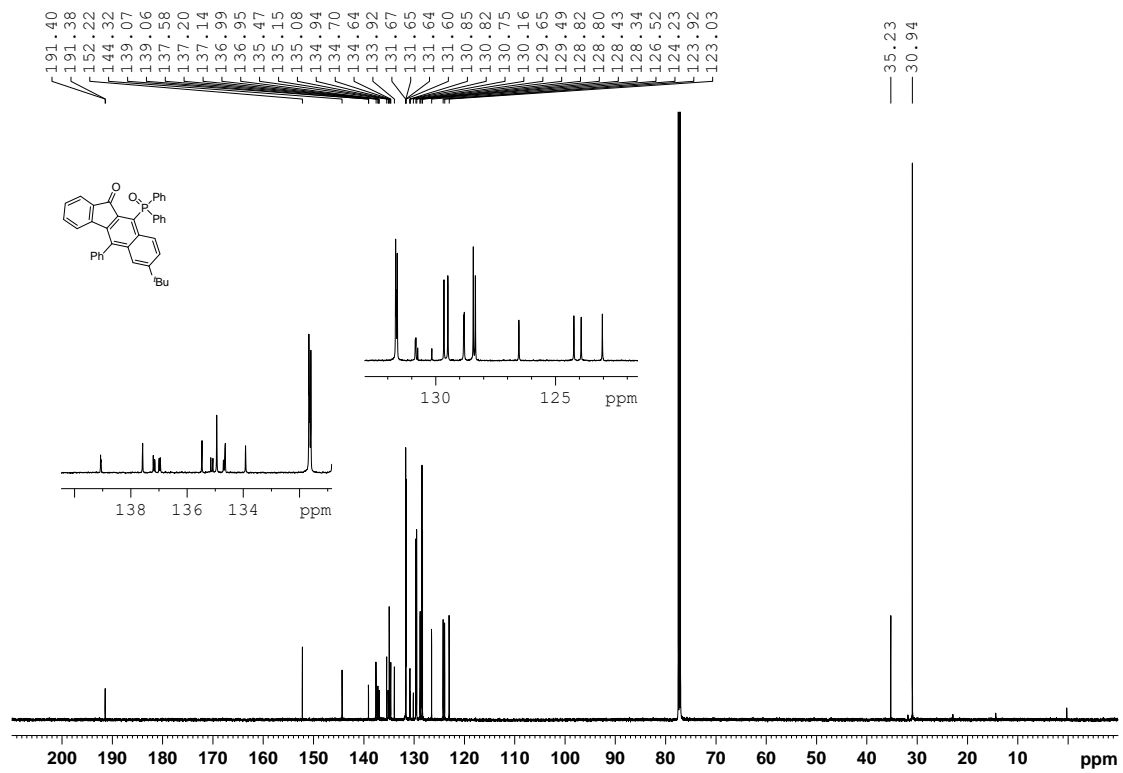

$^{13}\text{C}\{^1\text{H}\}$  NMR (125 MHz,  $\text{CDCl}_3$ ) spectrum of compound **3g**

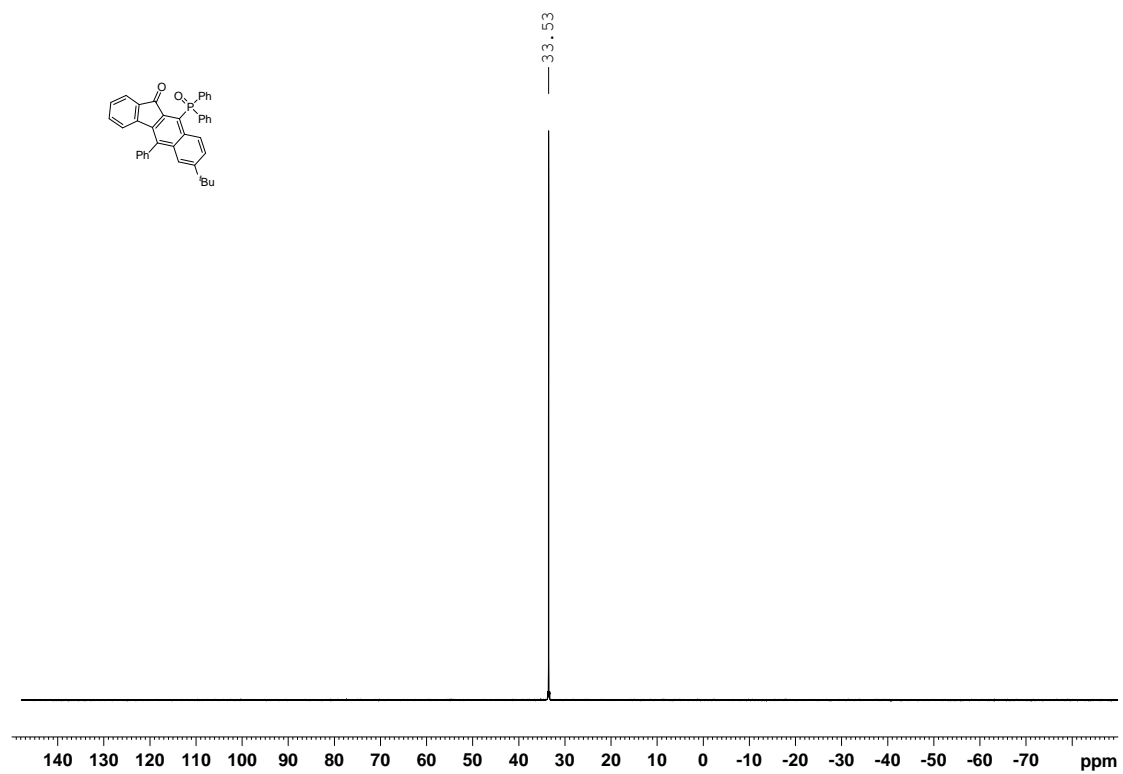

$^{31}\text{P}\{^1\text{H}\}$  NMR (202 MHz,  $\text{CDCl}_3$ ) spectrum of compound **3g**

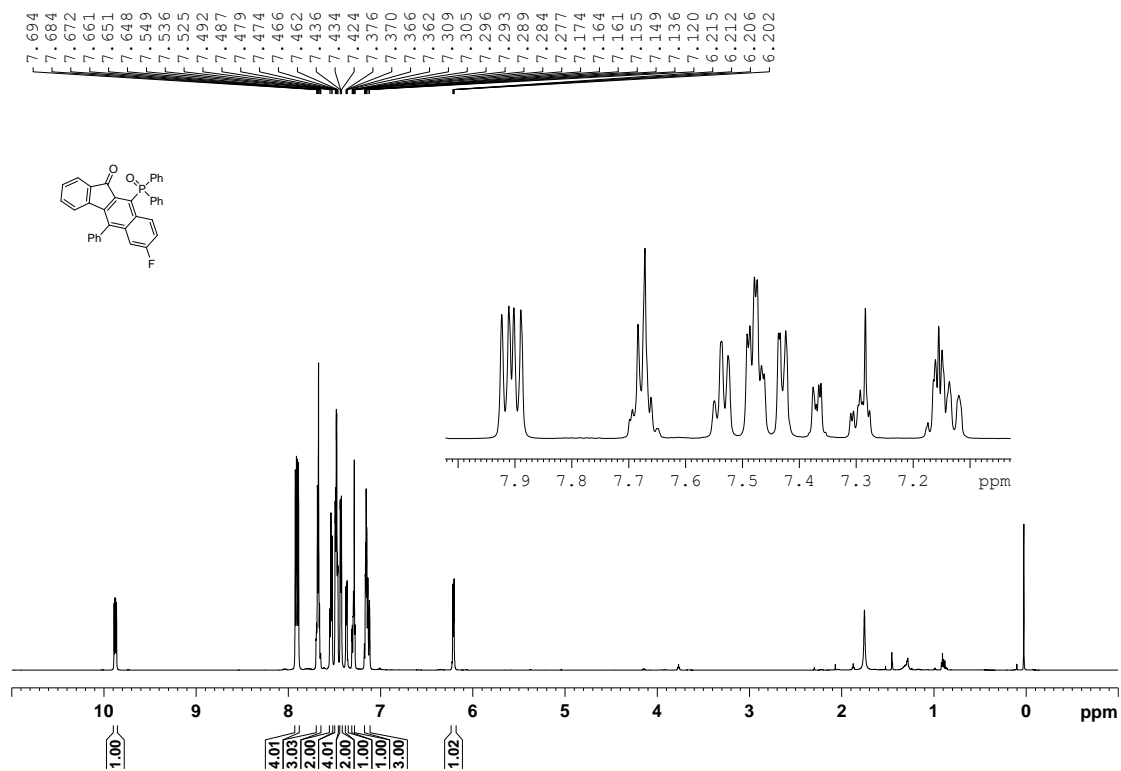

$^1\text{H NMR}$  (500 MHz,  $\text{CDCl}_3$ ) spectrum of compound **3h**

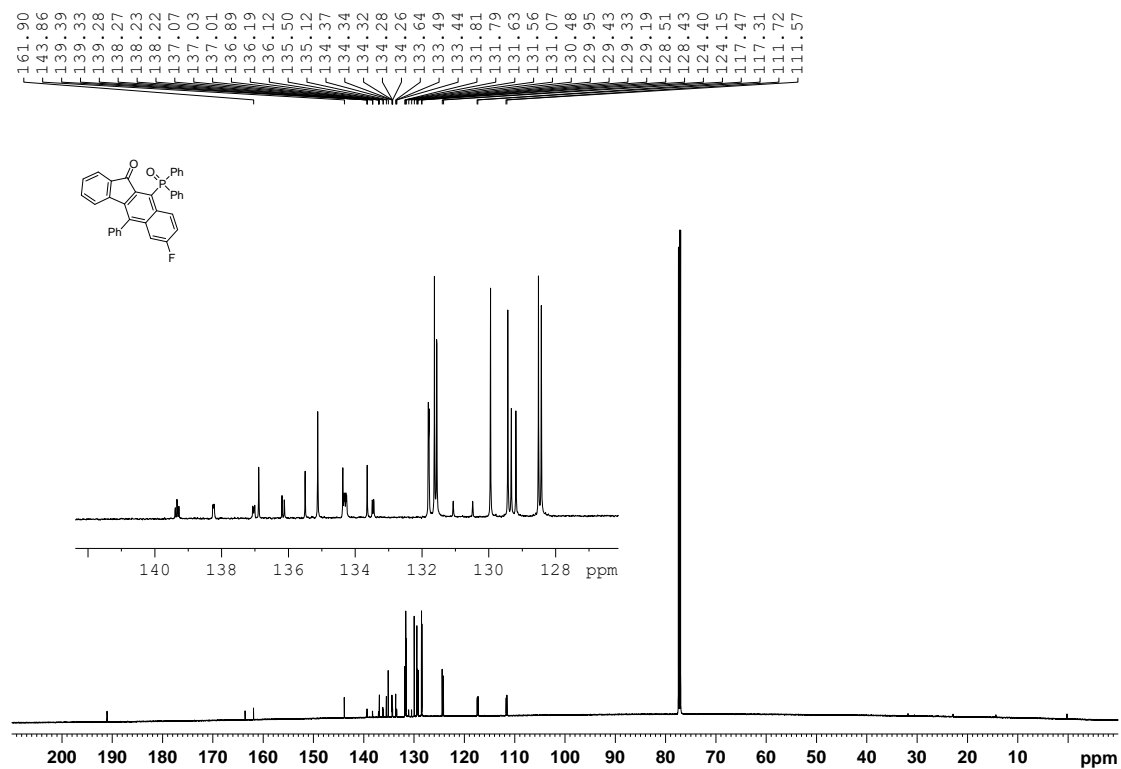

$^{13}\text{C}\{^1\text{H}\}$  NMR (125 MHz,  $\text{CDCl}_3$ ) spectrum of compound **3h**

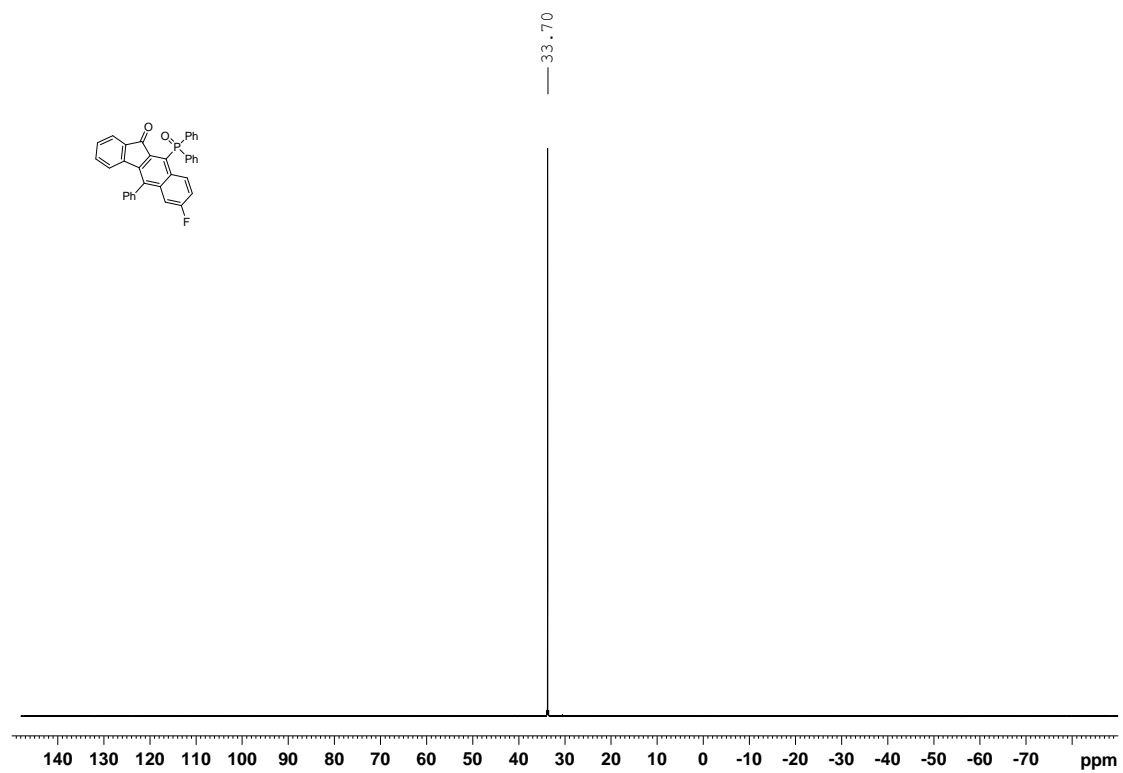

$^{31}\text{P}\{^1\text{H}\}$  NMR (202 MHz,  $\text{CDCl}_3$ ) spectrum of compound **3h**

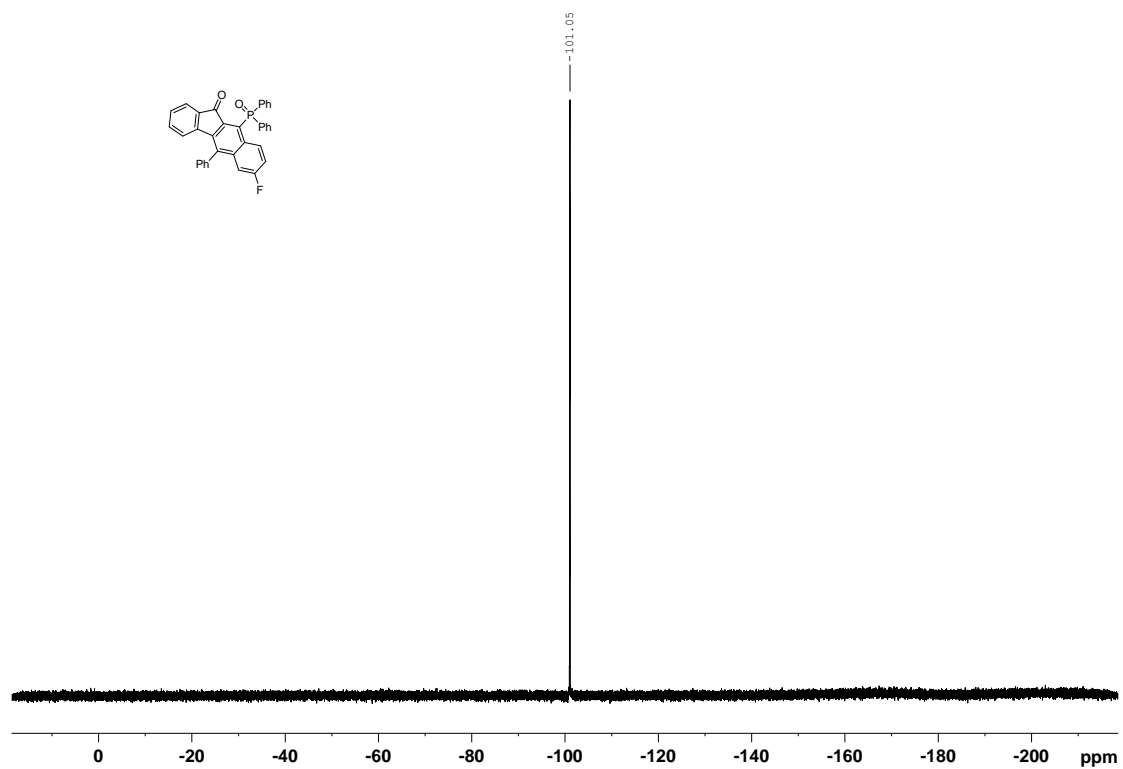

$^{19}\text{F}\{^1\text{H}\}$  NMR (471 MHz,  $\text{CDCl}_3$ ) spectrum of compound **3h**

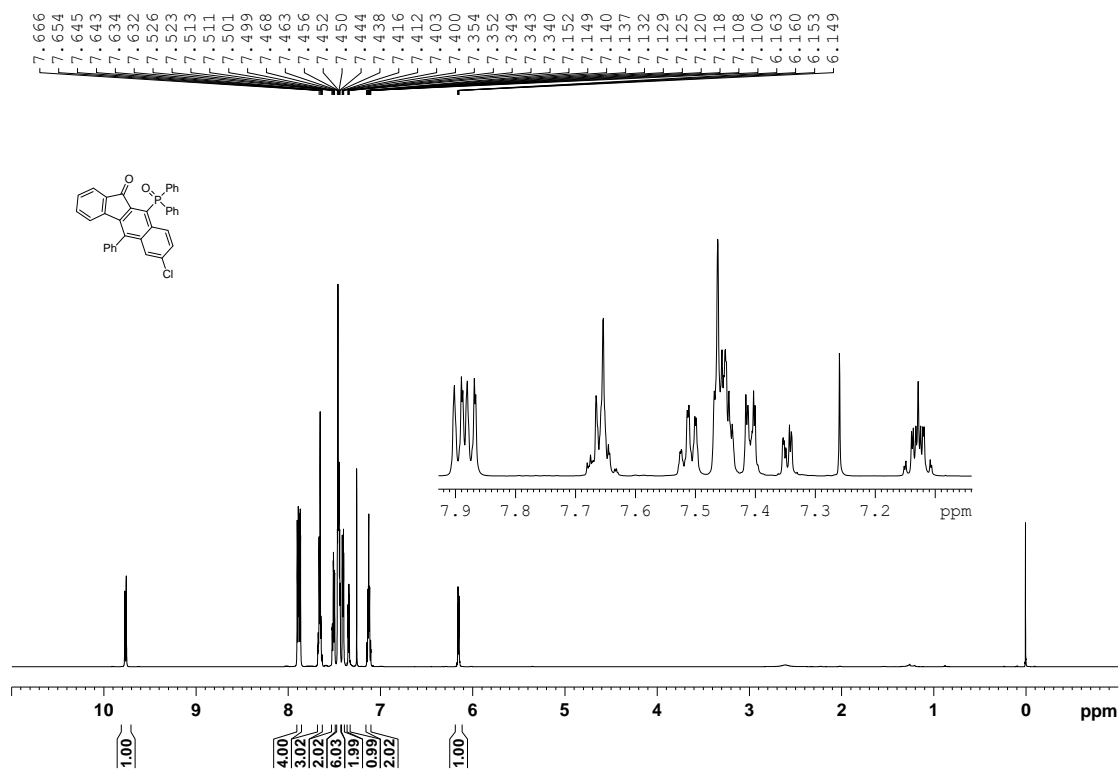

$^1\text{H}$  NMR (500 MHz,  $\text{CDCl}_3$ ) spectrum of compound **3i**

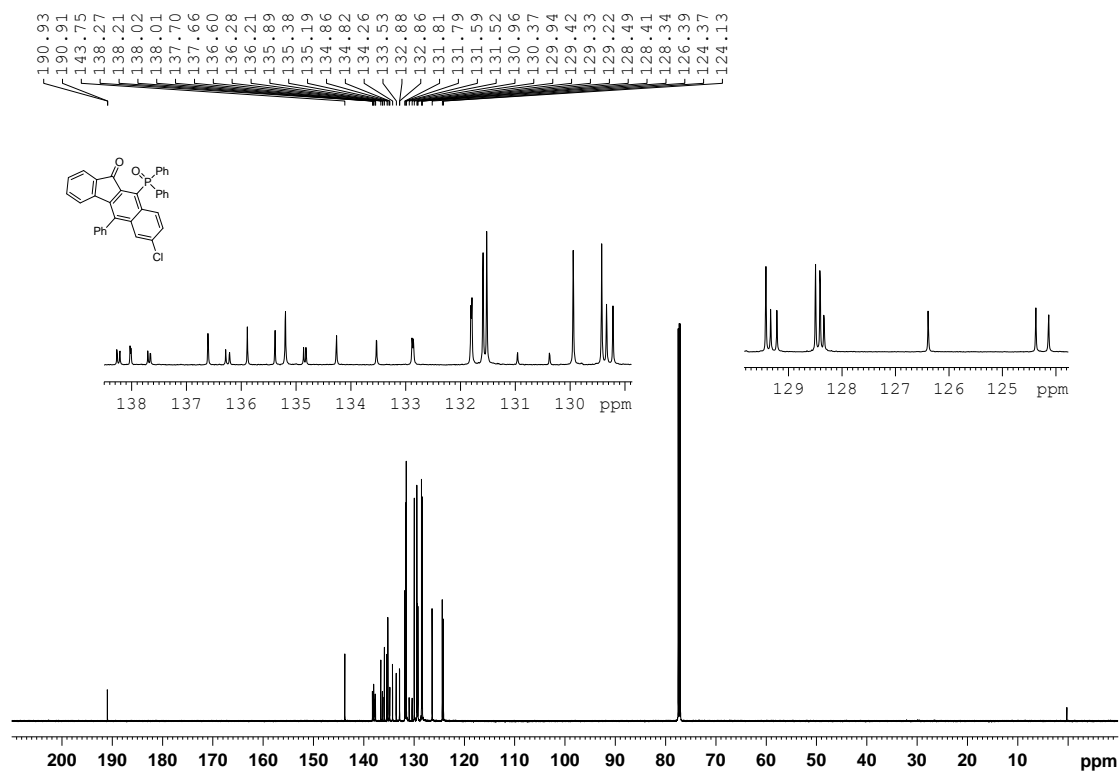

$^{13}\text{C}\{^1\text{H}\}$  NMR (125 MHz,  $\text{CDCl}_3$ ) spectrum of compound **3i**

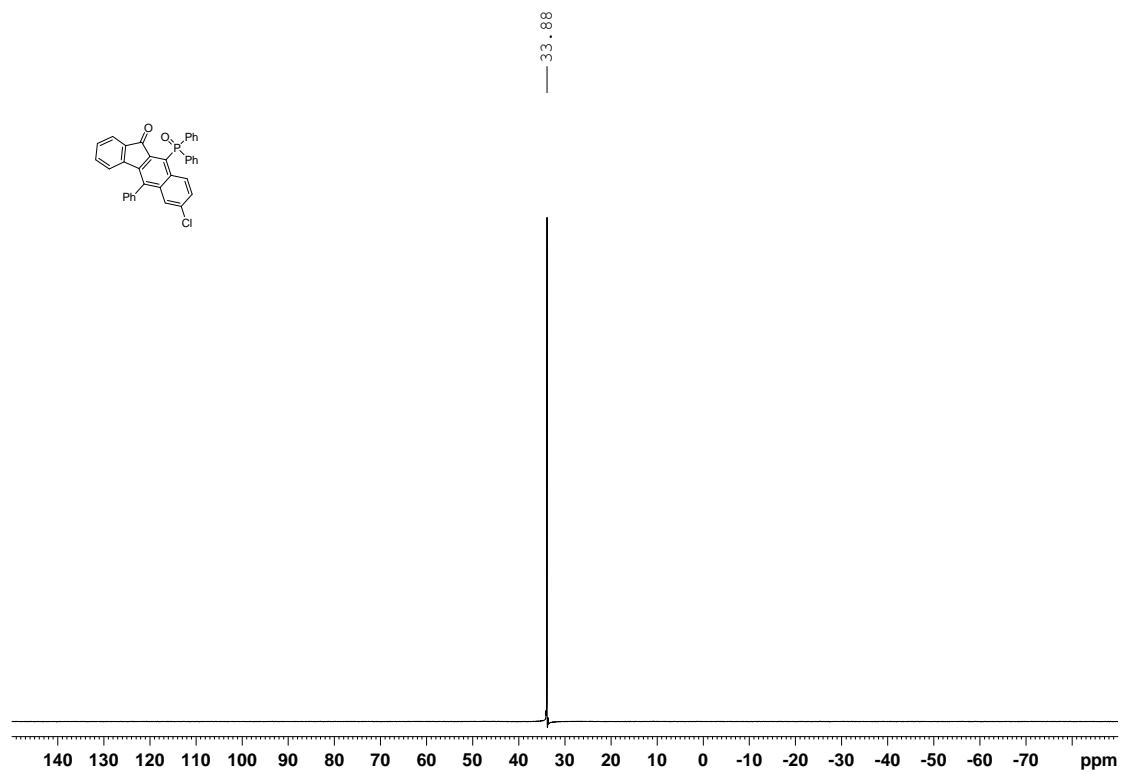

$^{31}\text{P}$  { $^1\text{H}$ } NMR (202 MHz,  $\text{CDCl}_3$ ) spectrum of compound **3i**

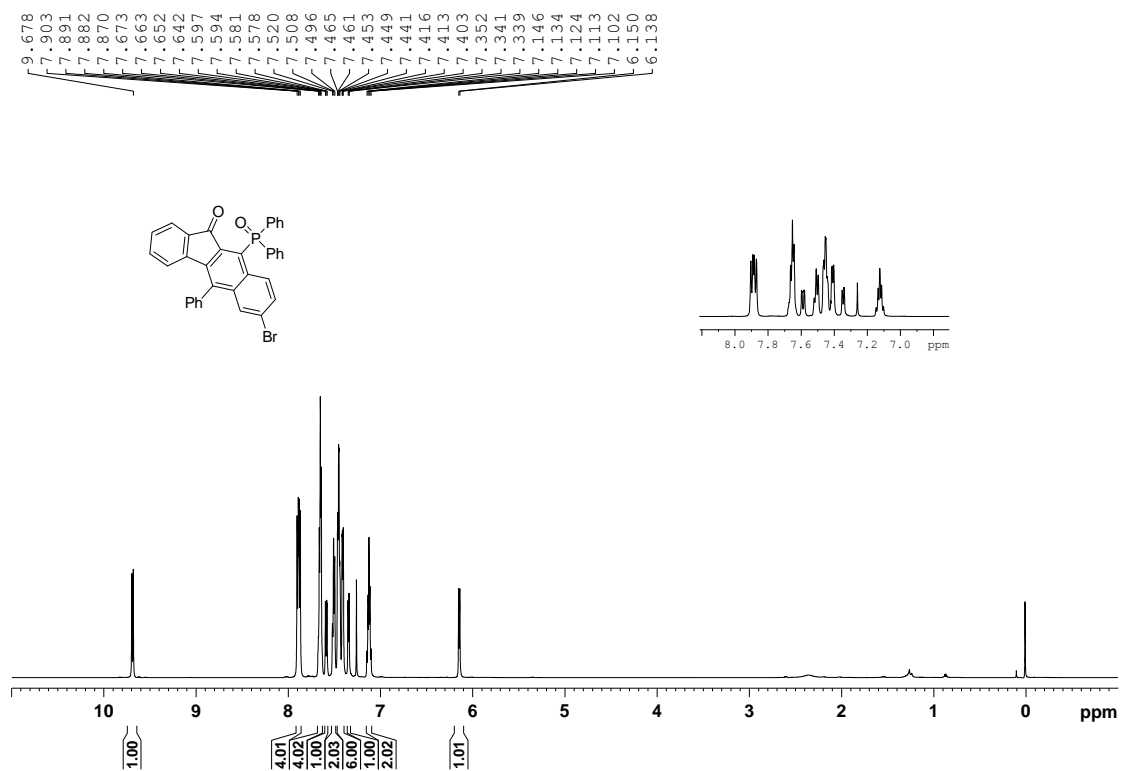

$^1\text{H}$  NMR (500 MHz,  $\text{CDCl}_3$ ) spectrum of compound **3j**



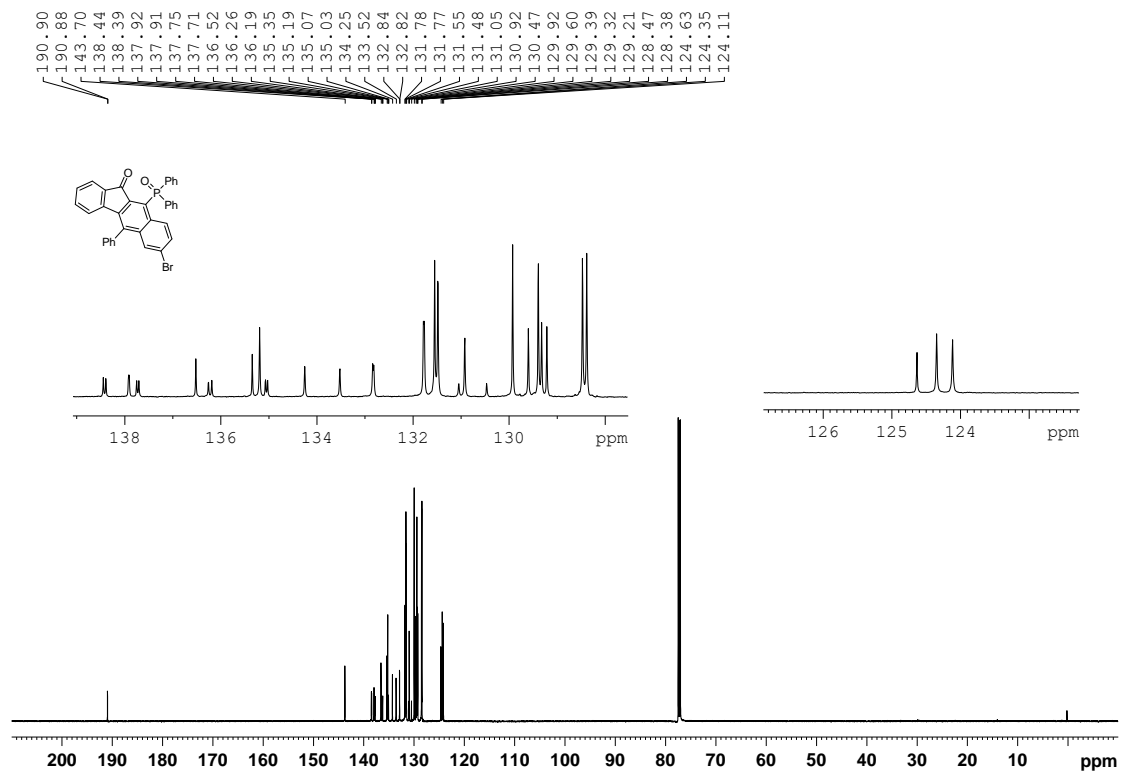

$^{13}\text{C}\{^1\text{H}\}$  NMR (125 MHz,  $\text{CDCl}_3$ ) spectrum of compound **3j**

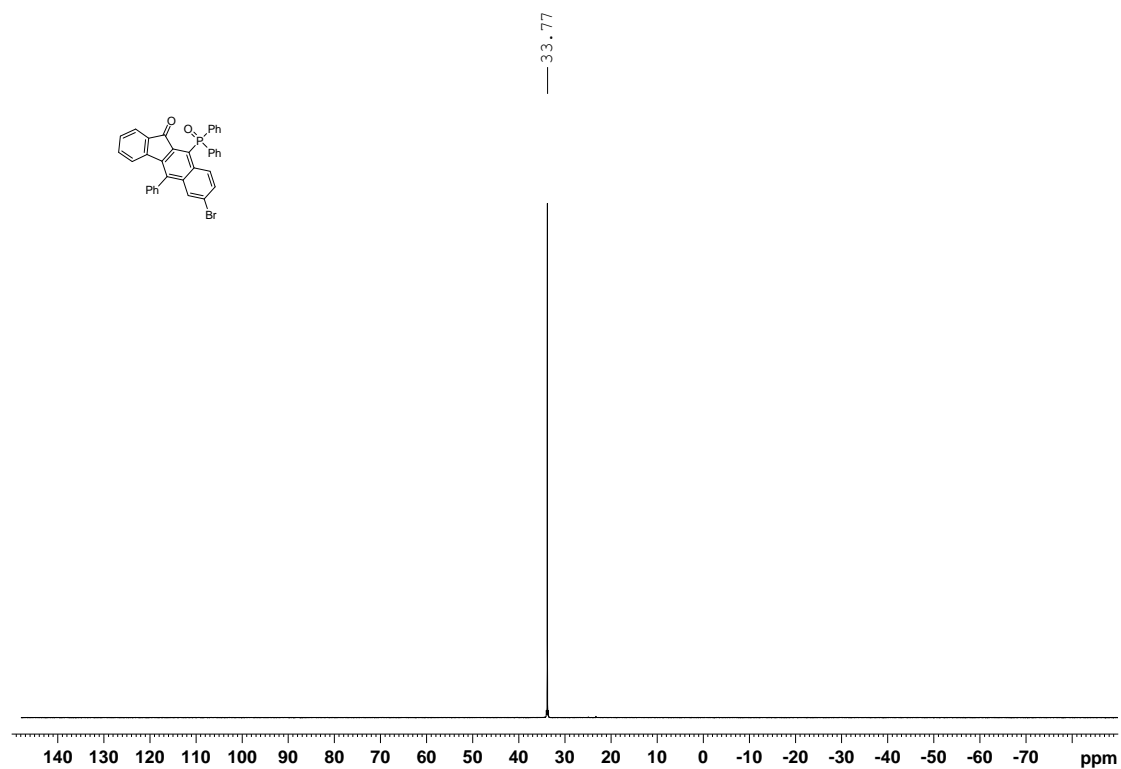

$^{31}\text{P}\{^1\text{H}\}$  NMR (202 MHz,  $\text{CDCl}_3$ ) spectrum of compound **3j**

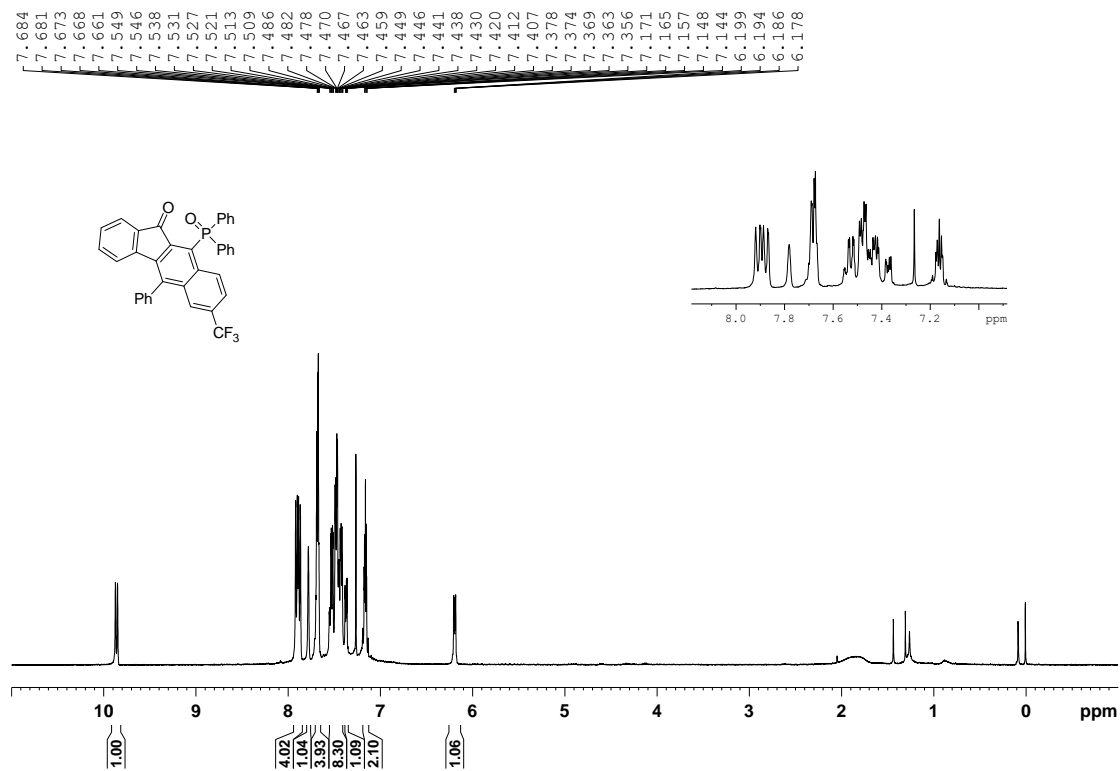

$^1\text{H}$  NMR (600 MHz,  $\text{CDCl}_3$ ) spectrum of compound **3k**

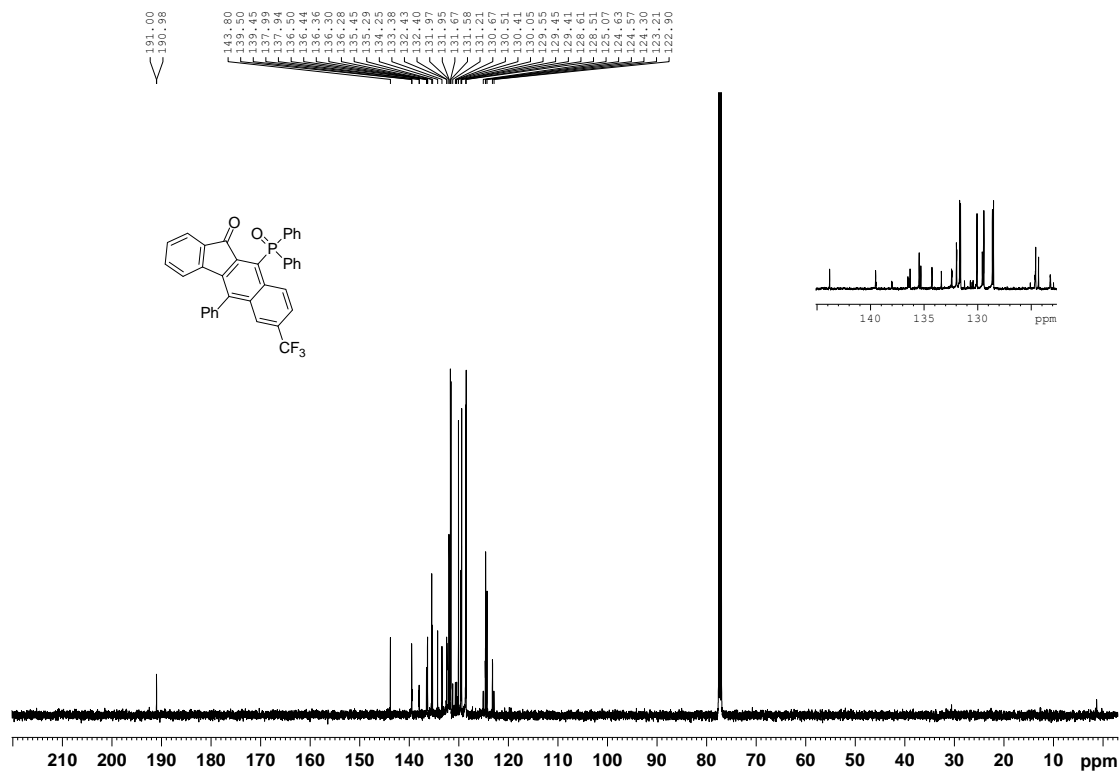

$^{13}\text{C}\{^1\text{H}\}$  NMR (125 MHz,  $\text{CDCl}_3$ ) spectrum of compound **3k**

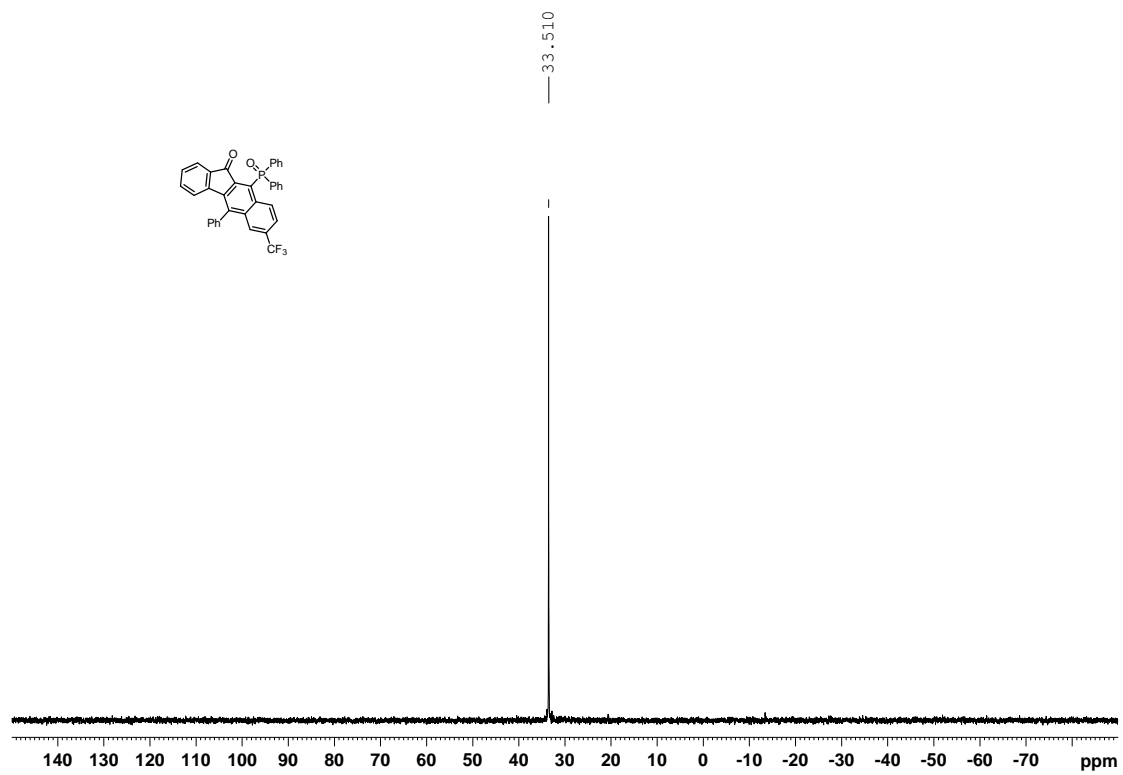

$^{31}\text{P}\{^1\text{H}\}$  NMR (202 MHz,  $\text{CDCl}_3$ ) spectrum of compound **3k**

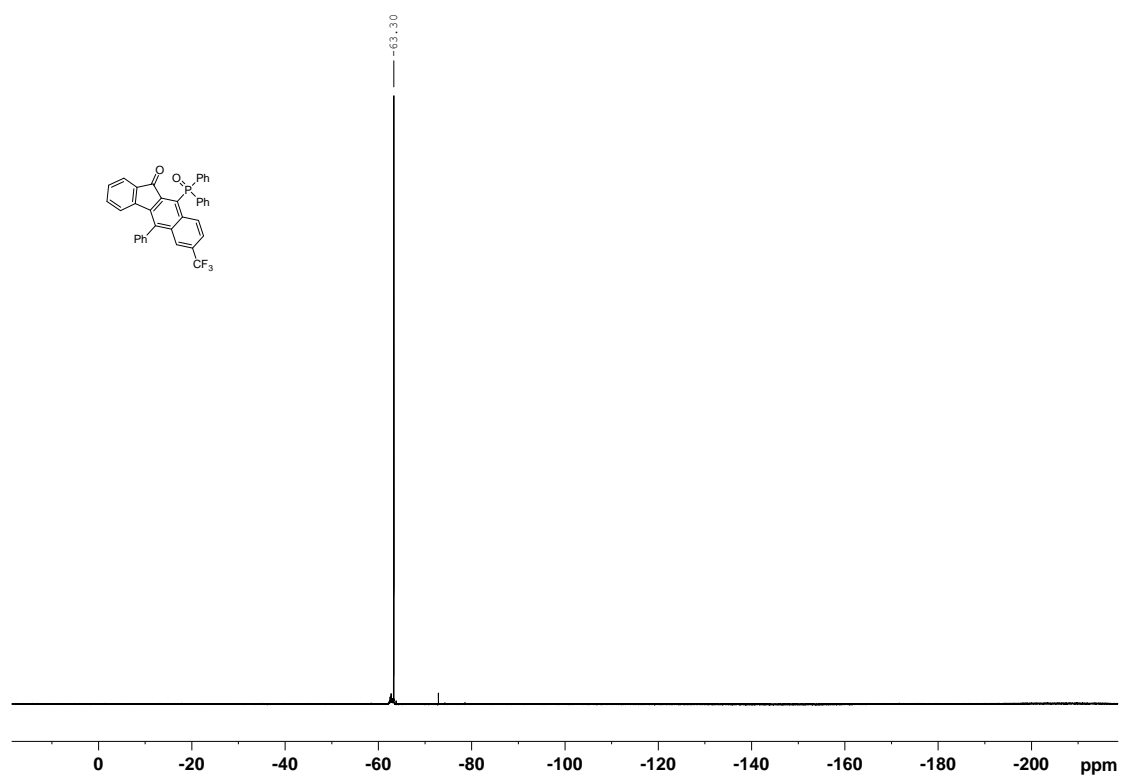

$^{19}\text{F}\{^1\text{H}\}$  NMR (471 MHz,  $\text{CDCl}_3$ ) spectrum of compound **3k**

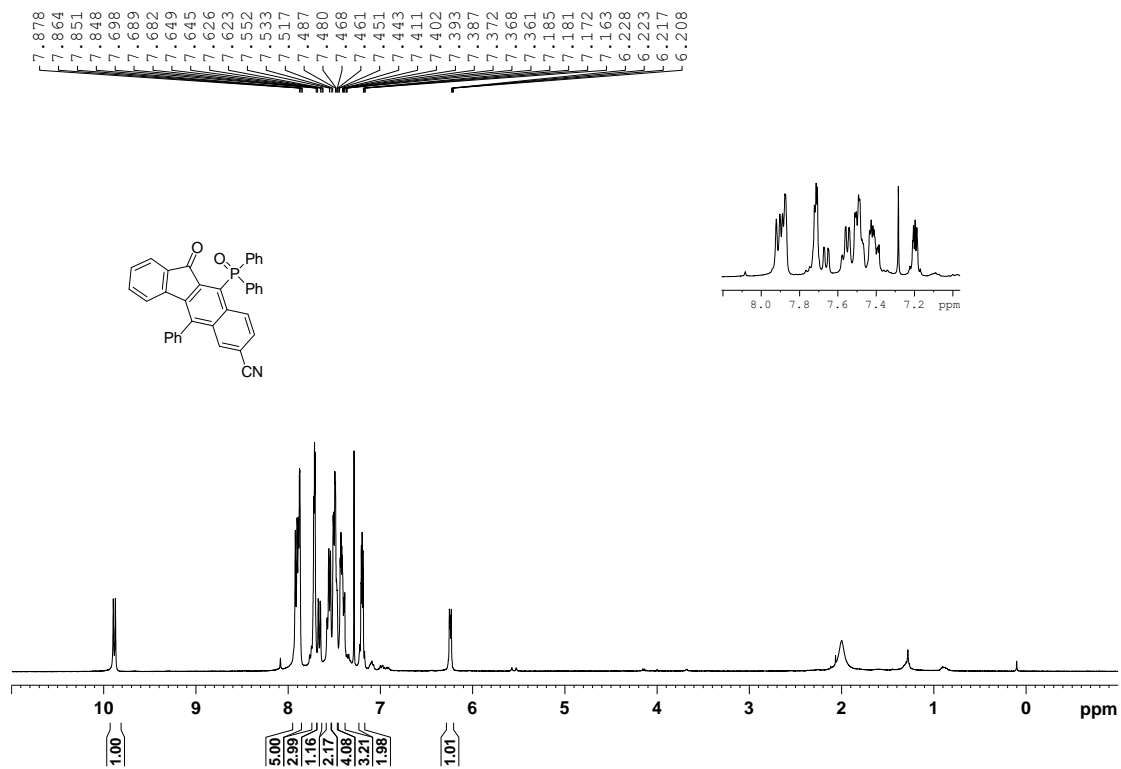

$^1\text{H}$  NMR (500 MHz,  $\text{CDCl}_3$ ) spectrum of compound **31**

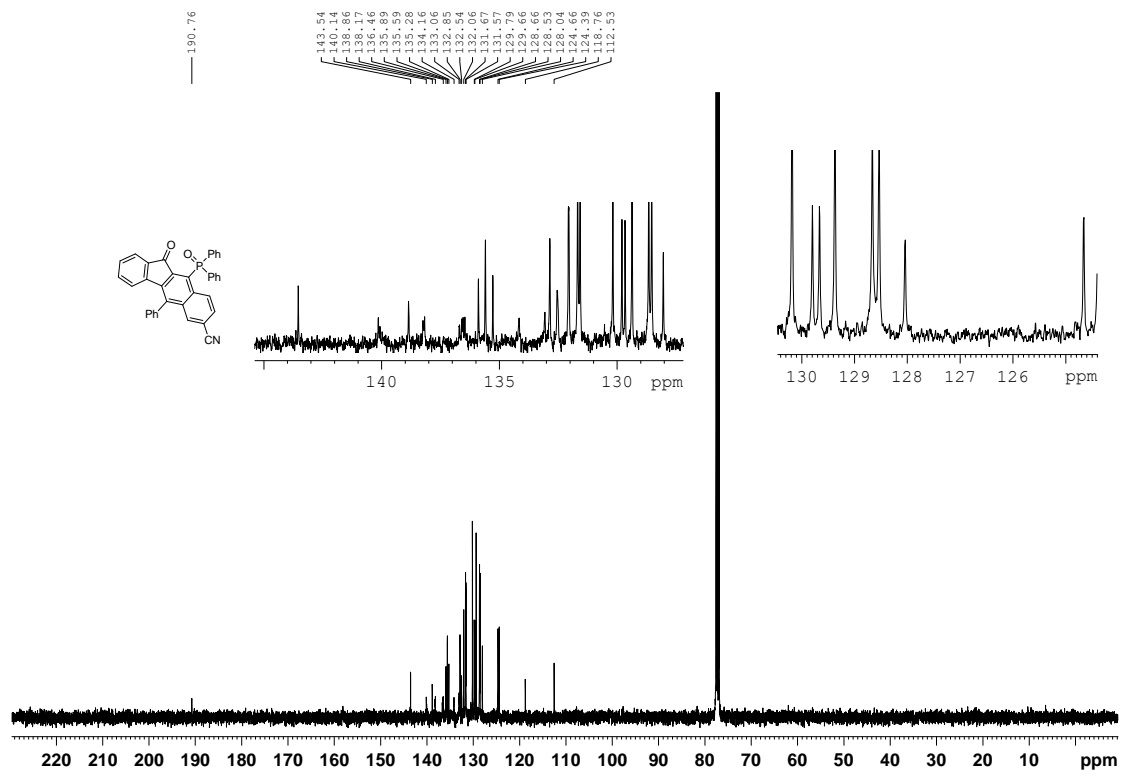

$^{13}\text{C}\{^1\text{H}\}$  NMR (125 MHz,  $\text{CDCl}_3$ ) spectrum of compound **31**

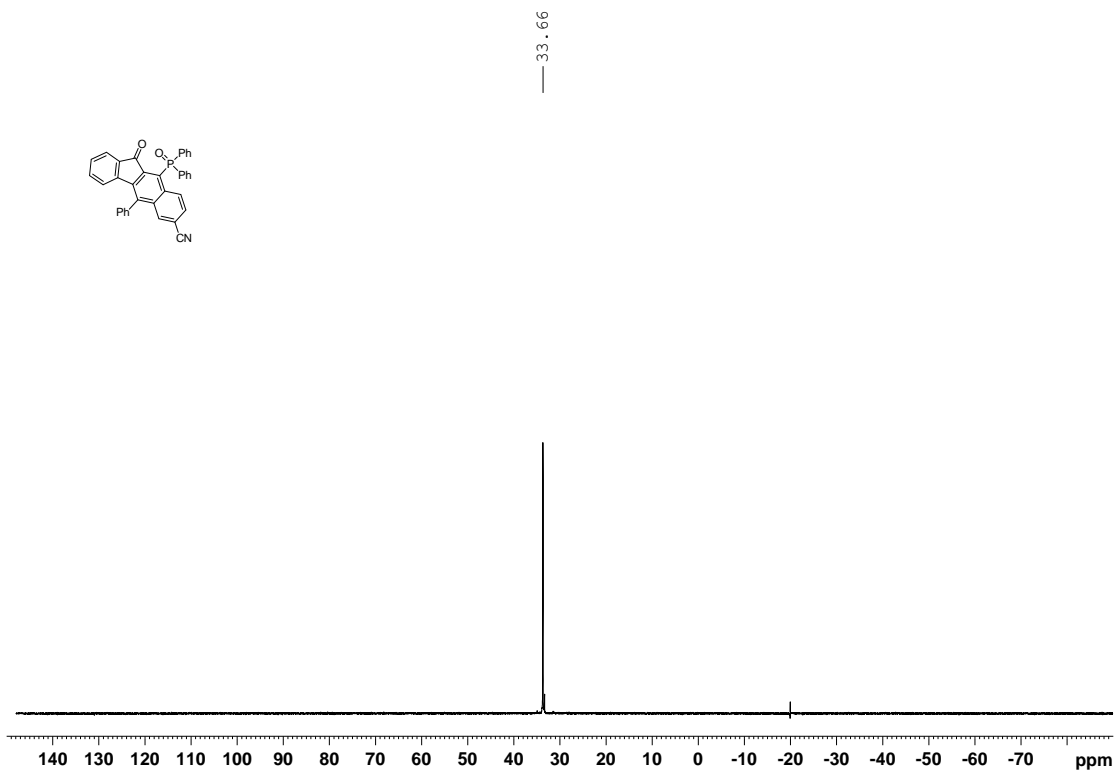

$^{31}\text{P}\{^1\text{H}\}$  NMR (202 MHz,  $\text{CDCl}_3$ ) spectrum of compound **3l**

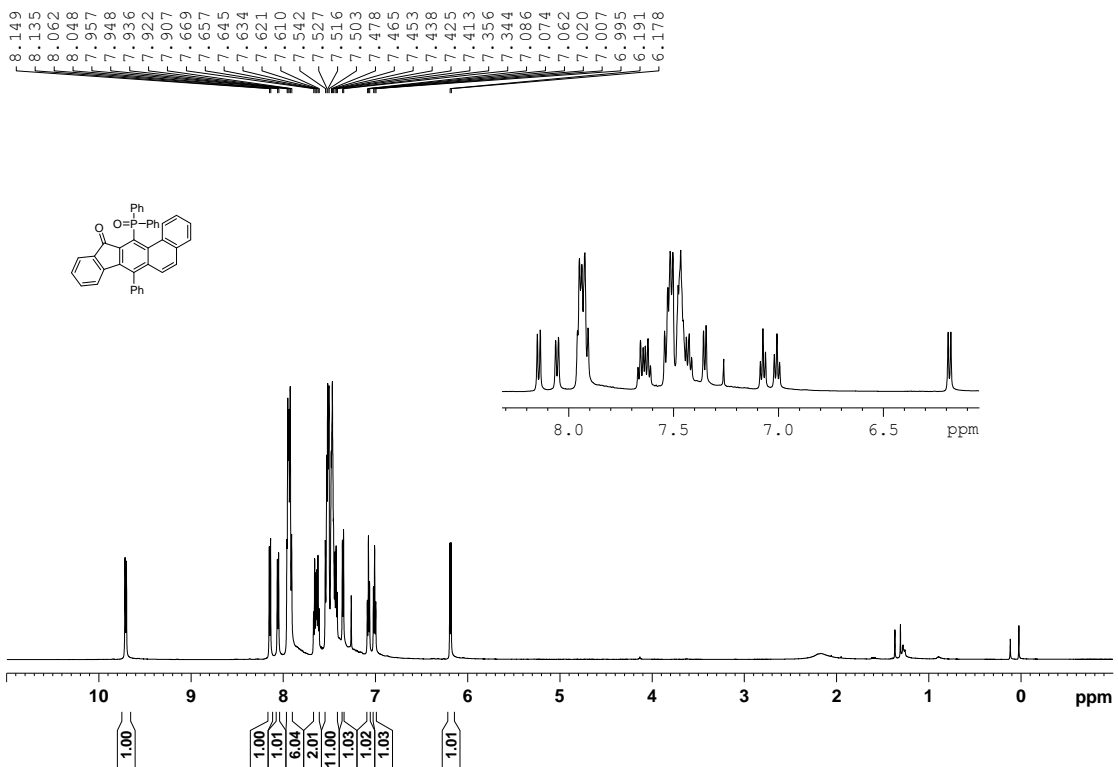

$^1\text{H}$  NMR (500 MHz,  $\text{CDCl}_3$ ) spectrum of compound **3n**

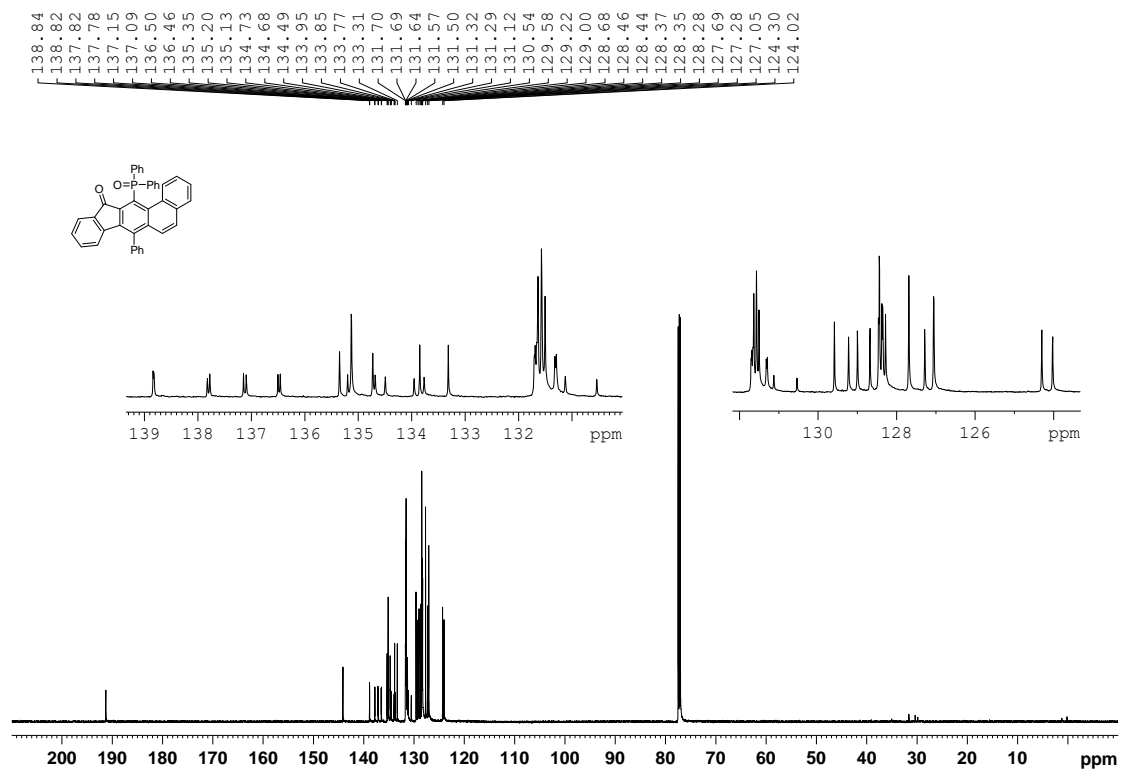

$^{13}\text{C}\{^1\text{H}\}$  NMR (125 MHz,  $\text{CDCl}_3$ ) spectrum of compound **3n**

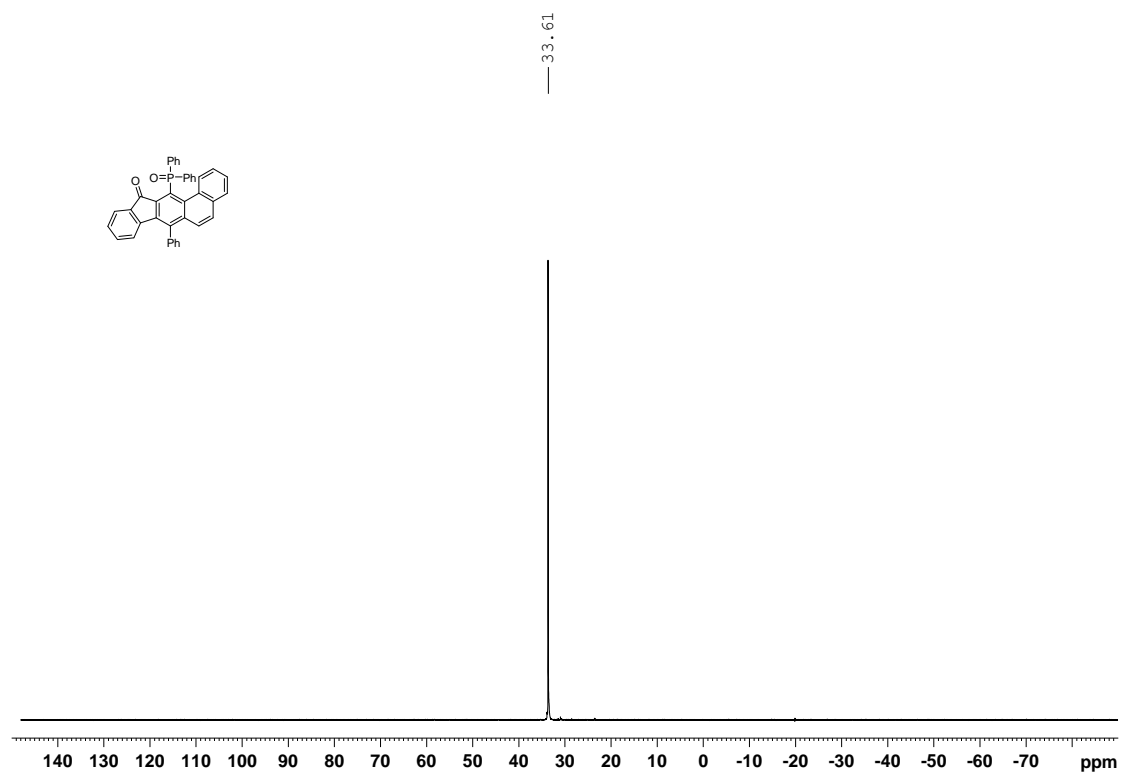

$^{31}\text{P}\{^1\text{H}\}$  NMR (202 MHz,  $\text{CDCl}_3$ ) spectrum of compound **3n**

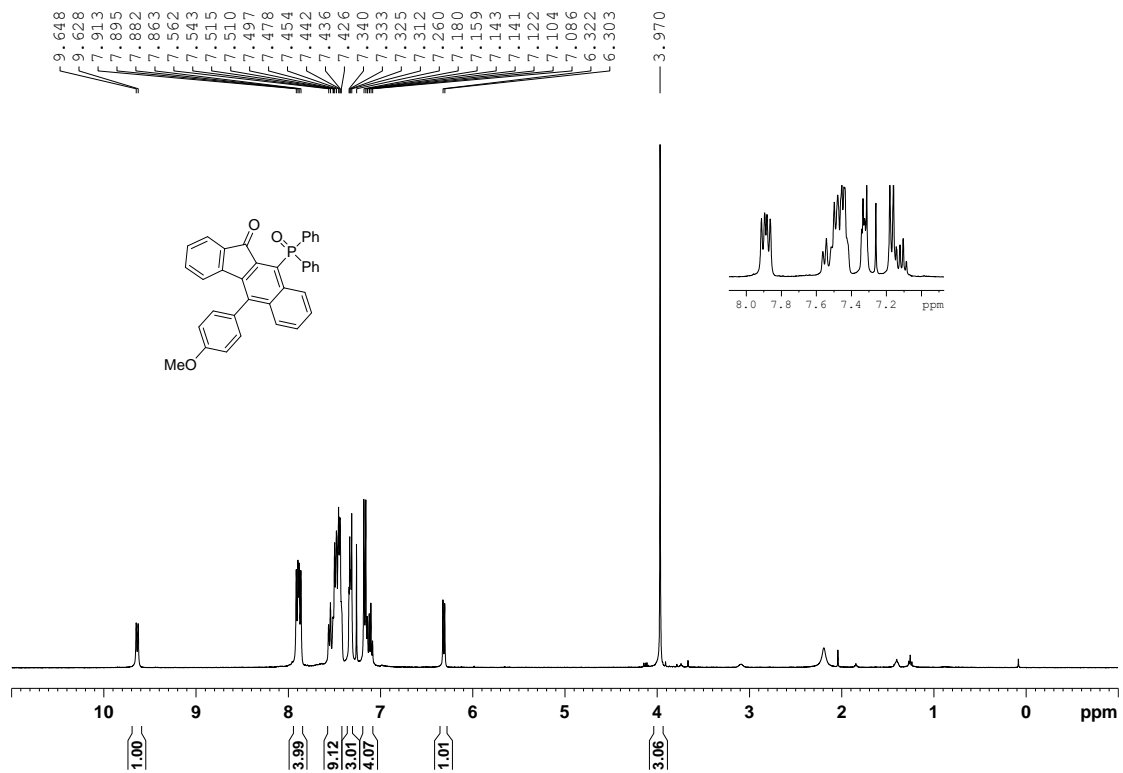

$^1\text{H NMR}$  (500 MHz,  $\text{CDCl}_3$ ) spectrum of compound **30**

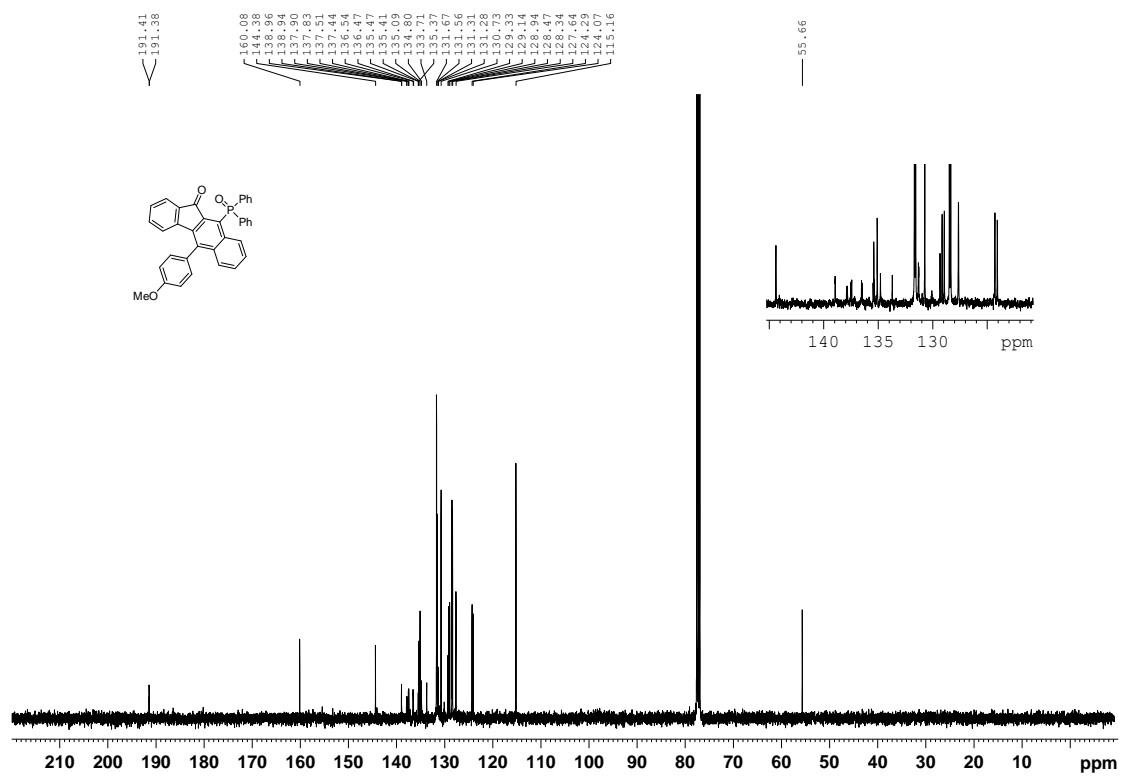

$^{13}\text{C}\{^1\text{H}\}$  NMR (125 MHz,  $\text{CDCl}_3$ ) spectrum of compound **30**

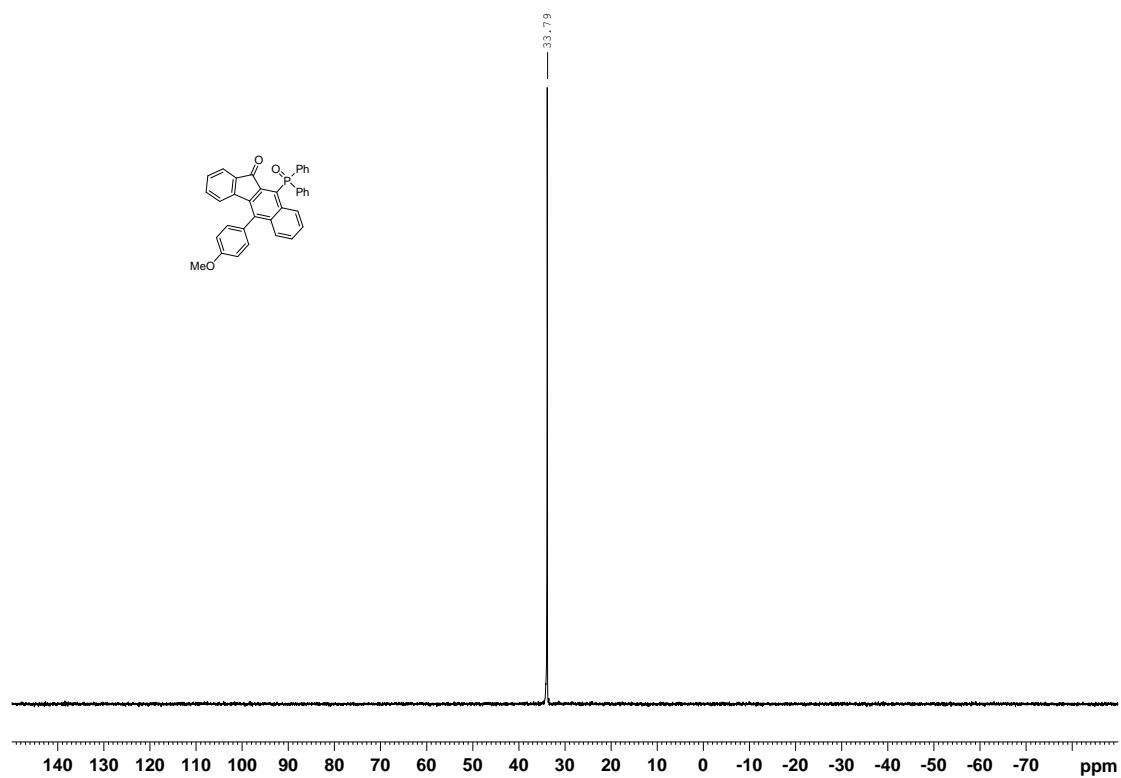

$^{31}\text{P}\{^1\text{H}\}$  NMR (202 MHz,  $\text{CDCl}_3$ ) spectrum of compound **3o**

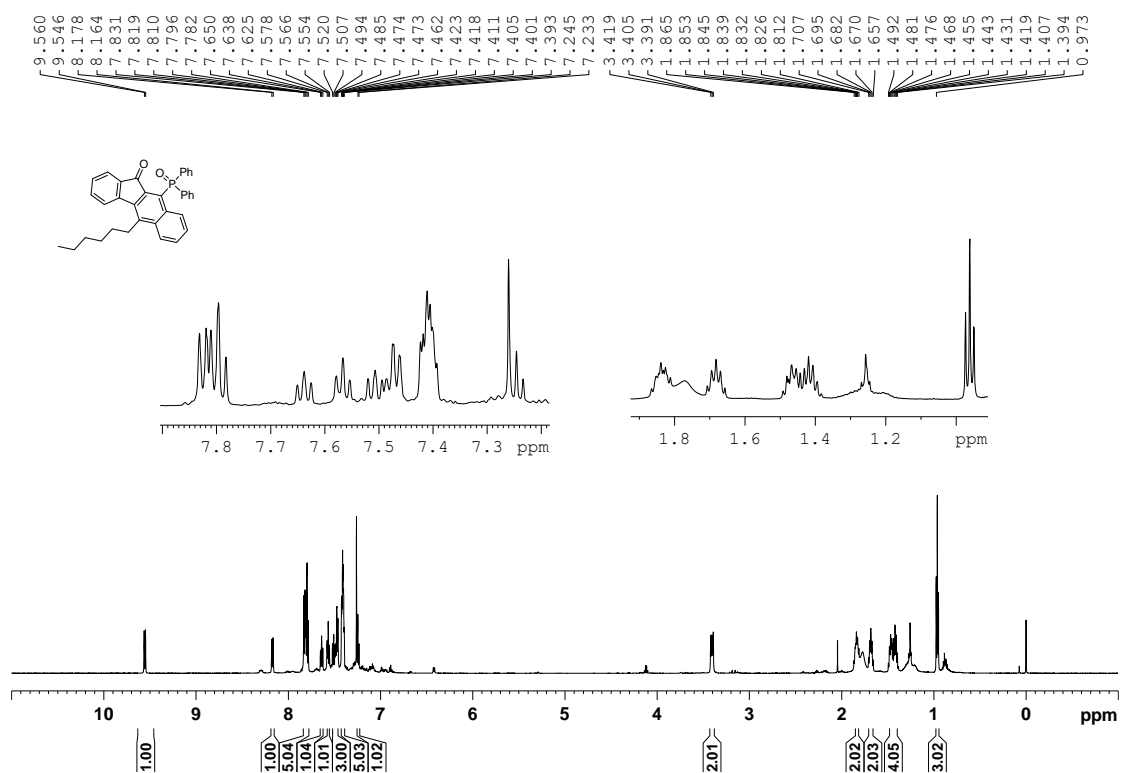

$^1\text{H}$  NMR (500 MHz,  $\text{CDCl}_3$ ) spectrum of compound **3p**



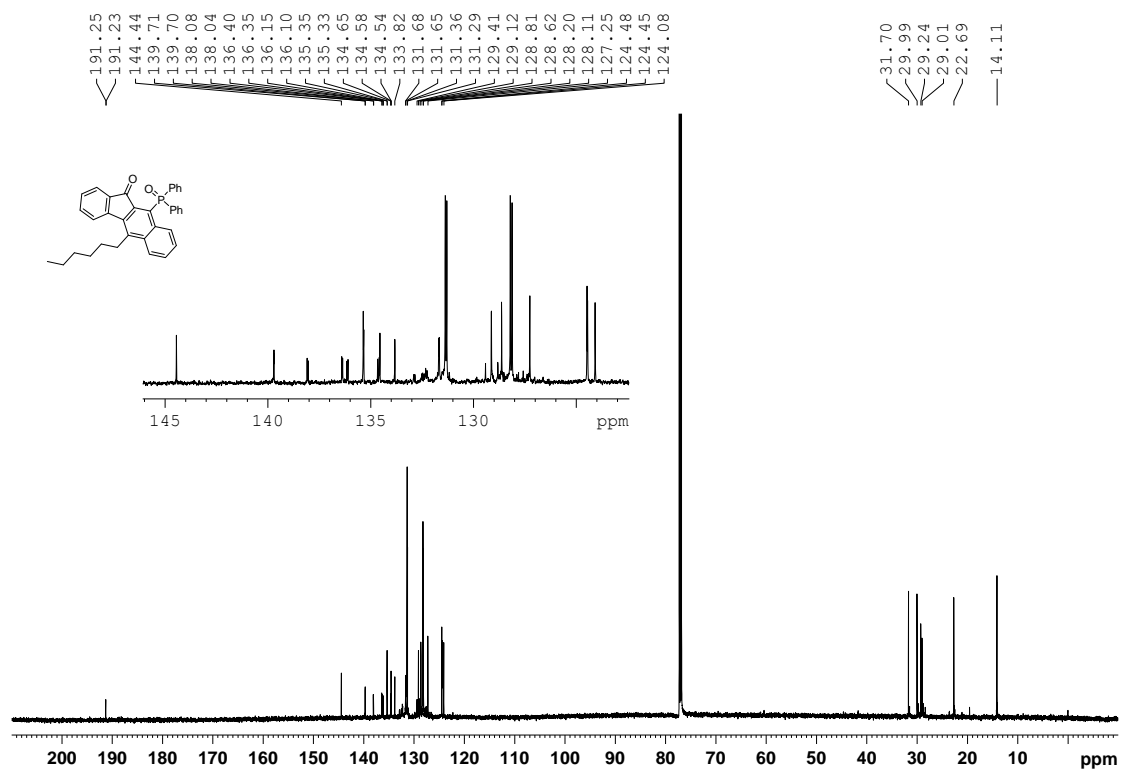

$^{13}\text{C}\{^1\text{H}\}$  NMR (125 MHz,  $\text{CDCl}_3$ ) spectrum of compound **3p**

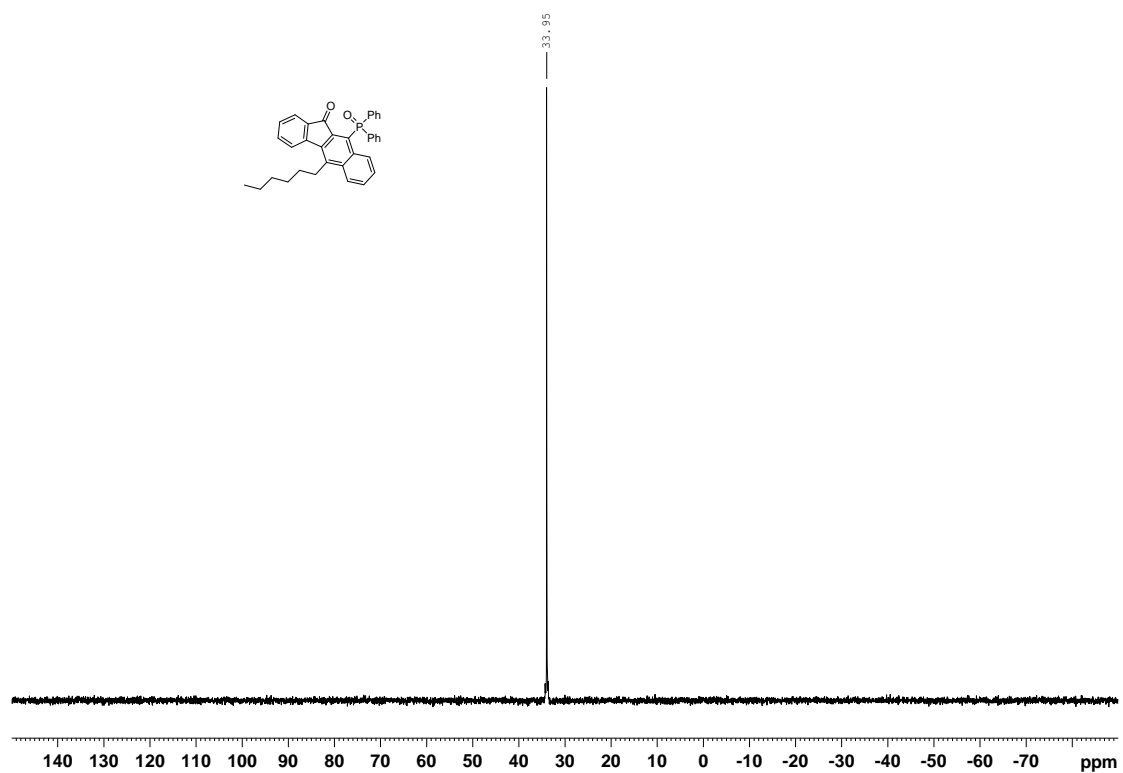

$^{31}\text{P}\{^1\text{H}\}$  NMR (202 MHz,  $\text{CDCl}_3$ ) spectrum of compound **3p**

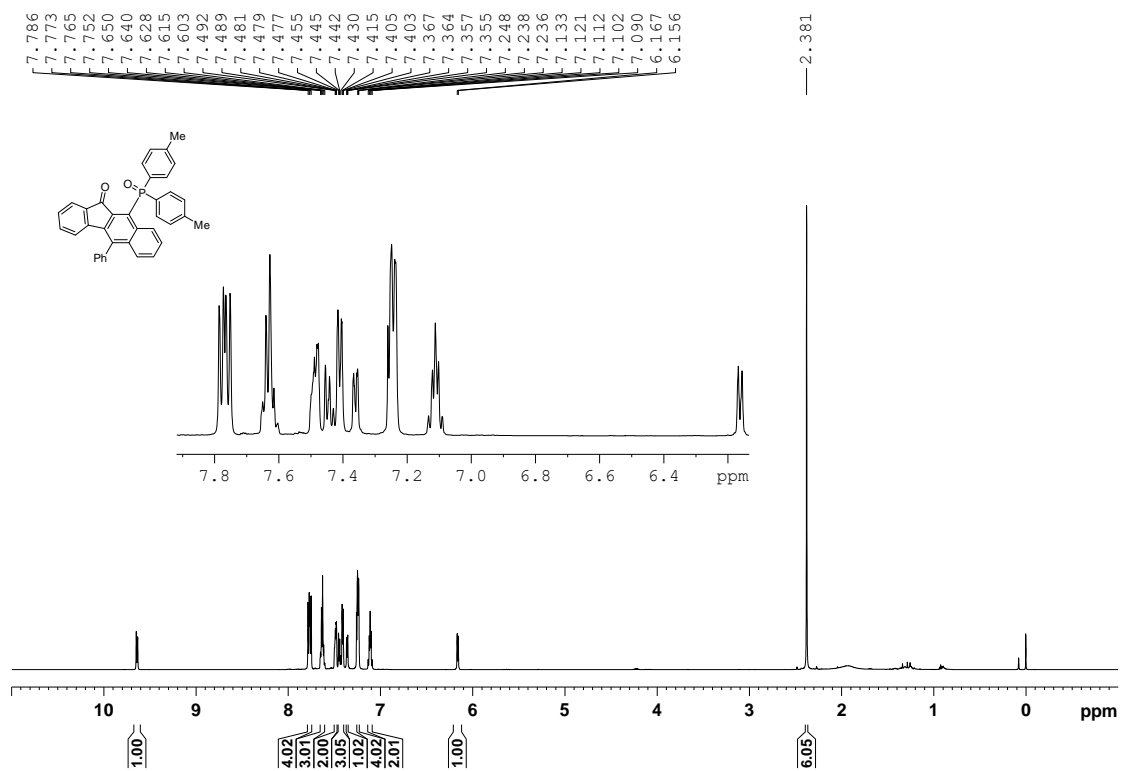

$^1\text{H}$  NMR (500 MHz,  $\text{CDCl}_3$ ) spectrum of compound **3q**

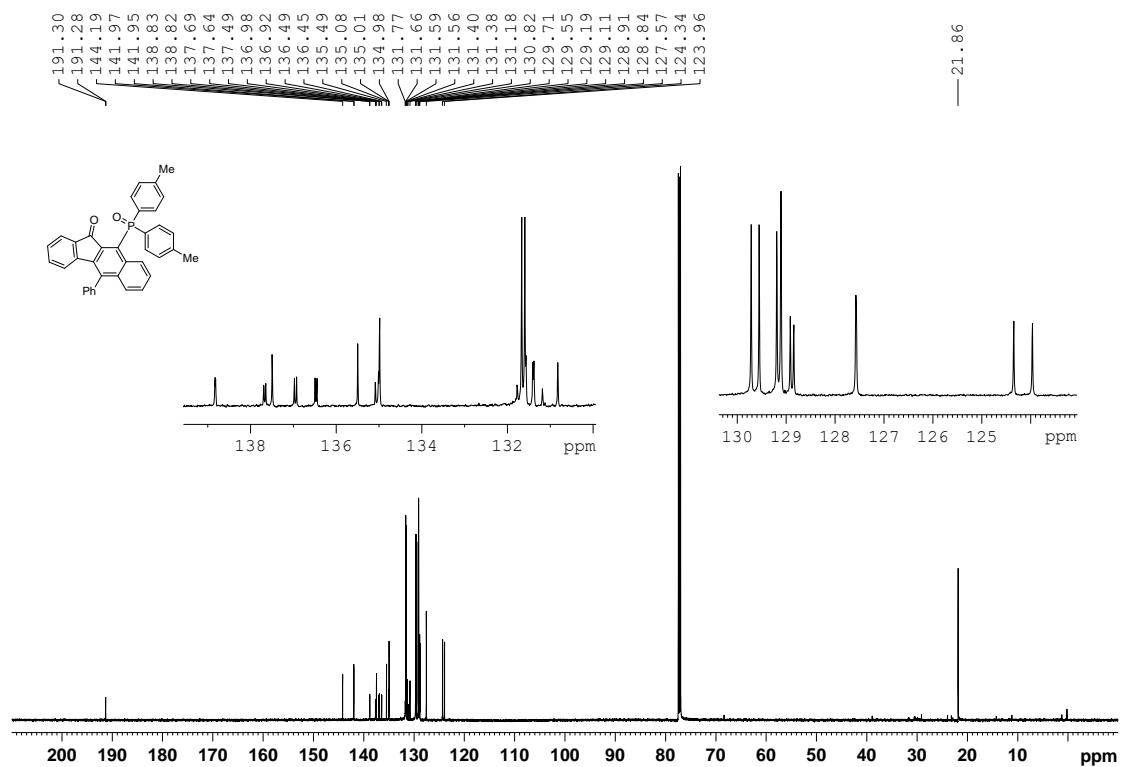

$^{13}\text{C}\{^1\text{H}\}$  NMR (125 MHz,  $\text{CDCl}_3$ ) spectrum of compound **3q**

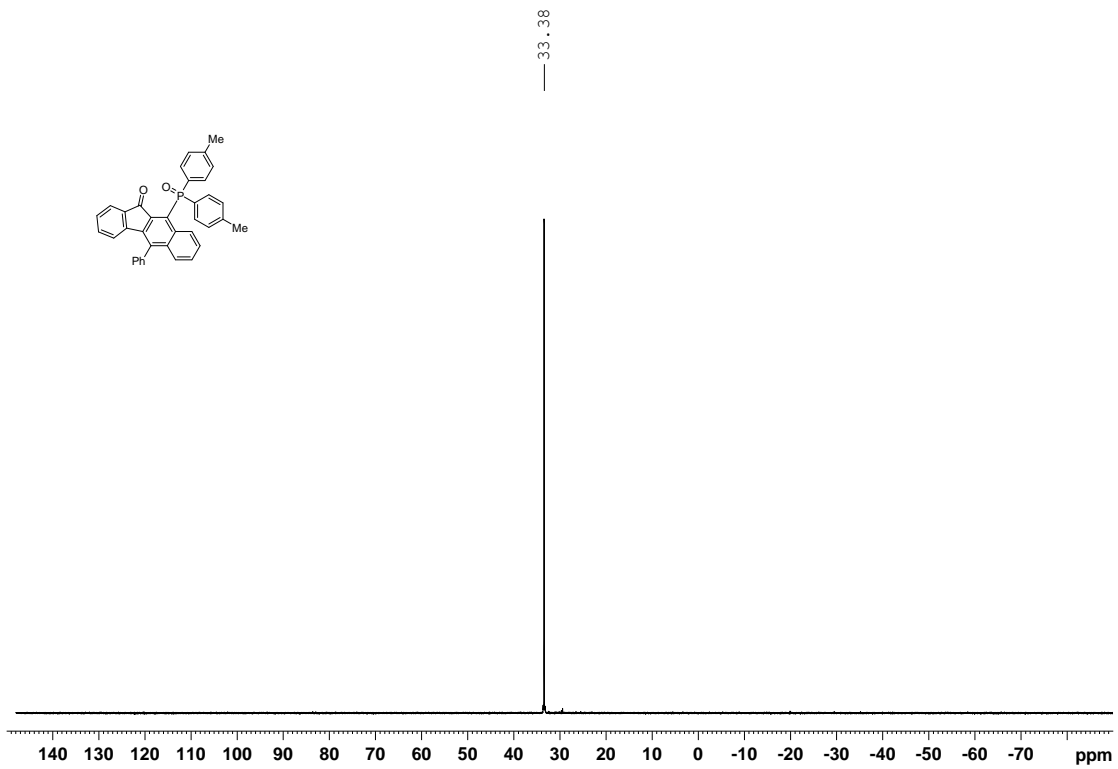

$^{31}\text{P}\{^1\text{H}\}$  NMR (202 MHz,  $\text{CDCl}_3$ ) spectrum of compound **3q**

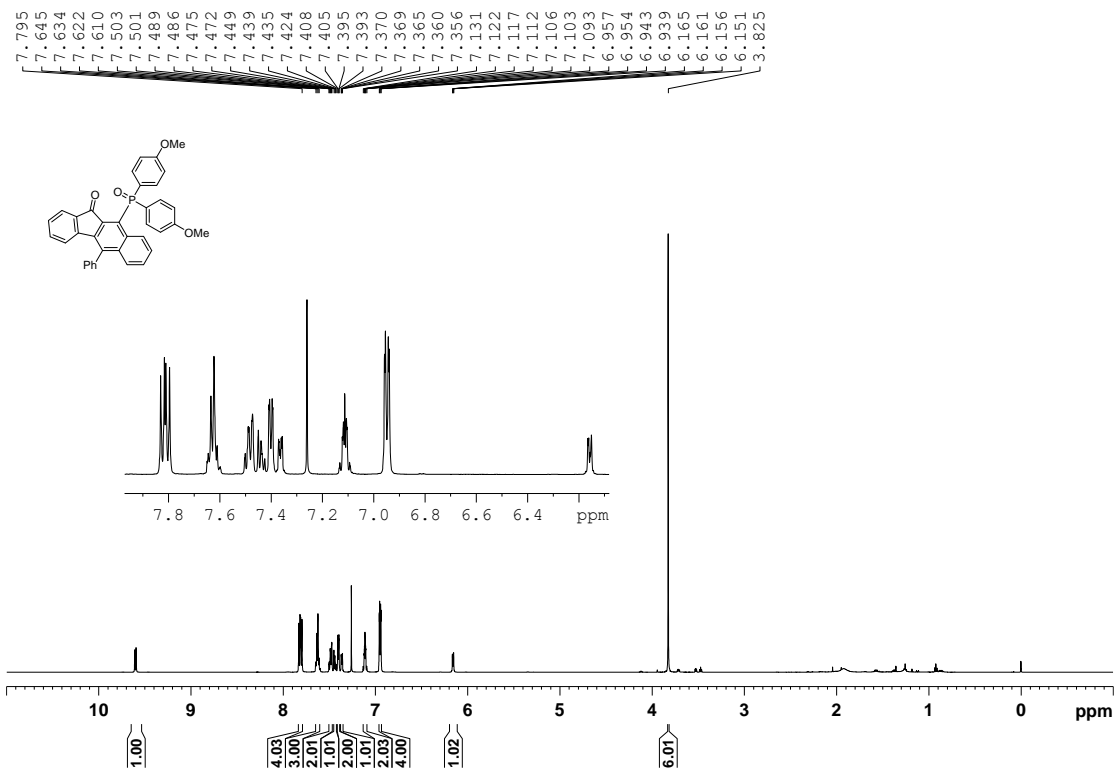

$^1\text{H}$  NMR (500 MHz,  $\text{CDCl}_3$ ) spectrum of compound **3r**

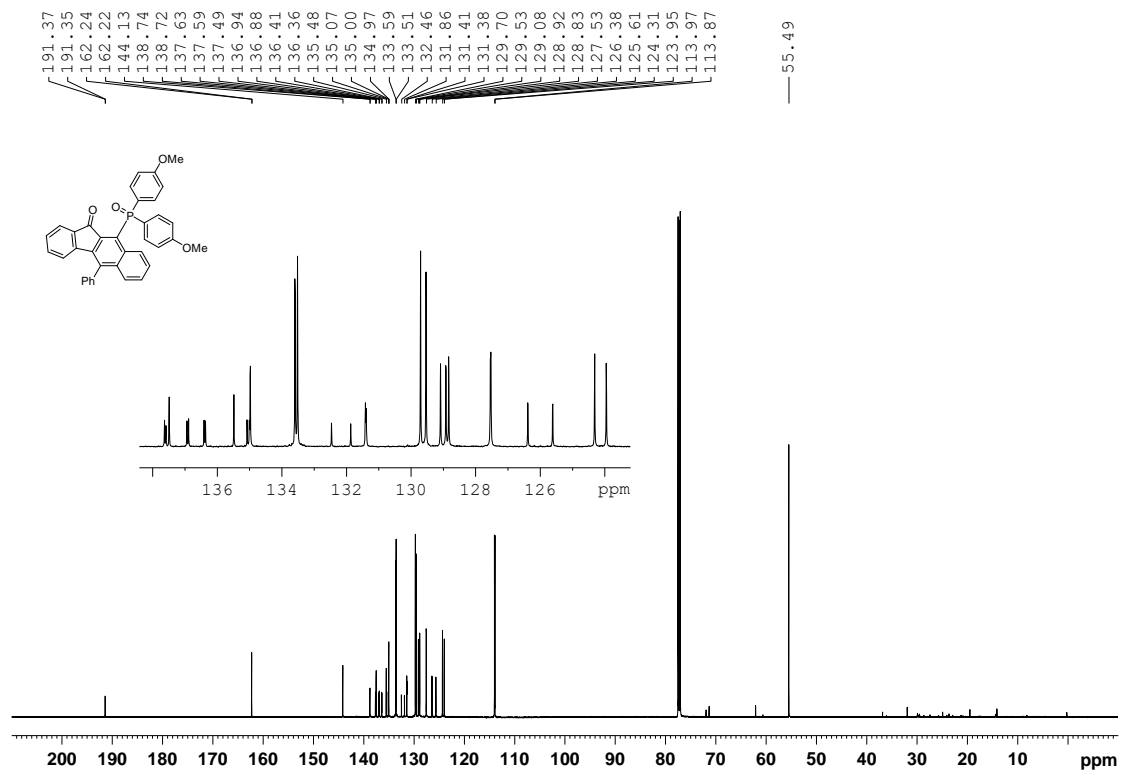

<sup>13</sup>C{<sup>1</sup>H} NMR (125 MHz, CDCl<sub>3</sub>) spectrum of compound **3r**

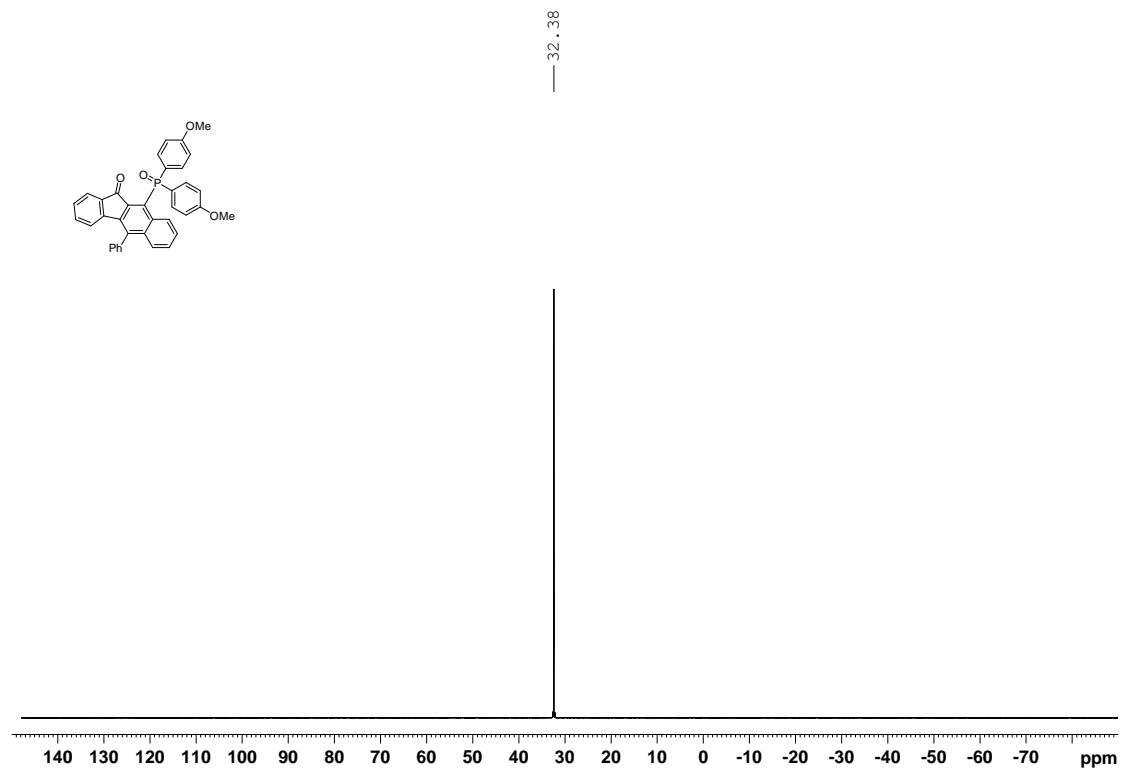

<sup>31</sup>P{<sup>1</sup>H} NMR (202 MHz, CDCl<sub>3</sub>) spectrum of compound **3r**

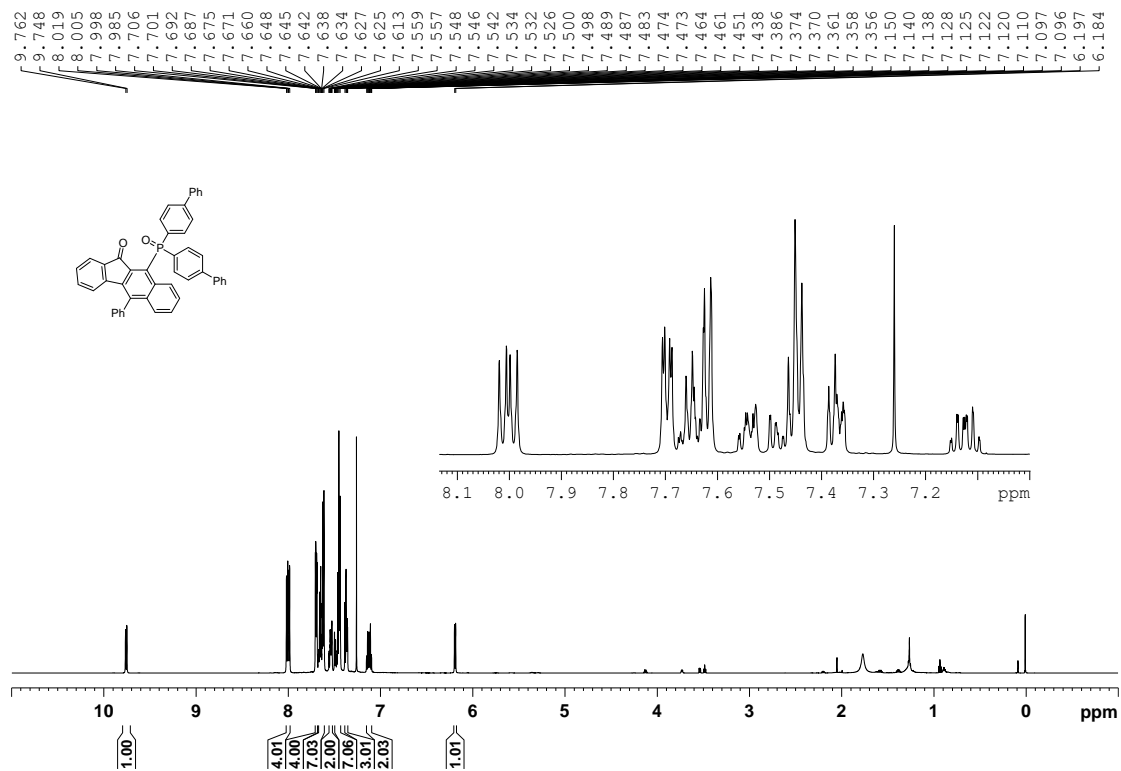

$^1\text{H}$  NMR (500 MHz,  $\text{CDCl}_3$ ) spectrum of compound **3s**

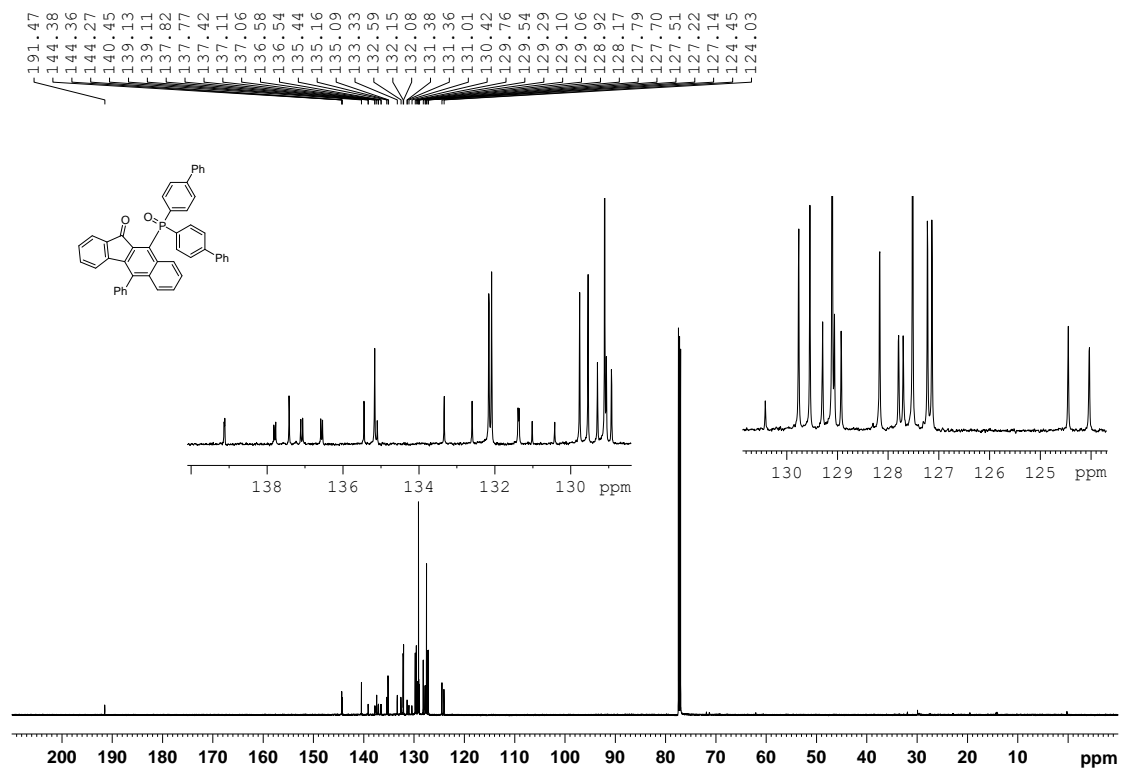

$^{13}\text{C}\{^1\text{H}\}$  NMR (125 MHz,  $\text{CDCl}_3$ ) spectrum of compound **3s**

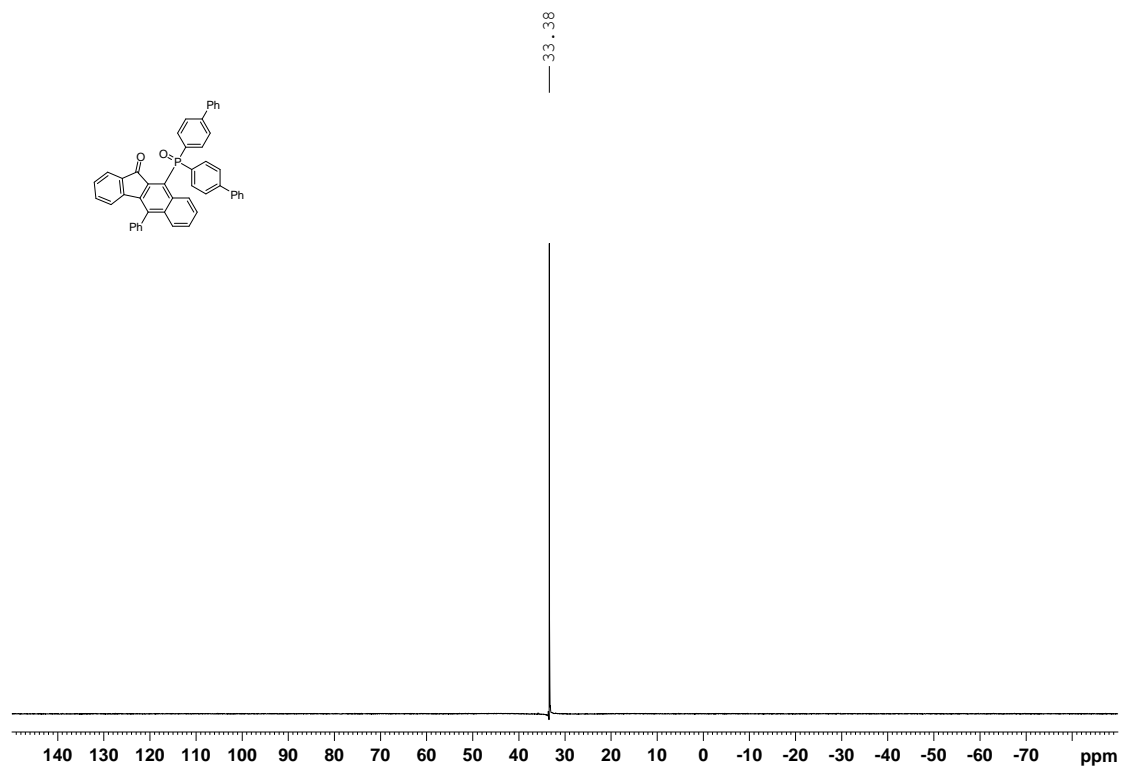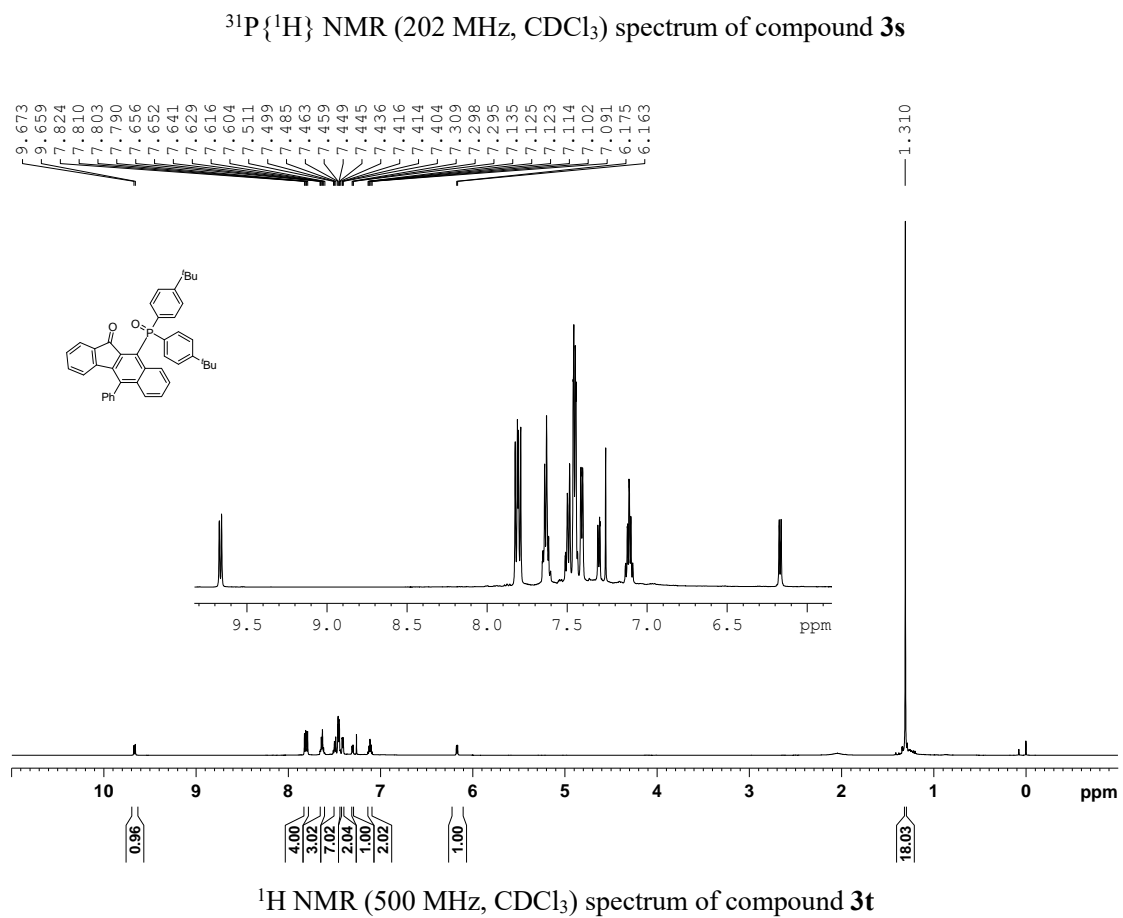

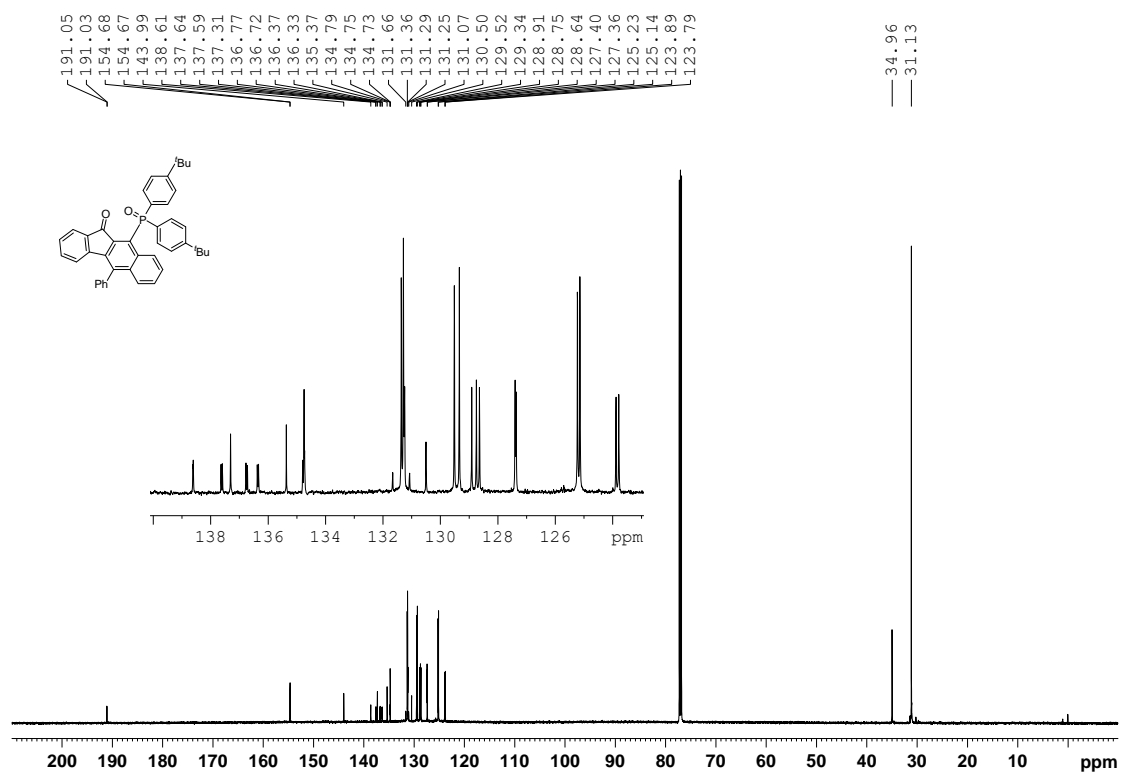

$^{13}\text{C}\{^1\text{H}\}$  NMR (125 MHz,  $\text{CDCl}_3$ ) spectrum of compound **3t**

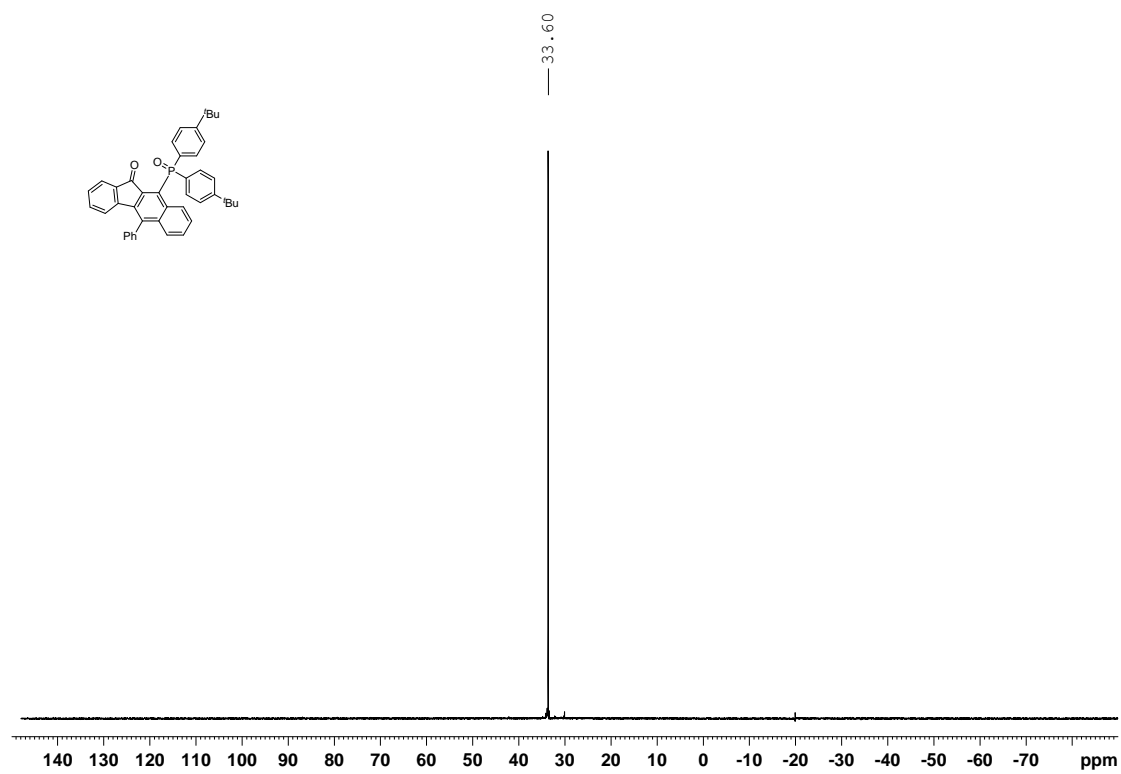

$^{31}\text{P}\{^1\text{H}\}$  NMR (202 MHz,  $\text{CDCl}_3$ ) spectrum of compound **3t**

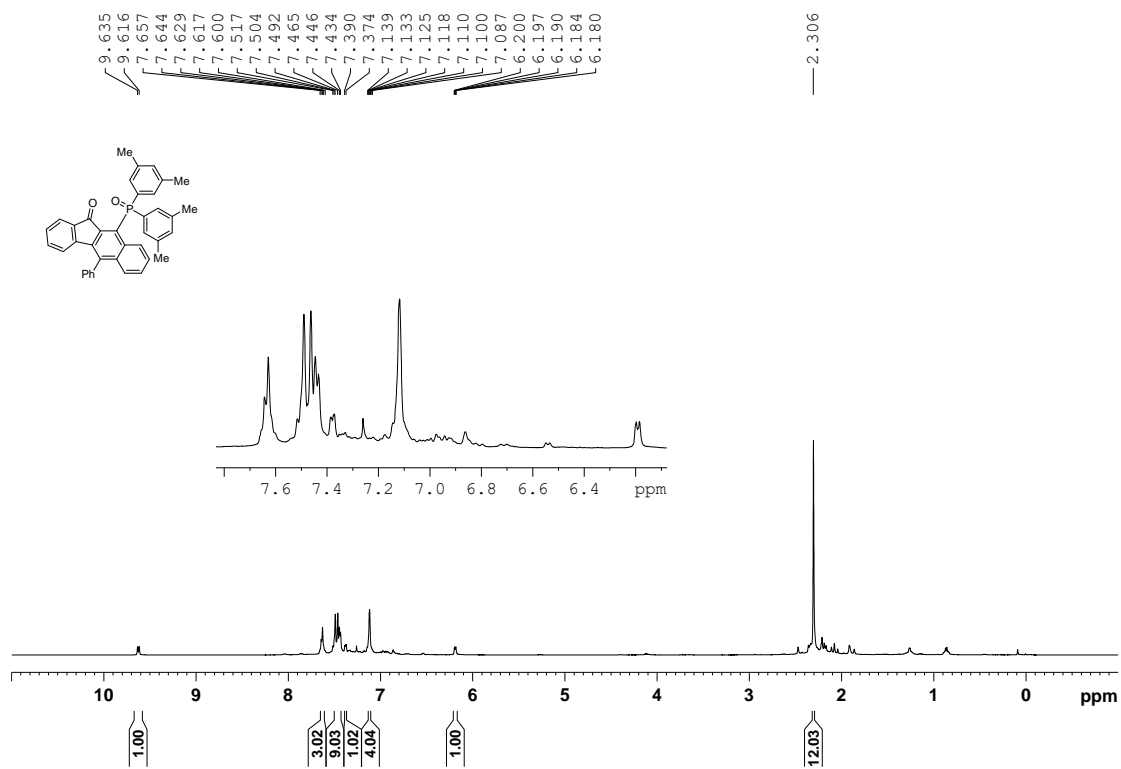

$^1\text{H}$  NMR (500 MHz,  $\text{CDCl}_3$ ) spectrum of compound **3u**

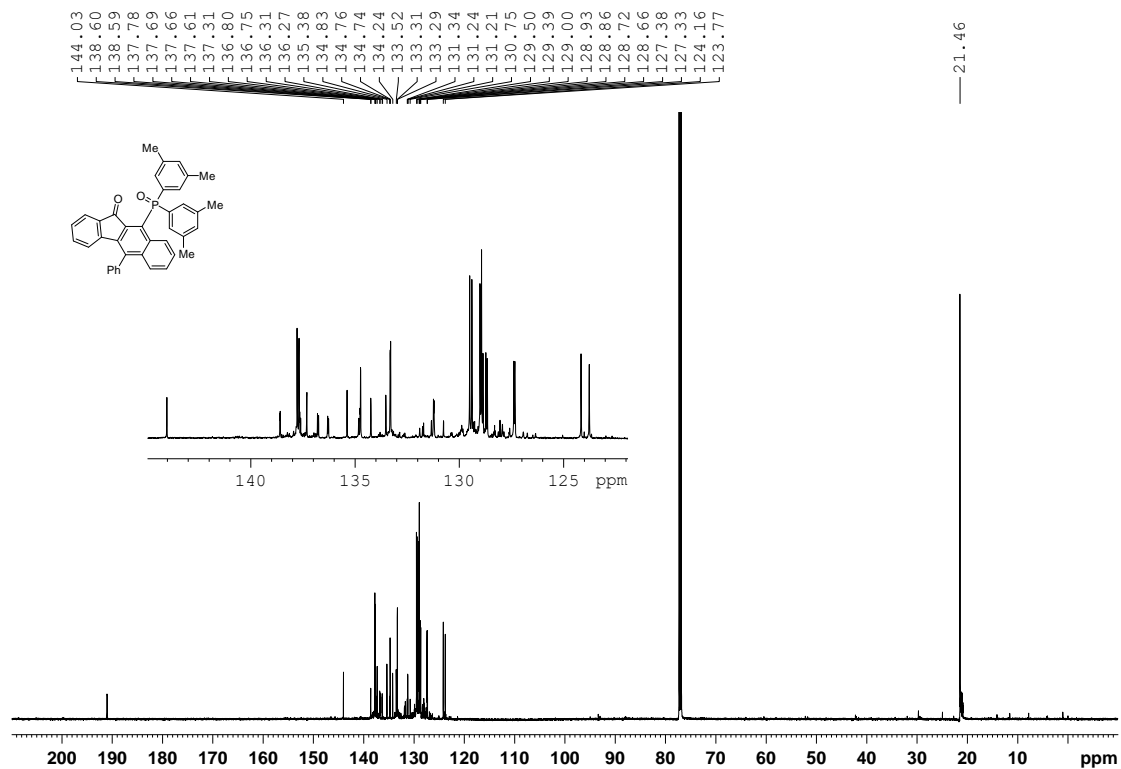

$^{13}\text{C}\{^1\text{H}\}$  NMR (125 MHz,  $\text{CDCl}_3$ ) spectrum of compound **3u**



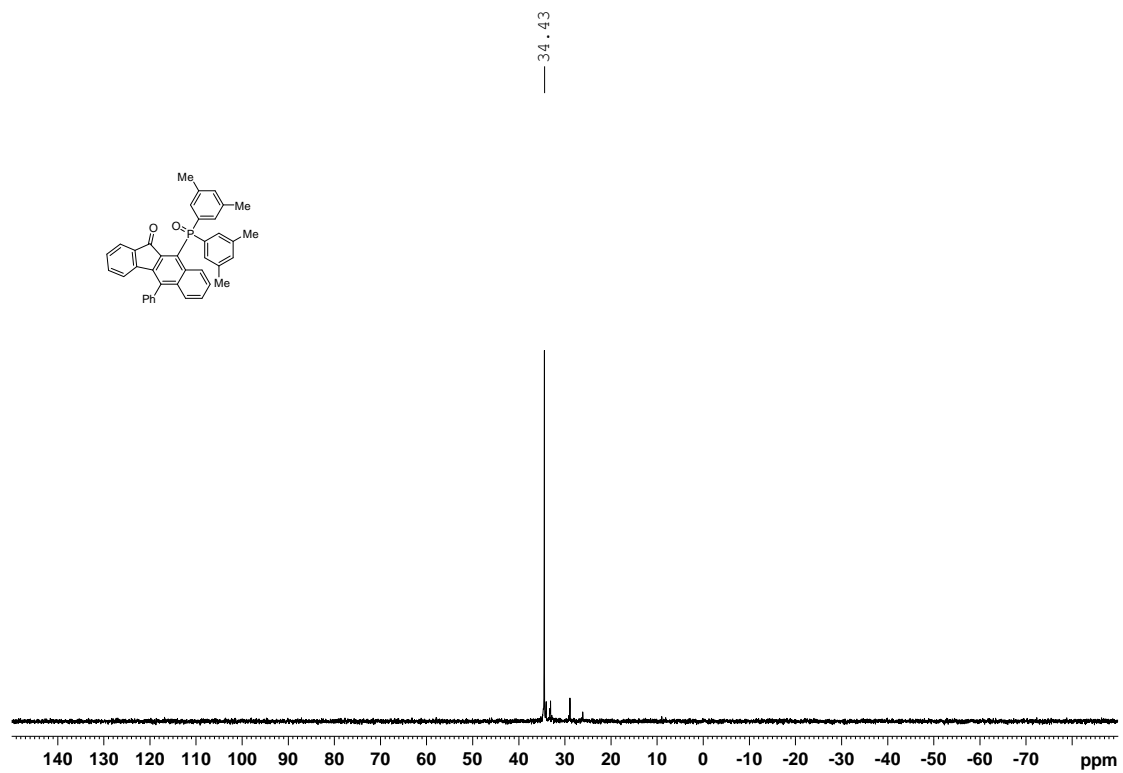

$^{31}\text{P}\{^1\text{H}\}$  NMR (202 MHz,  $\text{CDCl}_3$ ) spectrum of compound **3u**

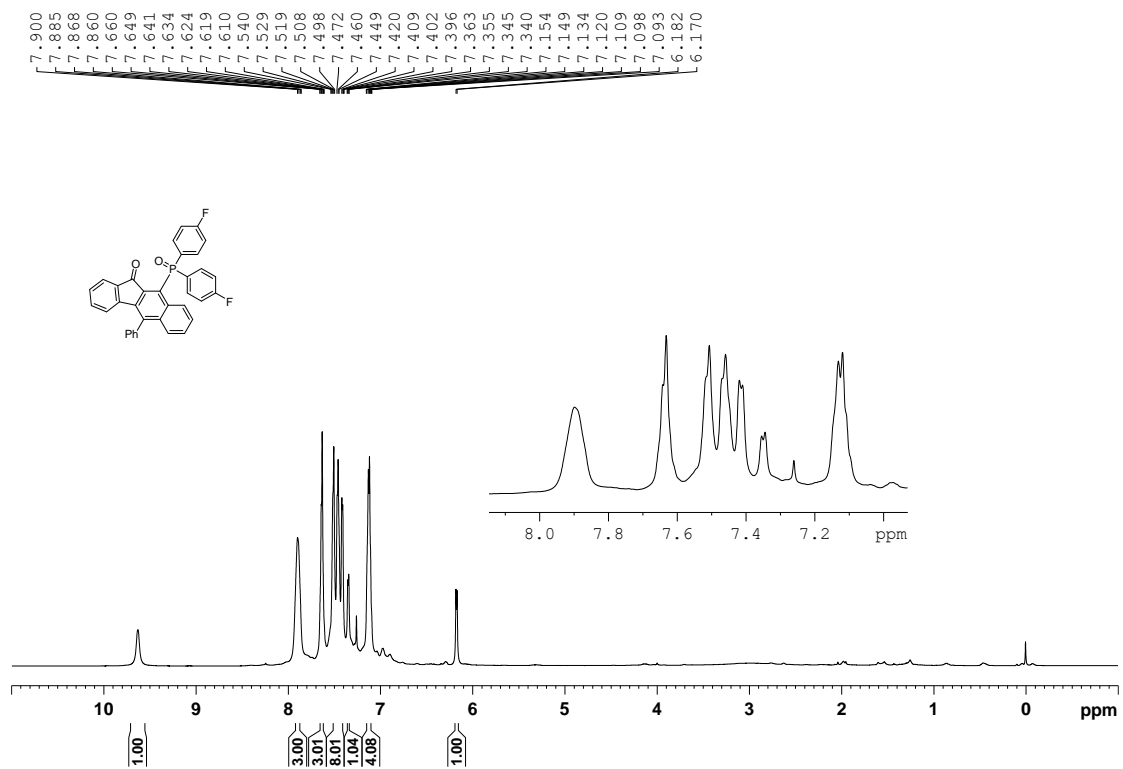

$^1\text{H}$  NMR (500 MHz,  $\text{CDCl}_3$ ) spectrum of compound **3v**

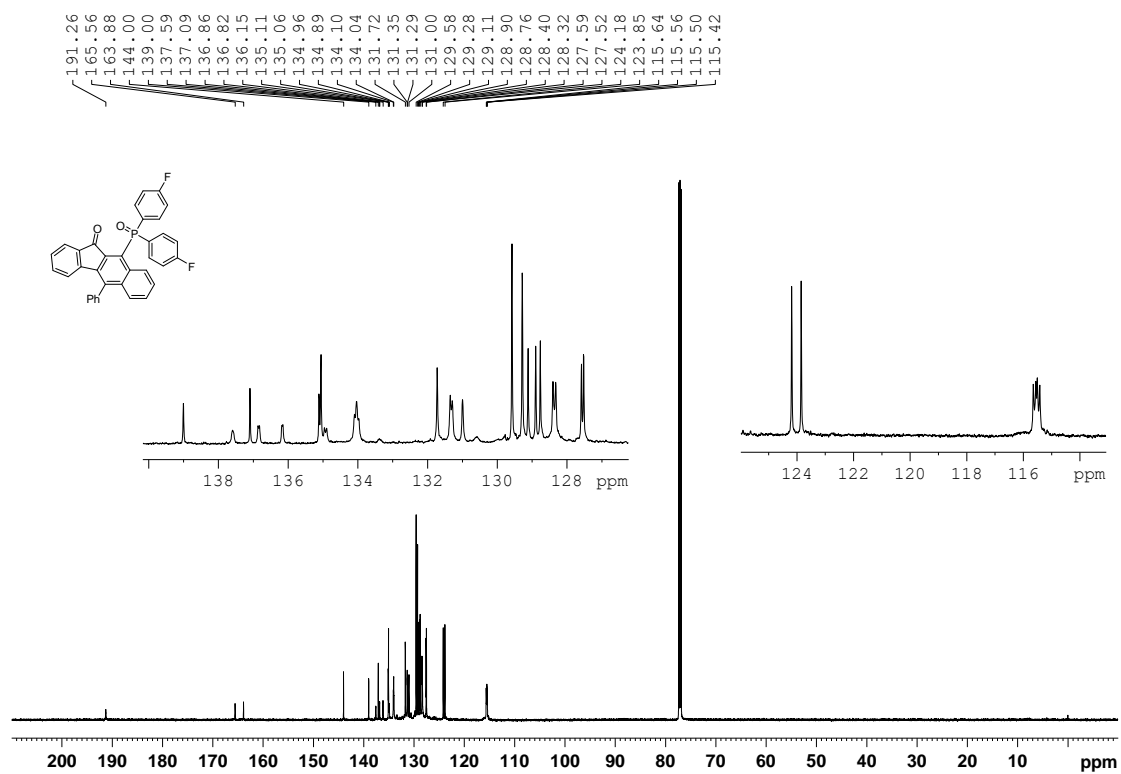

$^{13}\text{C}\{^1\text{H}\}$  NMR (125 MHz,  $\text{CDCl}_3$ ) spectrum of compound **3v**

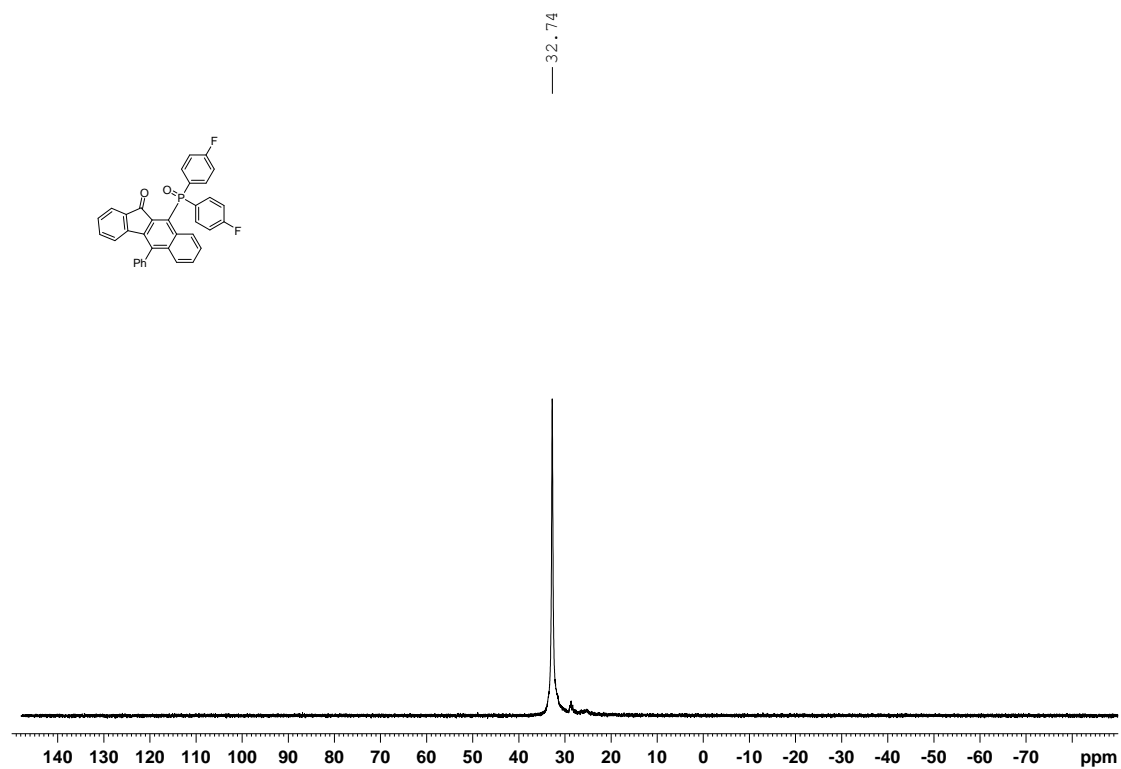

$^{31}\text{P}\{^1\text{H}\}$  NMR (202 MHz,  $\text{CDCl}_3$ ) spectrum of compound **3v**

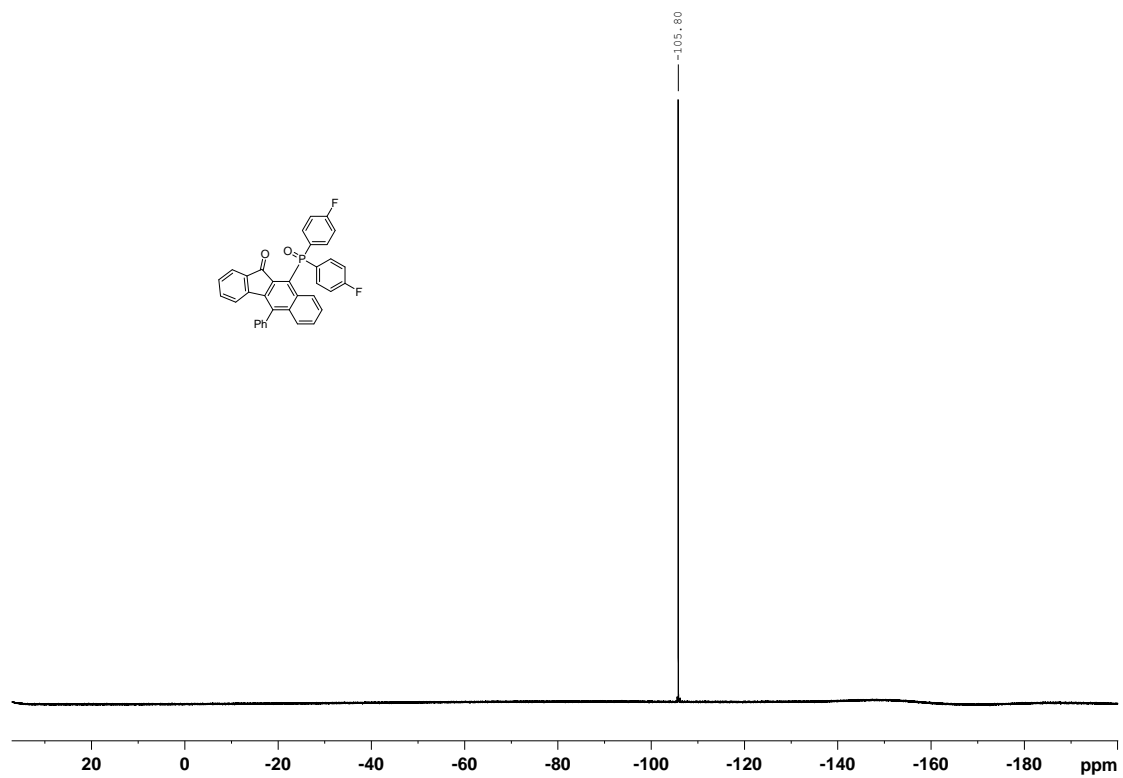

$^{19}\text{F}$   $\{^1\text{H}\}$  NMR (471 MHz,  $\text{CDCl}_3$ ) spectrum of compound **3v**

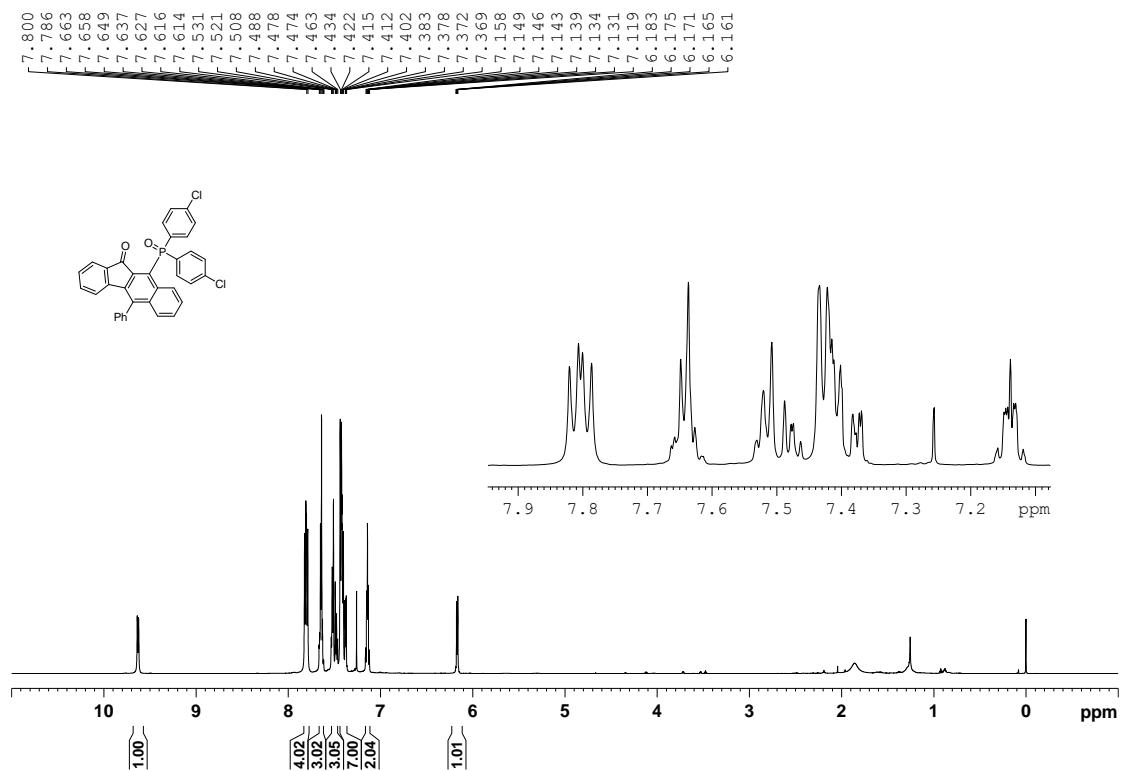

$^1\text{H}$  NMR (500 MHz,  $\text{CDCl}_3$ ) spectrum of compound **3w**

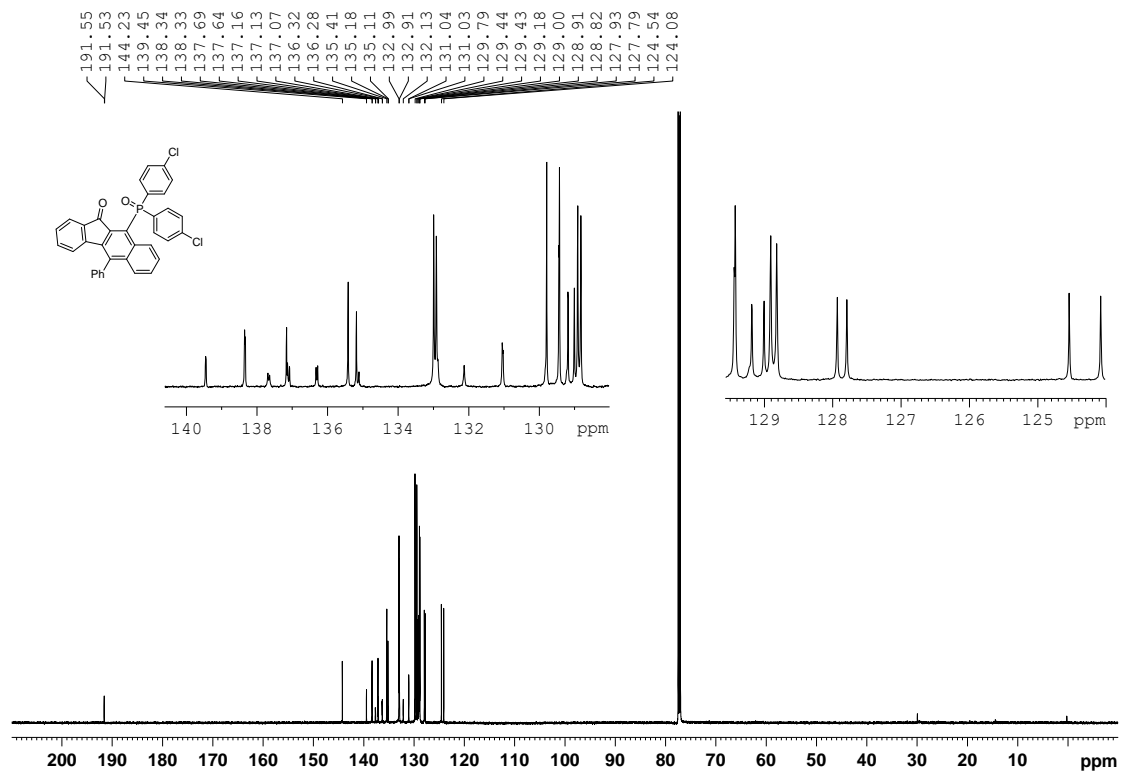

$^{13}\text{C}\{^1\text{H}\}$  NMR (125 MHz,  $\text{CDCl}_3$ ) spectrum of compound **3w**

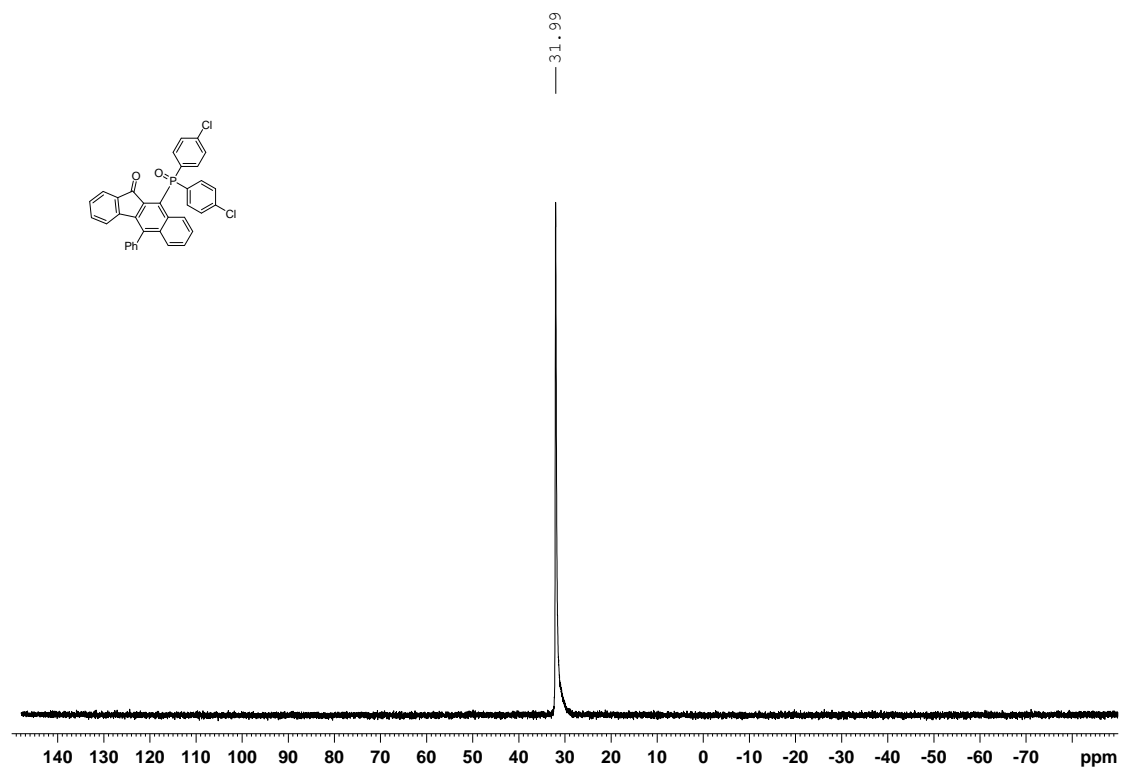

$^{31}\text{P}\{^1\text{H}\}$  NMR (202 MHz,  $\text{CDCl}_3$ ) spectrum of compound **3w**

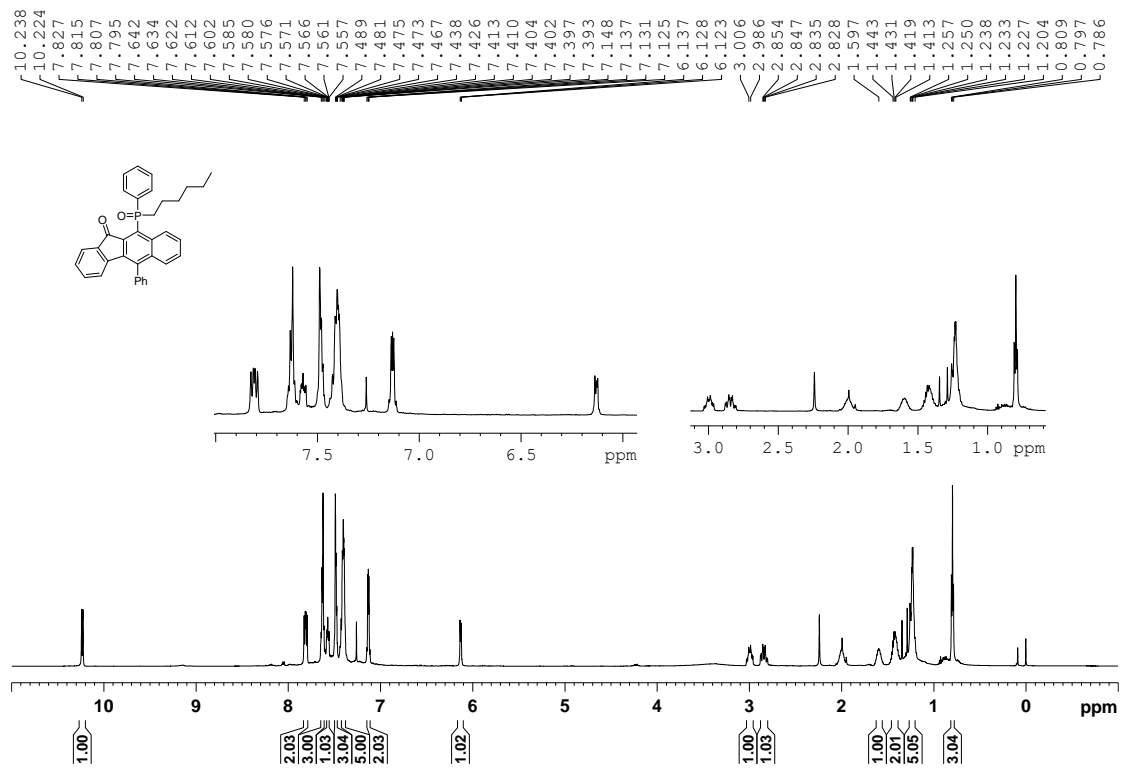

<sup>1</sup>H NMR (500 MHz, CDCl<sub>3</sub>) spectrum of compound **3x**

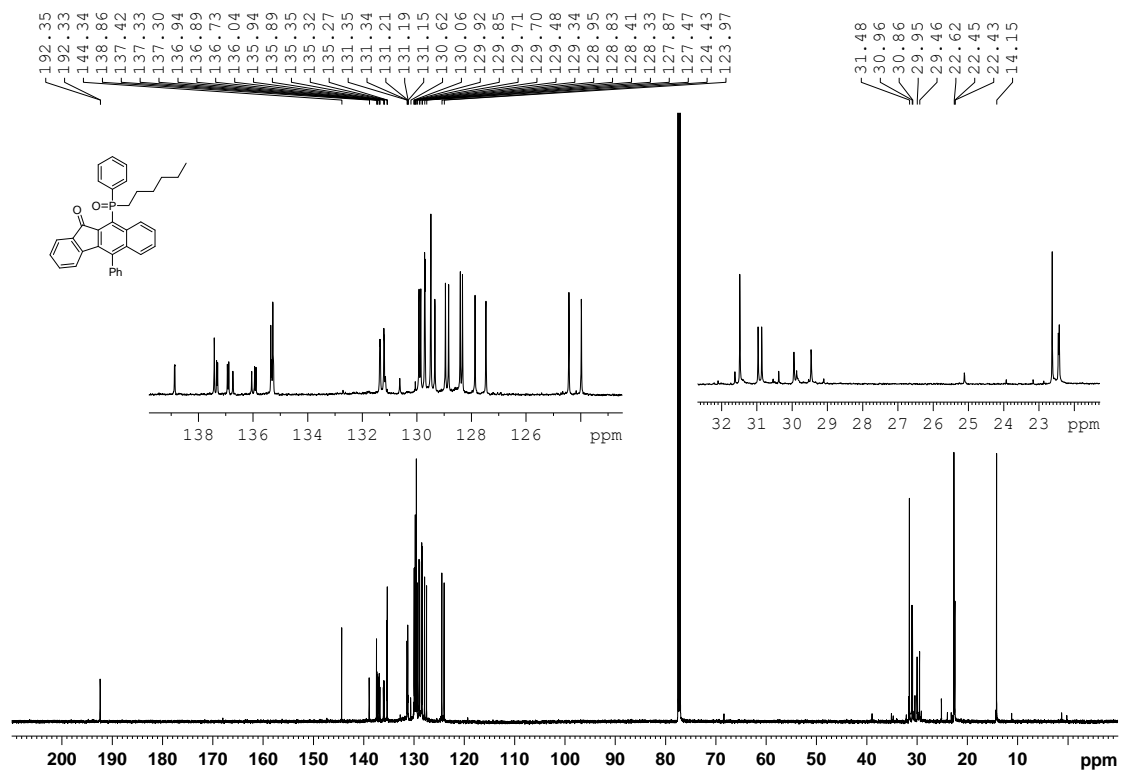

<sup>13</sup>C{<sup>1</sup>H} NMR (125 MHz, CDCl<sub>3</sub>) spectrum of compound **3x**

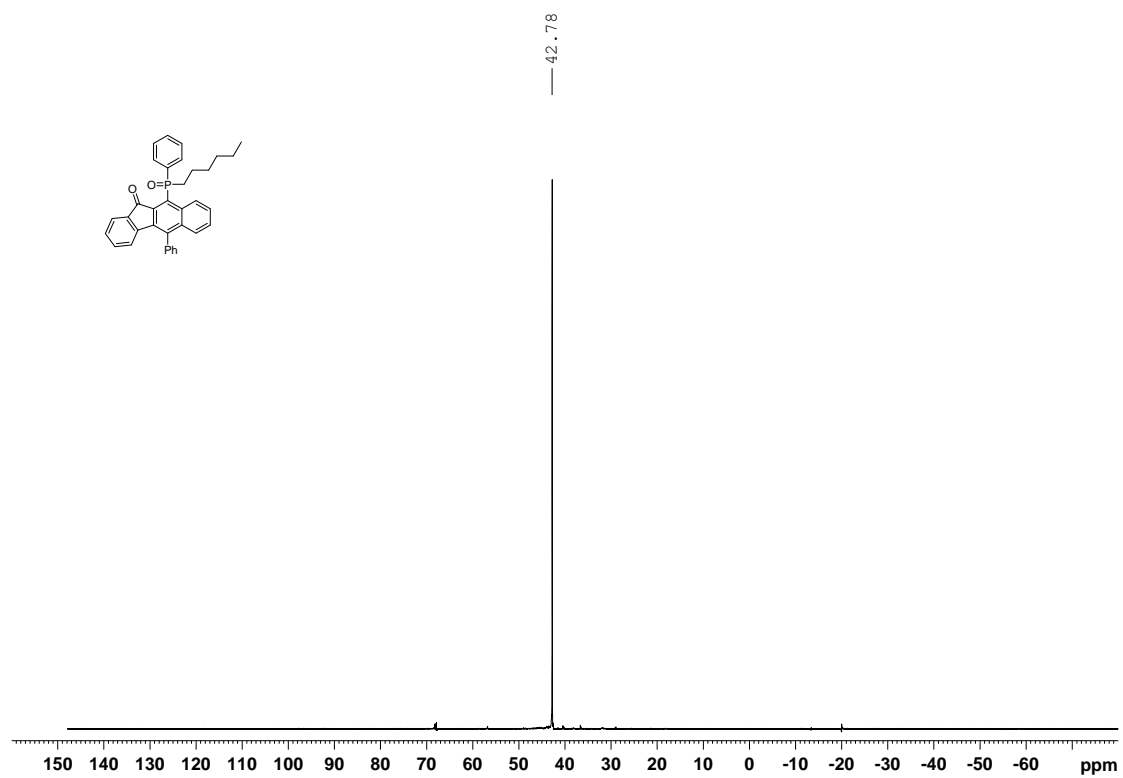

$^{31}\text{P}$  { $^1\text{H}$ } NMR (202 MHz,  $\text{CDCl}_3$ ) spectrum of compound **3x**

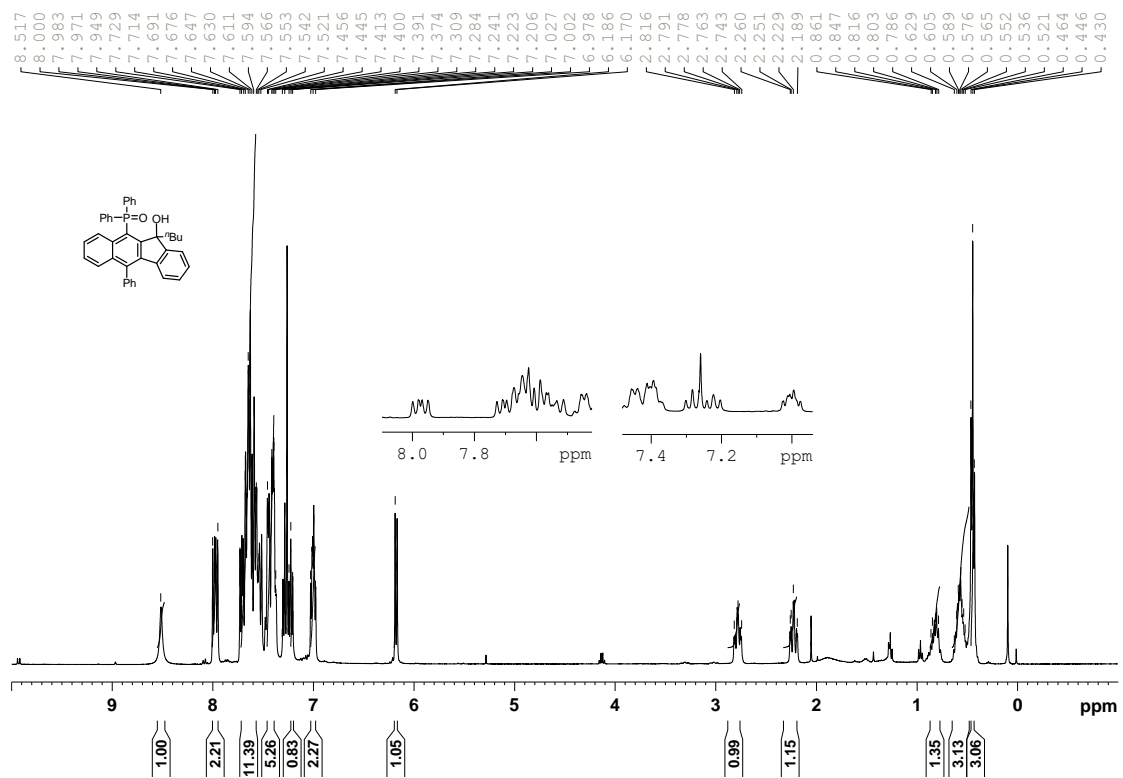

$^1\text{H}$  NMR (500 MHz,  $\text{CDCl}_3$ ) spectrum of compound **5a**

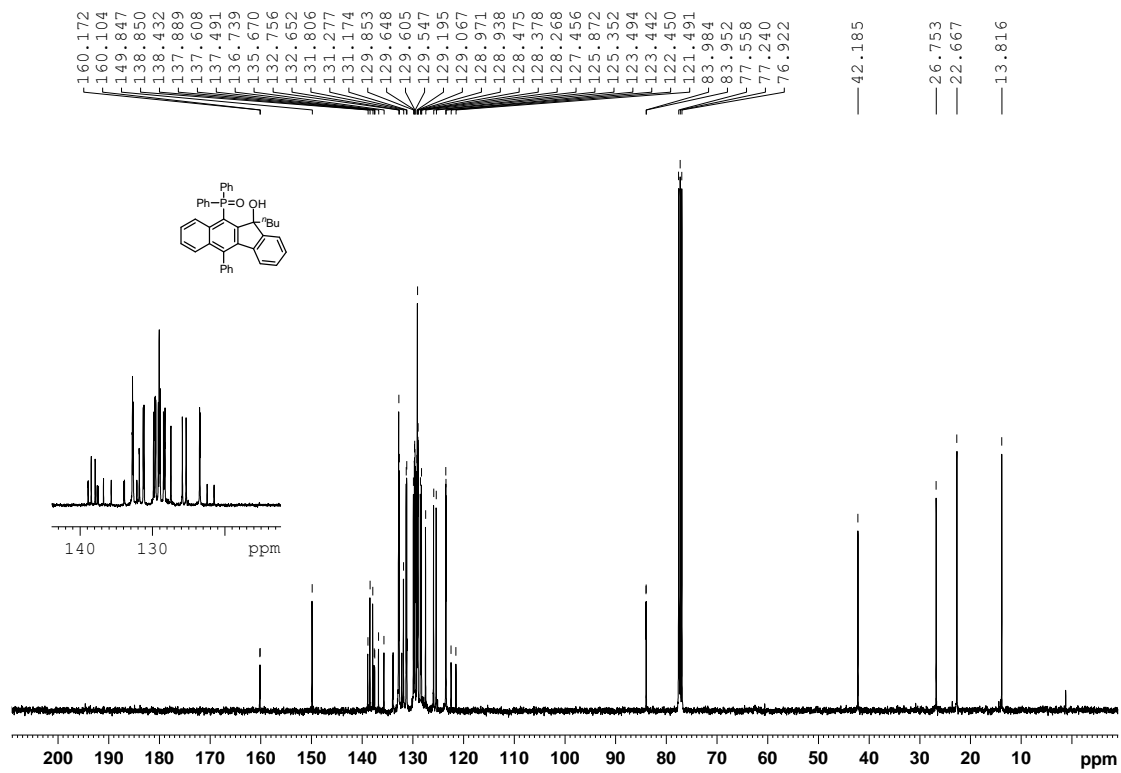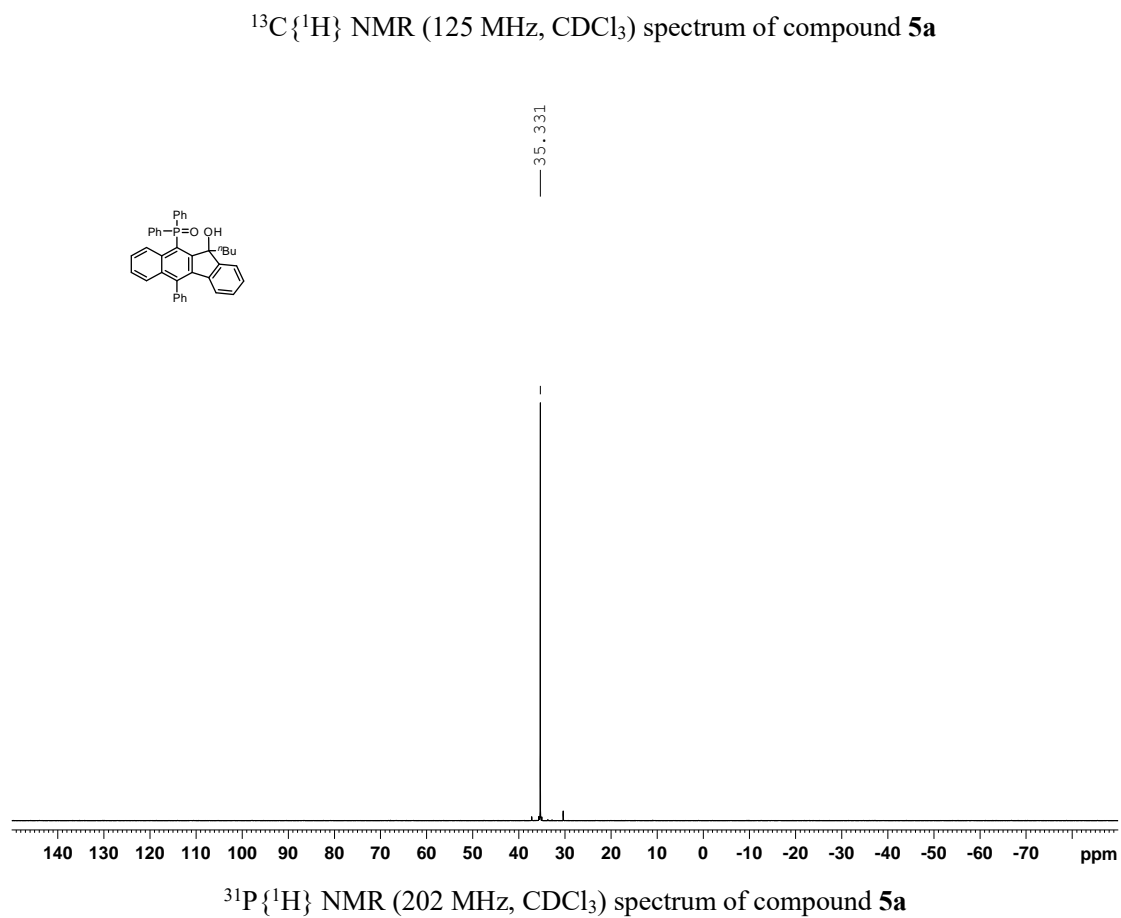

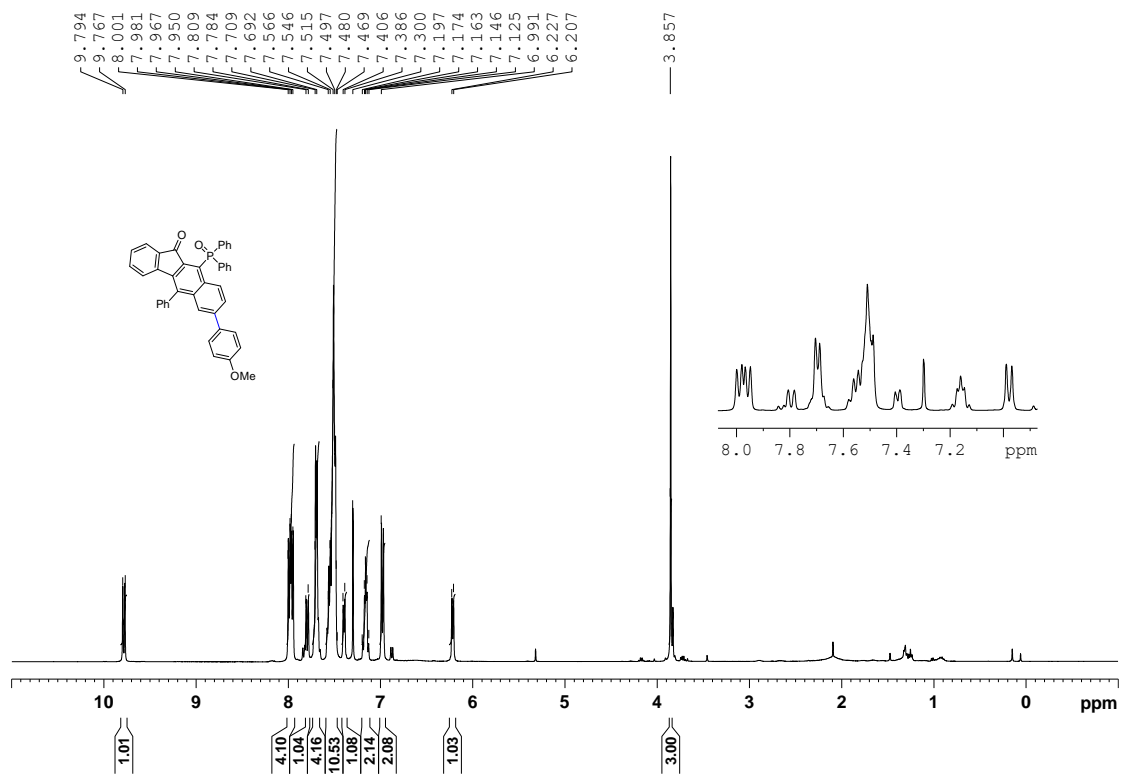

$^{31}\text{P}\{^1\text{H}\}$  NMR (202 MHz,  $\text{CDCl}_3$ ) spectrum of compound **5b**

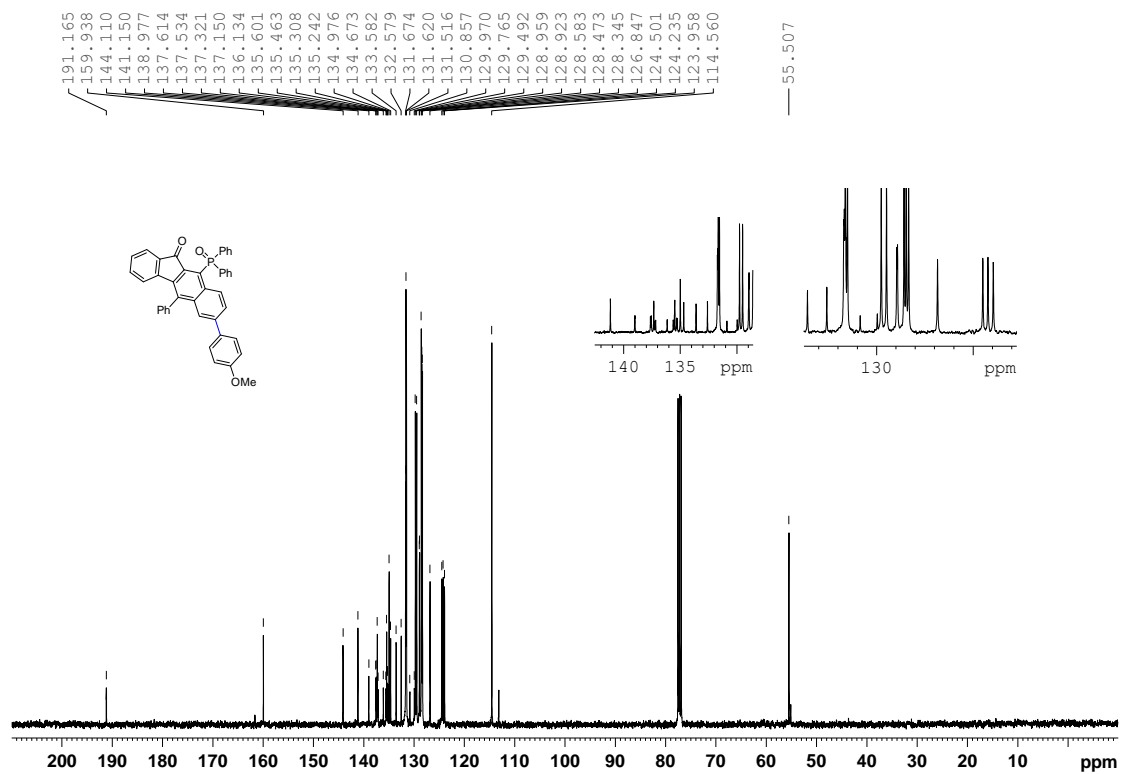

$^{13}\text{C}\{^1\text{H}\}$  NMR (125 MHz,  $\text{CDCl}_3$ ) spectrum of compound **5b**



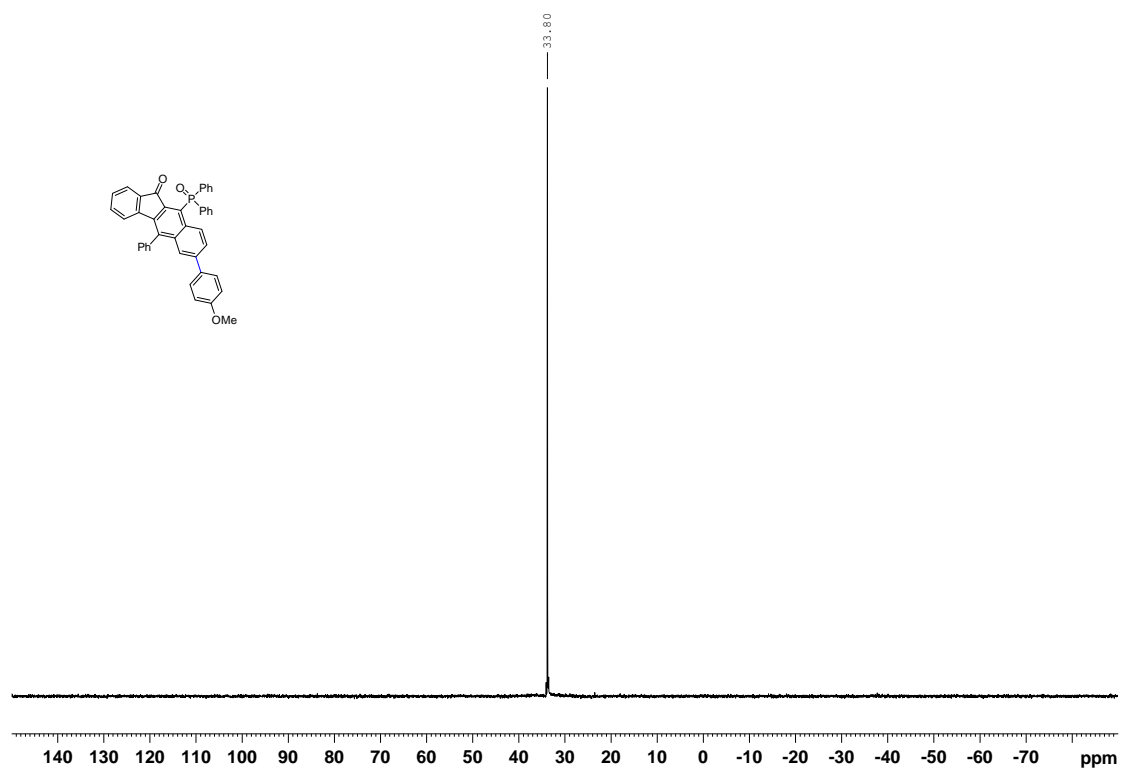

$^{31}\text{P}\{^1\text{H}\}$  NMR (202 MHz,  $\text{CDCl}_3$ ) spectrum of compound **5b**

## 5. Crystallographic spectrum for 3a

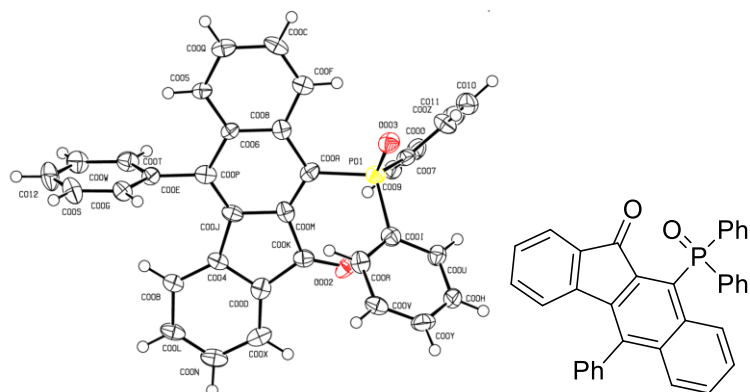

**Table 1 Crystal data and structure refinement for 3a.**

|                                             |                                                               |
|---------------------------------------------|---------------------------------------------------------------|
| Identification code                         | exp_12276                                                     |
| Empirical formula                           | C <sub>35</sub> H <sub>23</sub> O <sub>2</sub> P              |
| Formula weight                              | 506.50                                                        |
| Temperature/K                               | 100.01(10)                                                    |
| Crystal system                              | orthorhombic                                                  |
| Space group                                 | P2 <sub>1</sub> 2 <sub>1</sub> 2 <sub>1</sub>                 |
| a/Å                                         | 7.9969(4)                                                     |
| b/Å                                         | 11.5978(5)                                                    |
| c/Å                                         | 26.9058(16)                                                   |
| α/°                                         | 90                                                            |
| β/°                                         | 90                                                            |
| γ/°                                         | 90                                                            |
| Volume/Å <sup>3</sup>                       | 2495.4(2)                                                     |
| Z                                           | 4                                                             |
| ρ <sub>calc</sub> /cm <sup>3</sup>          | 1.348                                                         |
| μ/mm <sup>-1</sup>                          | 0.143                                                         |
| F(000)                                      | 1056.0                                                        |
| Radiation                                   | MoKα (λ = 0.71073)                                            |
| 2θ range for data collection/°              | 6.826 to 55.952                                               |
| Index ranges                                | -10 ≤ h ≤ 8, -13 ≤ k ≤ 15, -34 ≤ l ≤ 28                       |
| Reflections collected                       | 8060                                                          |
| Independent reflections                     | 4515 [R <sub>int</sub> = 0.0429, R <sub>sigma</sub> = 0.0670] |
| Data/restraints/parameters                  | 4515/0/343                                                    |
| Goodness-of-fit on F <sup>2</sup>           | 1.089                                                         |
| Final R indexes [I >= 2σ (I)]               | R <sub>1</sub> = 0.0673, wR <sub>2</sub> = 0.1553             |
| Final R indexes [all data]                  | R <sub>1</sub> = 0.0800, wR <sub>2</sub> = 0.1641             |
| Largest diff. peak/hole / e Å <sup>-3</sup> | 1.13/-0.43                                                    |
| Flack parameter                             | -0.01(9)                                                      |

**Table 2 Fractional Atomic Coordinates ( $\times 10^4$ ) and Equivalent Isotropic Displacement Parameters ( $\text{\AA}^2 \times 10^3$ ) for exp\_12276.  $U_{\text{eq}}$  is defined as 1/3 of the trace of the orthogonalised  $U_{\text{IJ}}$  tensor.**

| Atom | $x$        | $y$       | $z$        | $U(\text{eq})$ |
|------|------------|-----------|------------|----------------|
| P01  | 9017.9(19) | 658.0(12) | 3563.5(5)  | 26.4(3)        |
| O002 | 5975(6)    | 1785(3)   | 2951.1(14) | 35.6(10)       |
| O003 | 10056(5)   | -28(3)    | 3913.7(14) | 33.4(10)       |
| C004 | 5201(7)    | 4218(5)   | 3716.1(19) | 23.7(12)       |
| C005 | 10546(6)   | 4217(5)   | 4707.1(18) | 22.6(11)       |
| C006 | 9455(7)    | 3721(4)   | 4359.1(19) | 21.1(11)       |
| C007 | 10001(7)   | 778(5)    | 2967(2)    | 26.3(12)       |
| C008 | 9861(7)    | 2653(4)   | 4131.9(19) | 25.1(12)       |
| C009 | 9647(7)    | 1603(5)   | 2597(2)    | 27.6(12)       |
| C00A | 8685(7)    | 2139(5)   | 3783.9(19) | 26.1(12)       |
| C00B | 4179(7)    | 5148(4)   | 3824.4(19) | 24.7(11)       |
| C00C | 12522(7)   | 2683(5)   | 4555(2)    | 30.0(13)       |
| C00D | 4623(7)    | 3390(4)   | 3368(2)    | 27.0(13)       |
| C00E | 7461(7)    | 5435(4)   | 4482.6(19) | 24.6(12)       |
| C00F | 11443(7)   | 2183(5)   | 4234(2)    | 27.1(13)       |
| C00G | 6633(7)    | 5469(5)   | 4936(2)    | 27.3(13)       |
| C00H | 5374(8)    | -1616(5)  | 3187(2)    | 37.2(15)       |
| C00I | 7024(7)    | -56(5)    | 3517(2)    | 28.7(12)       |
| C00J | 6838(7)    | 3835(5)   | 3899(2)    | 25.6(12)       |
| C00K | 5912(7)    | 2518(5)   | 3286.6(19) | 27.1(12)       |
| C00L | 2611(7)    | 5203(5)   | 3599(2)    | 31.0(13)       |
| C00M | 7255(7)    | 2747(4)   | 3661.0(19) | 26.0(12)       |
| C00N | 2055(8)    | 4396(5)   | 3271(2)    | 34.7(14)       |
| C00O | 10621(8)   | 1686(5)   | 2176(2)    | 32.5(14)       |
| C00P | 7891(7)    | 4300(5)   | 4241.1(19) | 25.3(12)       |
| C00Q | 12076(8)   | 3726(5)   | 4810(2)    | 31.1(13)       |
| C00R | 5848(8)    | 73(5)     | 3901(2)    | 30.5(13)       |
| C00S | 6298(9)    | 6508(5)   | 5161(2)    | 39.8(16)       |
| C00T | 7918(8)    | 6464(5)   | 4260(2)    | 32.4(14)       |
| C00U | 6762(8)    | -898(5)   | 3155(2)    | 29.0(13)       |
| C00V | 4455(7)    | -657(5)   | 3928(2)    | 32.6(13)       |
| C00W | 7551(8)    | 7519(5)   | 4476(2)    | 36.1(15)       |
| C00X | 3064(8)    | 3478(5)   | 3145(2)    | 31.0(14)       |
| C00Y | 4255(8)    | -1516(5)  | 3576(3)    | 39.6(15)       |
| C00Z | 11381(7)   | 35(6)     | 2883(2)    | 35.8(14)       |
| C010 | 12336(8)   | 158(6)    | 2462(2)    | 42.0(16)       |
| C011 | 11967(8)   | 962(5)    | 2113(2)    | 37.8(15)       |
| C012 | 6748(10)   | 7528(6)   | 4933(3)    | 44.6(17)       |

**Table 3 Anisotropic Displacement Parameters ( $\text{\AA}^2 \times 10^3$ ) for exp\_12276. The Anisotropic displacement factor exponent takes the form:  $-2\pi^2[h^2a^{*2}U_{11}+2hka^*b^*U_{12}+\dots]$ .**

| Atom | $U_{11}$ | $U_{22}$ | $U_{33}$ | $U_{23}$ | $U_{13}$ | $U_{12}$ |
|------|----------|----------|----------|----------|----------|----------|
| P01  | 25.5(7)  | 29.4(7)  | 24.1(7)  | 1.0(6)   | -0.9(6)  | 1.7(6)   |
| O002 | 45(3)    | 42(2)    | 20.2(19) | -4.4(18) | 2(2)     | -21(2)   |
| O003 | 36(2)    | 36(2)    | 28(2)    | -0.3(18) | -8.7(19) | 1(2)     |
| C004 | 21(3)    | 26(3)    | 24(3)    | 11(2)    | 3(2)     | 1(2)     |
| C005 | 21(3)    | 33(3)    | 14(2)    | 3(2)     | -1(2)    | -3(2)    |
| C006 | 22(3)    | 24(2)    | 17(2)    | 2(2)     | 2(2)     | -6(2)    |
| C007 | 23(3)    | 33(3)    | 23(3)    | -5(2)    | -2(2)    | -4(3)    |
| C008 | 29(3)    | 24(3)    | 23(3)    | 6(2)     | 8(2)     | -3(3)    |
| C009 | 27(3)    | 29(3)    | 27(3)    | -5(2)    | 2(2)     | -3(2)    |
| C00A | 30(3)    | 32(3)    | 17(2)    | -1(2)    | 2(2)     | -8(2)    |
| C00B | 23(3)    | 27(3)    | 25(3)    | 9(2)     | 2(2)     | 1(2)     |
| C00C | 21(3)    | 39(3)    | 30(3)    | 16(3)    | 5(3)     | 7(3)     |
| C00D | 36(3)    | 23(3)    | 22(3)    | 9(2)     | 6(3)     | -6(3)    |
| C00E | 25(3)    | 26(3)    | 23(3)    | 0(2)     | 1(2)     | -2(2)    |
| C00F | 26(3)    | 31(3)    | 24(3)    | 8(2)     | 2(2)     | 0(3)     |
| C00G | 30(3)    | 26(3)    | 26(3)    | 6(2)     | 0(2)     | 4(2)     |
| C00H | 33(3)    | 36(3)    | 43(4)    | -14(3)   | -11(3)   | 7(3)     |
| C00I | 29(3)    | 30(3)    | 27(3)    | 3(3)     | -3(3)    | 3(2)     |
| C00J | 21(3)    | 32(3)    | 24(3)    | 8(2)     | -1(2)    | 3(2)     |
| C00K | 24(3)    | 32(3)    | 26(3)    | 4(2)     | 3(3)     | -4(3)    |
| C00L | 21(3)    | 37(3)    | 35(3)    | 16(3)    | -2(3)    | 4(3)     |
| C00M | 30(3)    | 25(3)    | 23(3)    | 4(2)     | 10(2)    | 1(2)     |
| C00N | 25(3)    | 47(4)    | 32(3)    | 18(3)    | -4(3)    | 1(3)     |
| C00O | 37(4)    | 35(3)    | 25(3)    | -6(2)    | 6(3)     | -9(3)    |
| C00P | 26(3)    | 29(3)    | 21(3)    | 11(2)    | 1(2)     | -2(3)    |
| C00Q | 28(3)    | 45(3)    | 20(3)    | 6(3)     | -3(3)    | -8(3)    |
| C00R | 37(3)    | 31(3)    | 23(3)    | 3(2)     | 7(3)     | 1(3)     |
| C00S | 50(4)    | 39(3)    | 31(3)    | 0(3)     | 4(3)     | 16(3)    |
| C00T | 30(3)    | 33(3)    | 34(3)    | 5(3)     | 1(3)     | -2(3)    |
| C00U | 34(3)    | 27(3)    | 26(3)    | -1(2)    | -2(3)    | 1(3)     |
| C00V | 25(3)    | 37(3)    | 36(3)    | 8(3)     | -1(3)    | 5(3)     |
| C00W | 38(4)    | 23(3)    | 47(4)    | 11(3)    | -3(3)    | 3(3)     |
| C00X | 33(3)    | 37(3)    | 23(3)    | 10(3)    | -5(3)    | -12(3)   |
| C00Y | 27(3)    | 32(3)    | 59(4)    | 4(3)     | -14(3)   | -3(3)    |
| C00Z | 26(3)    | 44(3)    | 37(3)    | 1(3)     | 4(3)     | 8(3)     |
| C010 | 35(4)    | 56(4)    | 36(3)    | -13(3)   | 1(3)     | 4(3)     |
| C011 | 34(3)    | 50(4)    | 28(3)    | -6(3)    | 4(3)     | -11(3)   |
| C012 | 61(5)    | 25(3)    | 48(4)    | -1(3)    | 1(4)     | 17(3)    |

**Table 4 Bond Lengths for 3a**

| Atom | Atom | Length/Å | Atom | Atom | Length/Å |
|------|------|----------|------|------|----------|
| P01  | O003 | 1.486(4) | C00D | C00X | 1.387(8) |
| P01  | C007 | 1.792(6) | C00E | C00G | 1.388(8) |
| P01  | C00A | 1.837(6) | C00E | C00P | 1.508(8) |
| P01  | C00I | 1.801(6) | C00E | C00T | 1.385(8) |
| O002 | C00K | 1.241(6) | C00G | C00S | 1.375(8) |
| C004 | C00B | 1.384(8) | C00H | C00U | 1.390(9) |
| C004 | C00D | 1.419(8) | C00H | C00Y | 1.382(9) |
| C004 | C00J | 1.468(8) | C00I | C00R | 1.404(8) |
| C005 | C006 | 1.403(7) | C00I | C00U | 1.395(8) |
| C005 | C00Q | 1.378(8) | C00J | C00M | 1.454(8) |
| C006 | C008 | 1.420(7) | C00J | C00P | 1.359(8) |
| C006 | C00P | 1.455(8) | C00K | C00M | 1.496(8) |
| C007 | C009 | 1.411(8) | C00L | C00N | 1.360(9) |
| C007 | C00Z | 1.418(8) | C00N | C00X | 1.378(9) |
| C008 | C00A | 1.454(8) | C00O | C011 | 1.375(9) |
| C008 | C00F | 1.405(8) | C00R | C00V | 1.401(8) |
| C009 | C00O | 1.377(8) | C00S | C012 | 1.381(9) |
| C00A | C00M | 1.383(8) | C00T | C00W | 1.386(8) |
| C00B | C00L | 1.394(8) | C00V | C00Y | 1.385(9) |
| C00C | C00F | 1.351(8) | C00W | C012 | 1.386(9) |
| C00C | C00Q | 1.437(8) | C00Z | C010 | 1.373(9) |
| C00D | C00K | 1.460(8) | C010 | C011 | 1.357(9) |

**Table 5 Bond Angles for 3a**

| Atom | Atom | Atom | Angle/°  | Atom | Atom | Atom | Angle/°  |
|------|------|------|----------|------|------|------|----------|
| O003 | P01  | C007 | 111.3(3) | C00Y | C00H | C00U | 120.9(6) |
| O003 | P01  | C00A | 112.1(2) | C00R | C00I | P01  | 119.5(4) |
| O003 | P01  | C00I | 107.0(3) | C00U | C00I | P01  | 120.2(4) |
| C007 | P01  | C00A | 106.3(3) | C00U | C00I | C00R | 119.2(5) |
| C007 | P01  | C00I | 111.2(3) | C00M | C00J | C004 | 108.7(5) |
| C00I | P01  | C00A | 108.9(3) | C00P | C00J | C004 | 131.3(5) |
| C00B | C004 | C00D | 118.3(5) | C00P | C00J | C00M | 120.0(5) |
| C00B | C004 | C00J | 133.8(5) | O002 | C00K | C00D | 127.7(5) |
| C00D | C004 | C00J | 107.9(5) | O002 | C00K | C00M | 125.6(5) |
| C00Q | C005 | C006 | 121.1(5) | C00D | C00K | C00M | 106.5(5) |
| C005 | C006 | C008 | 120.2(5) | C00N | C00L | C00B | 123.0(6) |

|                |          |                |          |
|----------------|----------|----------------|----------|
| C005 C006 C00P | 119.4(5) | C00A C00M C00J | 121.8(5) |
| C008 C006 C00P | 120.4(5) | C00A C00M C00K | 131.6(5) |
| C009 C007 P01  | 126.7(4) | C00J C00M C00K | 106.6(5) |
| C009 C007 C00Z | 117.0(5) | C00L C00N C00X | 120.0(6) |
| C00Z C007 P01  | 116.0(4) | C011 C00O C009 | 120.2(6) |
| C006 C008 C00A | 119.1(5) | C006 C00P C00E | 120.3(5) |
| C00F C008 C006 | 117.4(5) | C00J C00P C006 | 119.8(5) |
| C00F C008 C00A | 123.3(5) | C00J C00P C00E | 119.8(5) |
| C00O C009 C007 | 121.0(5) | C005 C00Q C00C | 118.2(5) |
| C008 C00A P01  | 119.8(4) | C00V C00R C00I | 120.5(5) |
| C00M C00A P01  | 121.2(4) | C00G C00S C012 | 120.2(6) |
| C00M C00A C008 | 118.7(5) | C00E C00T C00W | 121.5(6) |
| C004 C00B C00L | 118.4(5) | C00H C00U C00I | 119.8(6) |
| C00F C00C C00Q | 120.5(5) | C00Y C00V C00R | 119.4(6) |
| C004 C00D C00K | 109.7(5) | C012 C00W C00T | 118.5(6) |
| C00X C00D C004 | 121.9(5) | C00N C00X C00D | 118.5(6) |
| C00X C00D C00K | 128.4(5) | C00H C00Y C00V | 120.3(6) |
| C00G C00E C00P | 120.8(5) | C010 C00Z C007 | 120.2(6) |
| C00T C00E C00G | 118.8(5) | C011 C010 C00Z | 121.4(6) |
| C00T C00E C00P | 120.4(5) | C010 C011 C00O | 120.2(6) |
| C00C C00F C008 | 122.2(5) | C00S C012 C00W | 120.6(6) |
| C00S C00G C00E | 120.3(5) |                |          |

**Table 6 Hydrogen Atom Coordinates ( $\text{\AA}\times 10^4$ ) and Isotropic Displacement Parameters ( $\text{\AA}^2\times 10^3$ ) for 3a.**

| Atom | <i>x</i> | <i>y</i> | <i>z</i> | U(eq) |
|------|----------|----------|----------|-------|
| H005 | 10230    | 4889     | 4871     | 27    |
| H009 | 8742     | 2097     | 2637     | 33    |
| H00B | 4529     | 5721     | 4042     | 30    |
| H00C | 13563    | 2349     | 4611     | 36    |
| H00F | 11758    | 1504     | 4075     | 33    |
| H00G | 6304     | 4785     | 5088     | 33    |
| H00H | 5196     | -2171    | 2943     | 45    |
| H00L | 1915     | 5820     | 3675     | 37    |
| H00N | 995      | 4464     | 3132     | 42    |
| H00O | 10369    | 2233     | 1935     | 39    |
| H00Q | 12801    | 4061     | 5039     | 37    |
| H00R | 5995     | 647      | 4138     | 37    |
| H00S | 5765     | 6524     | 5469     | 48    |

|      |       |       |      |    |
|------|-------|-------|------|----|
| H00T | 8483  | 6448  | 3958 | 39 |
| H00U | 7513  | -978  | 2893 | 35 |
| H00V | 3672  | -565  | 4181 | 39 |
| H00W | 7838  | 8205  | 4319 | 43 |
| H00X | 2707  | 2930  | 2916 | 37 |
| H00Y | 3363  | -2028 | 3601 | 48 |
| H00Z | 11640 | -535  | 3113 | 43 |
| H010 | 13255 | -322  | 2415 | 50 |
| H011 | 12626 | 1025  | 1829 | 45 |
| H012 | 6511  | 8227  | 5086 | 54 |
